1 **Combinatorial drug-microenvironment interaction mapping reveals cell-extrinsic**  
2 **drug resistance mechanisms and clinically relevant patient subgroups in CLL**

3

4 **Short Title for Running Head:**

5 **Drug-microenvironment-genetic interactions in CLL**

6

7 Peter-Martin Bruch<sup>\*1,2</sup>, Holly A. R. Giles<sup>\*1-4</sup>, Carolin Kolb<sup>1,2</sup>, Sophie A. Herbst<sup>1-3,5</sup>, Tina  
8 Becirovic<sup>1</sup>, Tobias Roider<sup>1-3</sup>, Junyan Lu<sup>3</sup>, Sebastian Scheinost<sup>5,7</sup>, Lena Wagner<sup>5,7</sup>, Jennifer  
9 Huellein<sup>3</sup>, Ivan Berest<sup>3</sup>, Mark Kriegsmann<sup>6</sup>, Katharina Kriegsmann<sup>1</sup>, Christiane Zgorzelski<sup>6</sup>,  
10 Peter Dreger<sup>1</sup>, Judith B. Zaugg<sup>2,3</sup>, Carsten Müller-Tidow<sup>1,2</sup>, Thorsten Zenz<sup>8</sup>, Wolfgang  
11 Huber<sup>#2,3</sup>, Sascha Dietrich<sup>#1-3,5</sup>

12

- 13 1. Department of Medicine V, University of Heidelberg, Heidelberg, Germany  
14 2. Molecular Medicine Partnership Unit (MMPU), Heidelberg, Germany  
15 3. EMBL Heidelberg, Heidelberg, Germany  
16 4. Collaboration for joint PhD degree between EMBL and Heidelberg University, Faculty  
17 of Biosciences, Heidelberg, Germany  
18 5. German Cancer Research Center (DKFZ), Heidelberg, Germany  
19 6. Institute of Pathology, University of Heidelberg, Heidelberg, Germany  
20 7. National Center for Tumour Diseases, Heidelberg, Germany  
21 8. Department of Hematology, University of Zürich, Zürich, Switzerland

22 \* These authors contributed equally

23 # These senior authors contributed equally

24

25

26

27 **Corresponding Author Details**

28 **Name:** Sascha Dietrich

29 **Address:** Im Neuenheimer Feld 410, 69120 Heidelberg, Germany

30 **Email:** Sascha.Dietrich@med.uni-heidelberg.de

31 **Phone:** 06221/56-39894 06621/56-310977

32 **Fax number:** 06221/56-5736

33

34 **Name:** Wolfgang Huber

35 **Address:** Meyerhofstraße 1, 69117 Heidelberg, Germany

36 **Email:** wolfgang.huber@embl.de

37 **Phone:** +49 6221 387-8823

38 **Fax number:** +49 6221 387-8166

39 **Abstract**

40 The tumour microenvironment and genetic alterations collectively influence drug efficacy in  
41 cancer, but current evidence is limited to small scale studies and systematic analyses are  
42 lacking. We chose Chronic Lymphocytic Leukaemia (CLL), the most common leukaemia in  
43 adults, as a model disease to study this complex interplay systematically.

44 We performed a combinatorial assay using 12 drugs individually co-applied with each of 17  
45 microenvironmental stimuli in 192 primary CLL samples, generating a comprehensive map of  
46 drug-microenvironment interactions in CLL. This data was combined with whole-exome  
47 sequencing, DNA-methylation, RNA-sequencing and copy number variant annotation.

48 Our assay identified four distinct CLL subgroups that differed in their responses to the panel  
49 of microenvironmental stimuli. These subgroups were characterized by distinct clinical  
50 outcomes independently of known prognostic markers. We investigated the effect of CLL-  
51 specific recurrent genetic alterations on microenvironmental responses and identified trisomy  
52 12 as an amplifier of multiple microenvironmental stimuli. We further quantified the impact of  
53 microenvironmental stimuli on drug response, confirmed known interactions such as  
54 Interleukin (IL) 4 mediated resistance to B cell receptor (BCR) inhibitors, and identified new  
55 interactions such as Interferon- $\gamma$  induced resistance to BCR inhibitors. Finally, we identified  
56 interactions which were limited to genetic subgroups. Resistance to chemotherapeutics, such  
57 as Fludarabine, induced by Toll-Like Receptor (TLR) agonists could be observed in IGHV  
58 unmutated patient samples and IGHV mutated samples with trisomy 12. In-vivo relevance was  
59 investigated in CLL-infiltrated lymph nodes, which showed increased IL4 and TLR signalling  
60 activity compared to healthy samples ( $p < 0.001$ ). High IL4 activity in lymph nodes correlated  
61 with faster disease progression ( $p = 0.038$ ).

62

63 We provide a publicly available resource ([www.dietrichlab.de/CLL\\_Microenvironment/](http://www.dietrichlab.de/CLL_Microenvironment/)) which  
64 uncovers tumour cell extrinsic influences on drug response and disease progression in CLL,  
65 and how these interactions are modulated by cell intrinsic molecular features.

## 66 **Introduction**

67 CLL is a common B-cell malignancy, attributed to the accumulation of mature B-lymphocytes  
68 in the peripheral blood, bone marrow, and lymph nodes<sup>1</sup>. The disease course is  
69 heterogeneous, influenced by multiple factors including B cell receptor (BCR) signalling,  
70 genetic alterations, epigenetic effects, and the tumour microenvironment<sup>2</sup>. Despite significant  
71 improvements to CLL treatment, including the advent of BCR inhibitors<sup>3</sup> and BH3-mimetics<sup>4</sup>,  
72 CLL remains incurable. There is a compelling need to better understand cell-intrinsic and  
73 extrinsic causes of therapy failure.

74

75 The genetic landscape of CLL is well characterised. The most important features include  
76 del(17p), *TP53*-mutations, immunoglobulin heavy chain gene (IGHV) mutation status,  
77 del(13q) and trisomy 12<sup>5,6</sup>. This list of recurrent genetic and structural alterations has  
78 expanded in the past years<sup>7</sup>. The predictive value of those alterations has however declined  
79 in the context of modern targeted therapies and resistance mechanisms are incompletely  
80 understood<sup>8</sup>.

81

82 Additionally to cell-intrinsic factors, CLL cell proliferation and survival is dependent on the  
83 lymph node microenvironment<sup>9</sup>, which is underlined by the observation that CLL cells undergo  
84 spontaneous apoptosis *in vitro* if deprived of protective microenvironmental signals<sup>10</sup>.  
85 Microenvironmental stimuli can induce drug resistance *in vitro*, for example the combination  
86 of IL2 and resiquimod, a Toll-Like Receptor (TLR) 7 / 8 stimulus, induces resistance to  
87 venetoclax<sup>11</sup>. The CLL microenvironment constitutes a complex network of stromal and  
88 immune cells that promote cell expansion<sup>12</sup> via soluble factors and cell-cell contacts.  
89 Microenvironmental signalling is particularly important in protective niches, especially lymph  
90 nodes. Incomplete response to BCR inhibitors has been linked to persistent enlargement of  
91 lymph nodes<sup>13</sup>, which are the main site of CLL proliferation<sup>9</sup>.

92

93 Several studies have investigated individual components of the microenvironment in  
94 leukaemia<sup>14-18</sup>. However, systematic studies, particularly those exploring cell-extrinsic  
95 influences on drug response, are rare. Carey et al.<sup>19</sup> have screened acute myeloid leukaemia  
96 samples with a panel of soluble factors and among them identified IL1 $\beta$  as a mediator of  
97 cellular expansion in Acute Myeloid Leukaemia. This example highlights the value of systematic  
98 approaches to dissect tumour-microenvironment crosstalk.

99

100 Taking this approach further, we screened a panel of microenvironmental stimuli in CLL,  
101 individually and in combination with drugs, and complemented our dataset with multi-omics  
102 data on the patient samples. In this study, we integrate genetic, epigenetic and  
103 microenvironmental modulators of drug response in CLL systematically in a large patient  
104 cohort that covers the clinical and molecular diversity of CLL. Due to the dependency on  
105 microenvironmental support, CLL is an important model system for the interaction between  
106 malignant and microenvironmental cells in general.

107

## 108 **Methods**

### 109 **Sample preparation and drug-stimulation profiling**

110 Sample preparation, cell-culture, drug-stimulation profiling, and genomic annotation was  
111 performed on 192 CLL patient samples as previously described<sup>20</sup> with the following  
112 adjustments. Stimuli and drugs were mixed and preplated in the culture plates directly before  
113 adding the cell suspensions. RPMI-1640 and supplements were acquired from Gibco by Life  
114 Technologies, human serum was acquired from PAN Biotech (Cat.No. P40-2701, Lot.No:P-  
115 020317). Viability was assessed by measuring ATP concentration using CellTiter-Glo  
116 (Promega) after 48h. Luminescence was measured on a Perkin Elmer EnVision.

117

### 118 **Compounds and Stimuli**

119 Compounds and stimulatory agents were dissolved, stored, and diluted according to  
120 manufacturer's protocol. HS-5 conditioned medium was produced by incubating HS-5 stromal  
121 cell line to >80% confluency and cell removal by centrifugation. For a detailed list of stimuli  
122 and drugs and associated concentrations, see Supp. Tables 1 and 2. Final DMSO concentration  
123 did not exceed 0.3%.

124

### 125 **Immunohistochemistry**

126 Lymph node biopsies of CLL-infiltrated and non-neoplastic samples were formalin fixed,  
127 paraffin embedded, arranged in Tissue Microarrays and stained for pSTAT6 (ab28829, Abcam)  
128 and pIRAK4 (ab216513, Abcam). The slides were analysed using Qupath<sup>21</sup> and the  
129 recommended protocol.

130

### 131 **Data processing and statistical analysis**

132 To quantify the responses to drugs and stimuli, we used a measure of viability relative to the  
133 control, namely the natural logarithm of the ratio between CellTiter Glo luminescence readout  
134 of the respective treatment and the median of luminescence readouts of the DMSO control

135 wells on the same plate, excluding controls on the outer plate edges. Data analysis was  
136 performed using R version 4 and using packages including DESeq2<sup>22</sup>, survival<sup>23</sup>, Glmnet<sup>24</sup>,  
137 ConsensusClusterPlus<sup>25</sup>, clusterProfiler<sup>26</sup>, ChIPseeker<sup>27</sup>, genomation<sup>28</sup> and  
138 BloodCancerMultiOmics2017<sup>29</sup> to perform univariate association tests, multivariate regression  
139 with and without lasso penalization, Cox regression, generalised linear modelling and  
140 clustering. The complete analysis is described along with computer-executable transcripts at  
141 [github.com/Huber-group-EMBL/CLLCytokineScreen2021](https://github.com/Huber-group-EMBL/CLLCytokineScreen2021).

142

143 For Figure 2A, Clusters were determined by repeated hierarchical clustering over 10.000  
144 repetitions with randomly selected sample subsets of 80% with the Euclidean metric using  
145 ConsensusClusterPlus<sup>25</sup>. LDT was calculated as previously described<sup>30</sup>. For figure 2D  
146 Multinomial regression with lasso penalisation with a matrix of genetic features ( $p=39$ ), and  
147 IGHV status (encoded as  $M = 1$  and  $U = 0$ ) was used to identify multivariate predictors of  
148 cluster assignment. Coefficients shown are mean coefficients from 50 bootstrapped repeats  
149 and error bars represent the mean  $\pm$  standard deviation. Genetic features with  $>20\%$  missing  
150 values were excluded, and only patients with complete annotation were included in the model  
151 ( $n=137$ ).

152

153 Significance testing for genetic determinants of microenvironmental response shown in Figure  
154 3A was performed for somatic mutations and copy number aberrations present in  $\geq 3$  patients,  
155 and IGHV status ( $n = 54$ ). For multivariate modelling with L1 penalisation shown in Figure 3B,  
156 to generate the feature matrix genetic alterations with less than 20% missing values were  
157 considered, KRAS, BRAF and NRAS mutations were summarised as RAS/RAF alterations and  
158 only patient samples with complete genetic annotation were tested. In total, 39 genetic  
159 features as well as IGHV status (encoded as  $M = 1$  and  $U = 0$ ), and Methylation Cluster  
160 (encoded as 0, 0.5, 1) and 129 patients were included in this analysis.

161

162 For Figures 4C and D RNA-Seq data on matched samples belonging to clusters C3 and C4 were  
163 selected, Ig Genes were filtered out, differentially expressed genes were calculated with the  
164 design formula  $\sim$  IGHV + Cluster using the Deseq2 package and ranked based on Wald  
165 statistics. GSEA was performed using the fgsea algorithm. For Fig 4E, we selected the raw  
166 sequencing files from Rendeiro et al. 2016<sup>31</sup> to include one sample per patient passing quality  
167 checks (n=52). We obtained bam files mapped to the hg19 genome and adjusted for CG bias  
168 as previously outlined<sup>32</sup>. As trisomy 12 status was not already annotated, we called trisomy 12  
169 in samples that contained  $> 1.4$  times more reads per peak on average in chromosome 12,  
170 compared to peaks on other chromosomes. We used diffTf in permutation mode<sup>32</sup> to infer the  
171 differential TF activity between trisomy 12 and non-trisomy 12 samples using HOCOMOCO  
172 v10<sup>33</sup> with design formula: " $\sim$  sample\_processing\_batch + sex + IGHV status + trisomy 12".  
173 For Figures 4E and H, change in TF activity is inferred using diffTF<sup>32</sup>, and measured as  
174 weighted mean difference. For Figure 4F, we used ChIPseq data from Care et al. 2014<sup>34</sup> to  
175 define TF targets as the closest gene to each significant ChIP peak (q value $<0.05$ ) and within  
176  $\pm 1$ kb of Transcription Start Site. Over-representation tests were run using clusterProfiler  
177 package<sup>26</sup> and the method corresponds to one-sided version of Fisher's exact test. For Figure  
178 4H, CLL cells have been treated for 6h hours with IBET-762 (1 $\mu$ M) or DMSO as solvent control  
179 before isolation and transposition of DNA for ATAC Seq. Raw ATACseq data generated from  
180 IBET-762 and DMSO treated CLL samples were processed as described in Berest et al. 2019<sup>32</sup>,  
181 mapped to hg38. We then used analytical mode of diffTF with HOCOMOCO v11 database<sup>33</sup>  
182 using the following parameters: minOverlap = 2; design formula = " $\sim$ Patient + treatment."  
183 The plot depicts weighted mean difference of different diffTF analyses (trisomy 12 vs. non-  
184 trisomy 12 and IBET-762 treated cells vs. DMSO treated cells), absolute effect sizes should  
185 therefore not be directly compared. Significantly different TFs from the trisomy 12 vs. non-  
186 trisomy 12 analysis are shown.

187

188 To generate predictor profiles for Figure 6A, linear model in Eqn. (1) was fitted in a sample -



189 specific manner, to calculate drug stimulus interaction coefficients ( $\beta_{int}$ ) for each patient  
190 sample. Associations between the size of  $\beta_{int}$  and genetic features were identified using  
191 multivariate regression with L1 (lasso) regularisation with gene mutations ( $p = 39$ ) and IGHV  
192 status as predictors and selecting coefficients that were chosen in  $>90\%$  of bootstrapped  
193 model fits.

194

195 For Figure 7G+H pSTAT6 and pIRAK4 groups were defined using maximally selected rank  
196 statistics based on staining intensities. The same 64 CLL lymph node samples, for which  
197 survival data was available, were used for both Kaplan-Meier plots.

198

#### 199 **Data Sharing Statement**

200 Screening data and patient annotation used in this study are available at [github.com/Huber-](https://github.com/Huber-group-EMBL/CLLCytokineScreen2021)  
201 [group-EMBL/CLLCytokineScreen2021](https://github.com/Huber-group-EMBL/CLLCytokineScreen2021). For original sequencing data and raw viability data  
202 please contact the corresponding authors. We obtained CLL ATACseq data<sup>31</sup> from the EGA  
203 (EGAD00001002110) and ChIPseq data for Spi-B binding<sup>34</sup> from the NCBI GEO database<sup>35</sup>  
204 (GSE56857, GSM1370276).

## 205 **Results**

### 206 ***Ex-vivo* cell viability assay demonstrates functional diversity of cytokine and** 207 **microenvironmental signalling pathways**

208 We measured the effects of 17 cytokines and microenvironmental stimuli on cell viability in  
209 192 primary CLL samples and combined each with 12 drugs to investigate the influence on  
210 spontaneous and drug-induced apoptosis. (Fig 1A-C, Supp. Tables 1 -3). Viability was assessed  
211 by ATP measurement after 48h and normalised to untreated controls<sup>20</sup>.

212

213 The patient samples were characterised by DNA sequencing, mapping of copy number  
214 variants, genome-wide DNA-methylation profiling, and RNA-Sequencing<sup>20</sup>. The distribution of  
215 genetic features in our cohort is comparable to other studies (Supp. Fig 1)<sup>6</sup>.

216

217 To assess the heterogeneity of the response patterns, we calculated Pearson correlation  
218 coefficients for each pair of drugs and each pair of stimuli. For the drugs, high correlation  
219 coefficients ( $>0.75$ ) were associated with identical target pathways. For example, drugs  
220 targeting the BCR pathway (ibrutinib, idelalisib, PRT062607 and selumetinib) were highly  
221 correlated, indicating that our data sensitively and specifically reflect inter-individual  
222 differences in pathway dependencies (Fig. 1D)<sup>20</sup>.

223 In contrast, microenvironmental stimuli showed lower correlations, even where stimuli  
224 targeted similar pathways (Fig. 1E, Supp. Fig. 2). For example, lower correlations were  
225 observed between different stimuli of the JAK-STAT and NfκB pathways, indicating a low  
226 degree of redundancy between stimuli. High correlations ( $R>0.75$ ) were only seen with the  
227 TLR stimuli resiquimod (TLR7/8) and CpG ODN (TLR9) as well as IL4 and IL4 + soluble CD40L  
228 (sCD40L), which target near identical receptors and downstream targets.

229 Most stimuli increased CLL viability, underlining the supportive nature of the  
230 microenvironment. However, IL6, tumor growth factor  $\beta$  (TGF $\beta$ ), and TLR7/8/9 agonists in

231 IGHV-mutated (IGHV-M) samples decreased viability (Supp. Fig. 3). The strongest responses  
232 were seen with IL4 and TLR7/8/9 agonists, highlighting the potency of these pathways in  
233 modulating CLL survival. All screening data can be explored manually ([github.com/Huber-](https://github.com/Huber-group-EMBL/CLLCytokineScreen2021)  
234 [group-EMBL/CLLCytokineScreen2021](https://github.com/Huber-group-EMBL/CLLCytokineScreen2021)) and interactively, via the shiny app  
235 ([www.dietrichlab.de/CLL\\_Microenvironment/](http://www.dietrichlab.de/CLL_Microenvironment/)).

## 236 **Patterns of responses to microenvironmental stimuli reveal two subgroups of** 237 **IGHV-M CLL with differential aggressiveness**

238 To gain a global overview over the pattern of responses to our set of microenvironmental  
239 stimuli across patient samples, we clustered<sup>25</sup> and visualised the response profiles (Fig. 2A).

240 This analysis revealed four functionally defined subgroups with distinct response profiles. Two  
241 clusters (termed C1 and C2) were enriched in IGHV-Unmutated (IGHV-U), and two in IGHV-  
242 M CLL (C3 and C4). C1 and C2 showed strong responses to IL4 and TLR7/8/9 agonists. C2  
243 was distinguished by stronger responses to the stimuli overall, in particular to NFkB agonists  
244 including IL1 $\beta$  and anti-IgM. C3 responded weakly to the majority of stimuli, while C4 was  
245 defined by a decreased viability upon TLR7/8/9 stimulation (Supp Fig. 4).

246 Next, we investigated whether these clusters were associated with differential *in vivo* disease  
247 progression of the corresponding patients. We used lymphocyte doubling time and time to  
248 next treatment to quantify the proliferative capacity of CLL cells. In line with clinical  
249 observations<sup>36</sup>, the IGHV-U enriched C1 and C2 showed a shorter lymphocyte doubling time  
250 than the IGHV-M enriched C3 and C4. More strikingly, C3 showed a significantly shorter  
251 lymphocyte doubling time than C4, indicating a higher proliferative capacity (Fig. 2B).

252

253 This observation was reflected in disease progression rates: The predominantly IGHV-M C3  
254 showed a progression dynamic similar to the IGHV-U enriched C1 and C2. C4, however showed  
255 a longer time to next treatment than C1, C2 and C3 (Cox proportional hazards model, p=

256 0.0014, <0.001, 0.005 respectively, Fig. 2C, Supp. Fig 5A&B). This points towards a subset of  
257 mostly IGHV-M patients with more aggressive disease, which is characterised by its differential  
258 response to microenvironmental stimuli.

259

260 To characterise genetic differences between clusters, we calculated predictor profiles for  
261 cluster assignment, using multinomial regression with the sample mutation profiles (Fig. 2D).  
262 IGHV status was the main predictor of all clusters. Trisomy 12 and *SF3B1* mutations were  
263 associated with C2, which showed enhanced responses to many stimuli. C4, which was  
264 associated with slow *in vivo* progression, showed depletion of *TP53*, *ATM*, *RAS/RAF* mutations  
265 and gain(8q).

266

267 The observed difference in progression dynamics *in vivo* was not explained solely by the known  
268 prognostic markers IGHV, trisomy 12, and *TP53*. A multivariate Cox proportional hazards  
269 model accounting for these features showed an independent prognostic value of the cluster  
270 assignment between C3 and C4 (p=0.039, Supp. Table 4).

271

272 To examine why C3 exhibited faster disease progression than C4, we compared baseline  
273 pathway activity at the time of sampling, using RNA-Sequencing (Supp. Fig. 6A). Gene set  
274 enrichment analysis revealed that key cytokine gene sets were upregulated in C3, including  
275 TNF $\alpha$  signalling via NF $\kappa$ B, indicating higher pathway activity *in vivo* (Fig. 2E, Supp. Fig. 6B).  
276 In addition, pathways that indicate more aggressive disease relating to proliferation,  
277 metabolism and stress response were upregulated in C3 (Supp. Fig. 6 C-E).

278

279 Taken together, the patterns of responses to our set of stimuli distinguish two subgroups of  
280 IGHV-M CLL (C3 and C4) that are characterised by distinct *in vivo* pathway activities and  
281 differential disease progression.

282 **Microenvironmental signals and genetic features collectively determine malignant**  
283 **cell survival**

284 Having observed heterogeneous responses to stimulation, we performed univariate analyses  
285 of genetic determinants of stimulus response, including IGHV status, somatic gene mutations,  
286 and structural variants (Fig. 3A). At least one genetic feature determined stimulus response  
287 for 10/17 stimuli and at least two features for 6/17 stimuli (Student's t-tests, FDR = 10%),  
288 indicating that CLL viability is controlled both by cell-intrinsic mutations and the cells'  
289 microenvironment. The most prominent factors were IGHV status and trisomy 12. Responses  
290 to microenvironmental stimuli were largely independent of receptor expression (Supp. Fig. 7).

291

292 To address the possible interplay of multiple genetic factors, we applied linear regression with  
293 lasso regularisation to derive for each stimulus a multivariate predictor composed of genetic,  
294 IGHV and DNA methylation covariates (Fig. 3B). This revealed at least one genetic predictor  
295 for five of the 17 stimuli. Trisomy 12 and IGHV status were again the most common features.  
296 Stimulus responses stratified by mutations, along with regression model fits can be explored  
297 online ([www.dietrichlab.de/CLL\\_Microenvironment/](http://www.dietrichlab.de/CLL_Microenvironment/)).

298

299 **Trisomy 12 is a key modulator of responses to stimuli**

300 Our survey of genetic determinants of stimuli response highlighted trisomy 12 as a modulator  
301 of responses to IL4, TGF $\beta$ , soluble CD40L + IL4 and TLR stimuli.

302

303 TLR response has previously been shown to depend on the IGHV mutation status<sup>16</sup>; we  
304 identified trisomy 12 as a second major determinant of response to TLR stimulation. IGHV  
305 mutated CLL samples with trisomy 12 showed a strongly increased viability after TLR  
306 stimulation with resiquimod compared to those without trisomy 12. IGHV unmutated CLL cells  
307 showed a strong increase in viability upon TLR stimulation regardless of trisomy 12 status  
308 (Fig. 4A). In line with our previous findings, we found a trend towards higher toxicity of BCR

309 inhibition in trisomy 12 patients, indicating a dependency of the trisomy 12 effect on the BCR  
310 pathway (Fig. 4B)<sup>20</sup>. Further, we observed that the pro-survival effect of TLR stimulation, which  
311 is increased in IGHV-U and trisomy 12 CLL samples, could be reversed by BCR inhibition (Supp.  
312 Fig. 8)

313  
314 To investigate the incompletely understood role of trisomy 12 in CLL, we investigated how it  
315 might modulate responses to cell-extrinsic signals. We began by investigating the  
316 transcriptomic signature of trisomy 12 and performed a gene set enrichment analysis of  
317 trisomy 12 vs. non-trisomy 12 samples. Using the hallmark gene sets we found multiple  
318 microenvironmental signalling cascades to be upregulated including TNF $\alpha$  and Interferon  
319 response pathways (Fig. 4C). Since important microenvironmental pathways are missing in  
320 the hallmark gene sets, we repeated this analysis for selected KEGG gene sets relating to  
321 microenvironmental signalling and found the BCR and chemokine signalling pathways to be  
322 upregulated (Fig. 4D). Overall, trisomy 12 CLL samples exhibit a higher activity of  
323 microenvironmental signalling pathways including BCR signalling.

324  
325 To investigate potential downstream effectors in trisomy 12 CLL, we visualised transcription  
326 factor (TF) activity profiles based on chromatin accessibility data derived from ATAC  
327 sequencing. We used the *diffTF*<sup>32</sup> software to identify TFs with differential binding site  
328 accessibility between trisomy 12 and non-trisomy 12 CLL, using ATAC sequencing data for two  
329 non-trisomy 12 and two trisomy 12 CLL PBMC samples. The binding sites of 92 TFs respectively  
330 were more accessible ( $p < 0.05$ ) in the trisomy 12 samples (Supp. Fig. 9), reflecting a specific  
331 signalling signature in trisomy 12 CLL. The top hit was the hematopoietic regulator Spi-B,  
332 followed by PU.1, which share similar binding motifs and exhibit functional redundancy<sup>37</sup>. We  
333 validated this finding in a second independent dataset taken from Rendeiro et al.<sup>31</sup>, which  
334 included 43 WT and nine trisomy 12 samples. The binding sites of nine TFs were more  
335 accessible ( $p < 0.05$ ) in the trisomy 12 samples (Fig. 4E), and Spi-B and PU.1 were again the

336 top hits. These TFs are known to be key regulators of healthy B-cell function<sup>38,39</sup>, controlling  
337 B-cell responses to environmental cues including CD40L, TLR ligands and IL4<sup>40</sup>.

338 We hypothesised that Spi-B might modulate proliferation by coordinating transcriptional  
339 response to microenvironmental signals. To identify Spi-B target genes, we reanalysed a  
340 ChIPseq dataset<sup>34</sup>, quantifying binding in lymphoma cell lines and tested functional enrichment  
341 of immune signalling pathways amongst Spi-B targets. Using selected KEGG and Reactome  
342 genesets, we found that TLR, BCR and TGF $\beta$  signalling genes were enriched ( $p < 0.01$ ) amongst  
343 Spi-B targets (Fig. 4F).

344 We next investigated whether Spi-B activity and the trisomy 12 signalling signature might be  
345 targetable. Amongst the panel of drugs included in this screen, we noted that the  
346 bromodomain inhibitor IBET-762 demonstrated higher efficacy in trisomy 12 CLL cells (Fig.  
347 4G). We generated an additional ATACseq dataset consisting of four CLL PBMC samples each  
348 treated with IBET-762 and DMSO as control. Using diffTF, we quantified TF binding site  
349 accessibility and visualised inferred TF activity for trisomy 12 signature TFs. All nine TFs that  
350 showed higher accessibility in trisomy 12 exhibited decreased accessibility upon treatment  
351 with IBET-762 (Fig. 4H).

352 Taken together, we highlight trisomy 12 as a modulator of response to microenvironmental  
353 signals, link these effects to differentially active BCR signalling and suggest bromodomain  
354 inhibition as a possible therapeutic target in trisomy 12 patients.

### 355 **Mapping drug-microenvironment interactions reveals drug resistance and** 356 **sensitivity pathways**

357 Guided by the observation of reduced treatment efficacy in protective niches<sup>13</sup>, we examined  
358 the effects of the stimuli on drug response.

359 We fitted a linear model (Eqn 1) to quantify how each stimulus modulates drug efficacy beyond  
360 its individual effects, such as the impact of the stimuli on baseline viability and spontaneous  
361 apoptosis.  $\beta_{int}$ , termed the interaction factor, quantifies how the combined treatment effect  
362 differs from the sum of the individual treatment effects.

363

$$364 \log V = \beta_d X_d + \beta_s X_s + \beta_{int} X_d X_s + \varepsilon \quad \text{Eqn 1}$$

365

366  $V$  represents the viability with a given treatment,  $\beta_d$ ,  $\beta_s$  and  $\beta_{int}$  are coefficients for the drug,  
367 stimulus, and combinatorial terms respectively,  $X_d$  and  $X_s$  are indicator variables (0 or 1) for  
368 the presence or absence of a drug/stimulus.  $\varepsilon$  is the vector of model residuals.

369

370 45 out of 204 combinations had a  $\beta_{int}$  with  $p < 0.05$ . We classified these into four categories,  
371 based on the sign of  $\beta_{int}$  and whether the combination effect was antagonistic or synergistic  
372 (Fig. 5A-C).

373

374 Positive antagonistic interactions were the most common category, in which stimuli reversed  
375 drug action and increased viability. These interactions could lead to treatment resistance *in*  
376 *vivo*. They comprised known resistance mechanisms including the inactivation of ibrutinib by  
377 IL4 signalling (Fig. 5D)<sup>18</sup>, and previously unknown resistance pathways, notably the effect of  
378 interferon- $\gamma$  (IFN $\gamma$ ) signalling on ibrutinib response (Fig. 5E).

379

380 6/45 interactions were categorised as negative antagonistic, in which drug action reversed the  
381 pro-survival effect of microenvironmental stimulation. These interactions point to strategies to  
382 overcome treatment resistance. For instance, Pan-JAK inhibition reduced the increase in  
383 viability from sCD40L + IL4 stimulation (Fig. 5F).

384



385 We observed a single positive synergistic case, whereby simultaneous treatment with IFN $\gamma$   
386 and ralimetinib, a p38 MAPK inhibitor, induced a synergistic increase in viability which was not  
387 observed with either single treatment (Fig. 5G), pointing towards an inhibitory effect of p38  
388 activity on IFN $\gamma$  signalling.

389

390 16 combinations showed negative synergistic interactions. For example, TLR9 agonist CpG  
391 ODN increased the efficacy of BCR inhibition (Fig. 5H). Interestingly, in samples where TLR  
392 stimulation increased viability, the addition of BCR inhibitors (ibrutinib and idelalisib)  
393 suppressed this effect, indicating that the increase of viability upon TLR stimulation is  
394 dependent on BCR activity. The efficacy of luminespib, a HSP90 inhibitor, increased with  
395 various stimuli, including soluble anti-IgM (Fig. 5I).

396

397 Altogether, these results highlight the influence of the microenvironment on drug efficacy and  
398 underline the value of microenvironmental stimulation in *ex vivo* studies of drug efficacy.

### 399 **Genetic features affect drug-microenvironment interactions**

400 Next, to investigate to what extent genetic driver mutations modulated the interactions  
401 between stimuli and drugs, we fit the linear model in Eqn. (1) in a sample - specific manner.

402

403 This resulted in a sample-specific  $\beta_{int}$  interaction coefficient for each drug - stimulus  
404 combination. We looked for associations between the size of  $\beta_{int}$  and genetic features using  
405 multivariate regression with L1 (lasso) regularisation, with gene mutations and IGHV status as  
406 predictors. We generated a predictor profile for each drug - stimulus combination, considering  
407 predictors that were selected in >90% of bootstrapped model fits. In total, we found genetic  
408 modulators for 60/204 interactions (Fig 6A, Supp Fig. 10). Trisomy 12 and IGHV status  
409 modulated the largest number of interactions.

410

411 For example, we found the value of  $\beta_{int}$  for fludarabine and CpG ODN to be modulated by six  
412 genetic factors; most strongly by IGHV status, del(11q), and trisomy 12 (Fig. 6B).

413 In IGHV-M non-trisomy 12 samples, fludarabine efficacy increased in the presence of TLR  
414 stimulation, whilst in the other subgroups TLR stimulation induced resistance to fludarabine  
415 (Fig. 6C).

416  
417 Our approach also identified interactions dependent on single treatment effects. IL4 induced  
418 complete resistance to ibrutinib regardless of higher ibrutinib efficacy in trisomy 12 and IGHV-  
419 U samples. This highlights the breadth of IL4-induced resistance to ibrutinib in CLL across  
420 genetic backgrounds (Fig. 6D, Supp. Fig. 11).

421  
422 Overall, these findings illustrate how the presence of known genetic alterations determines  
423 how drugs and external stimuli interact with each other.

#### 424 **The key resistance pathways IL4 and TLR show increased activity in CLL-infiltrated** 425 **lymph nodes**

426  
427 Microenvironmental signalling within lymph nodes has been implicated in treatment  
428 resistance<sup>9,41-43</sup>, though a clear understanding of the mechanisms involved remains missing.  
429 Since IL4 and TLR signalling were the most prominent modulators of drug response in our  
430 study, we assessed their activity within the lymph node niche. We stained paraffin embedded  
431 sections of 100 CLL-infiltrated and 100 non-neoplastic lymph nodes for pSTAT6, an essential  
432 downstream target of IL4 (Supp. Fig. 12), and pIRAK4, a downstream target of TLR7/8/9.

433  
434 The CLL-infiltrated lymph nodes showed higher levels of pSTAT6 (Fig. 7A) and pIRAK4 (Fig.  
435 7B). Examples are shown in Fig. 7C-F.

436

437 To investigate the influence of microenvironmental activity in lymph nodes on CLL disease  
438 progression, we correlated staining intensity to time to next treatment. High activity of pSTAT-  
439 6 correlated with shorter time to next treatment (Fig. 7G), the same trend could be observed  
440 with higher pIRAK4 (Fig. 7H). Higher IL4 activity within the lymph node appeared to relate to  
441 shorter time to next treatment, and may provide further evidence to the hypothesis that  
442 microenvironmental activity promotes treatment resistance within the lymph node, eventually  
443 leading to relapse.

444 **Discussion**

445 Our work maps the effects of microenvironmental stimuli in the presence of drugs and links  
446 these to underlying molecular properties across 192 primary CLL samples. We employ all  
447 combinations of 17 stimuli with 12 drugs as a reductionist model of microenvironmental  
448 signalling. We account for the confounding effects of spontaneous apoptosis *ex vivo* and  
449 dissect the effect of individual microenvironmental stimuli on baseline viability and drug  
450 toxicity. The results may serve as building blocks for a more holistic understanding of the  
451 interactions of tumour genetics, microenvironment, and drug response in complex *in vivo*  
452 situations.

453 We discover that CLL subgroups can be extracted from microenvironmental response  
454 phenotypes and that this classification is linked to distinct molecular profiles and clinical  
455 outcomes. IGHV-M samples with weaker responses to microenvironmental stimuli showed  
456 faster disease progression, highlighting the important role microenvironmental signalling may  
457 play in CLL pathophysiology.

458 The sensitivity afforded by our approach enabled us to identify drug-stimulus interactions,  
459 meaning instances where the effect of a drug on the tumour cells is modulated by a  
460 microenvironmental stimulus. Our assay recapitulated known drug-resistance phenomena,  
461 such as the impact of IL4 stimulation on ibrutinib and idelalisib<sup>18</sup> and identified new ones,  
462 including IFN $\gamma$ -induced resistance to BCR inhibition. Systematic mapping of drug-stimulus  
463 interactions, such as generated in this study, can be used to inform biology-based  
464 combinatorial treatments across different entities.

465 We demonstrated the breadth of IL4-induced resistance against kinase inhibitors and  
466 chemotherapeutics across a range of genetic backgrounds. IL4 induced complete resistance  
467 to BCR inhibitors across genetic subgroups, despite greater BCR inhibitor efficacy in IGHV-U  
468 CLL. Further, we observed increased IL4 activity within CLL-infiltrated lymph nodes and the  
469 association of higher activity with faster disease progression. Our work highlights the

470 significance of IL4 within the lymph node niche, especially since proliferation<sup>9</sup> and resistance  
471 to BCR inhibition<sup>13</sup> is linked to lymph nodes and our recent work suggests T follicular helper  
472 cells as a source of IL4<sup>44</sup>. Targeting pathways downstream of IL4, via JAK inhibition, has been  
473 reported to improve BCR response in non-responding CLL patients<sup>45</sup>.

474 Underneath cell-extrinsic factors that control the apoptotic and proliferative activity of tumour  
475 cells in response to drugs there lies the network of cell-intrinsic molecular components. We  
476 used multivariate modelling to capture the impact of molecular features on responses to stimuli  
477 and drugs. For instance, the response to TLR stimulation depended on IGHV status, trisomy  
478 12, del11q, del13q and ATM, reflecting the multiple layers of biology involved. Most strikingly,  
479 we observed that TLR stimulation increased fludarabine toxicity in the subgroup of IGHV-M  
480 non-trisomy 12 patient samples, while it led to fludarabine resistance in all other backgrounds.  
481 This finding combined with our observation that TLR signalling is highly active in CLL-infiltrated  
482 lymph nodes might help explain the heterogeneous effects of chemotherapy in CLL, in  
483 particular that fludarabine therapy can achieve lasting remission in IGHV-M but not in IGHV-  
484 U patients.

485  
486 Beyond TLR, trisomy 12 modulated a broad range of stimulus responses and drug-stimulus  
487 interactions, comparable to the impact of IGHV status. Molecularly, we link the observed  
488 trisomy 12 phenotype to upregulated microenvironmental signalling and higher activity of Spi-  
489 B, an essential regulator of environmental sensing in B-cells<sup>40</sup>. The TF signature associated  
490 with trisomy 12 can be reversed by bromodomain inhibition and trisomy 12 samples exhibit  
491 increased sensitivity to bromodomain inhibition, indicating this as potential therapeutic  
492 strategy in trisomy 12 CLL.

493  
494 We present a data resource for the study of drug response in the context of cell-intrinsic and  
495 cell-extrinsic modulators. The data may inform targeted mechanistic investigations<sup>30</sup> and direct

496 efforts for combination therapies. The entire dataset, including the reproducible analysis, can  
497 be downloaded from the online repository ([github.com/Huber-group-](https://github.com/Huber-group-EMBL/CLLCytokineScreen2021)  
498 [EMBL/CLLCytokineScreen2021](https://github.com/Huber-group-EMBL/CLLCytokineScreen2021)), or explored interactively  
499 ([www.dietrichlab.de/CLL\\_Microenvironment/](http://www.dietrichlab.de/CLL_Microenvironment/)).

## 500 **Acknowledgments**

501 We thank the Department of Medicine V, University of Heidelberg, Molecular Medicine  
502 Partnership Unit (MMPU), EMBL Heidelberg and DKFZ/Heidelberg Center for Personalized  
503 Oncology (DKFZ/HIPO) for technical support and funding. H.A.R.G. was supported by a  
504 Joachim-Herz Add-on Fellowship for Interdisciplinary Science. P.M.B was supported by a  
505 doctoral scholarship of the Franziska-Kolb foundation. S.D. was supported by the Else Kröner  
506 Fresenius Foundation, the Federal Ministry of Education and Research (SYMPATHY) and the  
507 German Research Foundation (SFB873). J.L., S.D. and W.H. were supported by the German  
508 Federal Ministry of Education and Research (CompLS project MOFA under grant agreement  
509 number 031L0171A). T.R. was supported by a physician scientist fellowship of the Medical  
510 Faculty of University Heidelberg and the German Federal Ministry of Education and Research  
511 (CompLS project SIMONA under grant agreement number 031L0263A). For experimental  
512 technical support and expertise, we thank Mareike Knoll, Angela Lenze, Brian Lai, and Vladimir  
513 Benes, and Nayara Trevisan Doimo de Azevedohe of the EMBL Genomics Core Facility. We  
514 thank EMBL's IT Services for providing data management and computing infrastructure and  
515 Simone Bell for organisational support. We thank Mike Smith and Frederik Ziebell for advice  
516 on statistics and analysis, Martina Seiffert for the HS-5 stromal cell line, and Michael Boutros,  
517 Moritz Gerstung, Nassos Typas, and Simon Anders for their comments on the manuscript and  
518 their valued advice.

519 P.M.B is a MD candidate at the University of Heidelberg. This work is submitted in partial  
520 fulfilment of the requirement for the MD. H.A.R.G is a PhD candidate for the joint PhD degree  
521 between EMBL and Heidelberg University, Faculty of Biosciences. This work is submitted in  
522 partial fulfilment of the requirement for the PhD.

## 523 **Author contributions**

524 S.D. and P.M.B. designed the experiments. S.D., W.H., H.A.R.G., and P.M.B. conceptualised  
525 the data analysis. W.H. and S.D. supervised the study. W.H., T.Z. and S.D. conceptualised the  
526 multi-omics approach to analyse CLL drug response. P.M.B. performed the drug-stimulus  
527 profiling experiments with support from C.K., S.S., and L.W.. T.Z., C.M.T., and P.D. provided  
528 guidance on experimental protocols. H.A.R.G., P.M.B, J.H., J.L., S.D. performed data  
529 processing and curation. H.A.R.G., and P.M.B. analysed and interpreted the data, with support  
530 from W.H., S.D., J.L, S.H., and T.R., and produced the figures with input from W.H. and S.D..  
531 H.A.R.G. performed statistical inference and regression modelling, P.M.B. performed  
532 exploratory analysis and integration with clinical data. T.B. and S.H. performed the shRNA  
533 knockdown experiments, J.B.Z. and I.B. provided the ATACseq dataset used in Figure 4 and  
534 quantified differential transcription factor activity, M.K., K.K., and C.Z. generated the  
535 immunohistochemistry data, and P.M.B. analysed these data. H.A.R.G. designed and wrote  
536 the Shiny app and the software documentation. P.M.B. and H.A.R.G. wrote the manuscript,  
537 with input from S.D. and W.H.. All authors reviewed and edited the manuscript.

538

## 539 **Conflict of Interest Disclosures**

540 The authors declare that they have no conflict of interests.

541

## 542 **References**

- 543 1. Fabbri, G. & Dalla-Favera, R. The molecular pathogenesis of chronic lymphocytic  
544 leukaemia. *Nat. Rev. Cancer* **16**, 145–162 (2016).
- 545 2. Puente, X. S., Jares, P. & Campo, E. Chronic lymphocytic leukemia and mantle cell  
546 lymphoma: crossroads of genetic and microenvironment interactions. *Blood* **131**, 2283–  
547 2296 (2018).
- 548 3. Burger, J. A. *et al.* Ibrutinib as Initial Therapy for Patients with Chronic Lymphocytic

- 549 Leukemia. *N. Engl. J. Med.* **373**, 2425–2437 (2015).
- 550 4. Fischer, K. *et al.* Venetoclax and Obinutuzumab in Patients with CLL and Coexisting  
551 Conditions. *N. Engl. J. Med.* **380**, 2225–2236 (2019).
- 552 5. Gaidano, G. & Rossi, D. The mutational landscape of chronic lymphocytic leukemia and  
553 its impact on prognosis and treatment. *Hematology Am. Soc. Hematol. Educ. Program*  
554 **2017**, 329–337 (2017).
- 555 6. Döhner, H. *et al.* Genomic aberrations and survival in chronic lymphocytic leukemia. *N.*  
556 *Engl. J. Med.* **343**, 1910–1916 (2000).
- 557 7. Strefford, J. C. The genomic landscape of chronic lymphocytic leukaemia: biological and  
558 clinical implications. *Br. J. Haematol.* **169**, 14–31 (2015).
- 559 8. Burger, J. A. *et al.* Long-term efficacy and safety of first-line ibrutinib treatment for  
560 patients with CLL/SLL: 5 years of follow-up from the phase 3 RESONATE-2 study.  
561 *Leukemia* **34**, 787–798 (2020).
- 562 9. Herndon, T. M. *et al.* Direct in vivo evidence for increased proliferation of CLL cells in  
563 lymph nodes compared to bone marrow and peripheral blood. *Leukemia* **31**, 1340–1347  
564 (2017).
- 565 10. Collins, R. J. *et al.* Spontaneous programmed death (apoptosis) of B-chronic lymphocytic  
566 leukaemia cells following their culture in vitro. *Br. J. Haematol.* **71**, 343–350 (1989).
- 567 11. Oppermann, S. *et al.* High-content screening identifies kinase inhibitors that overcome  
568 venetoclax resistance in activated CLL cells. *Blood* **128**, 934–947 (2016).
- 569 12. Ten Hacken, E. & Burger, J. A. Microenvironment interactions and B-cell receptor  
570 signaling in Chronic Lymphocytic Leukemia: Implications for disease pathogenesis and  
571 treatment. *Biochim. Biophys. Acta* **1863**, 401–413 (2016).
- 572 13. Ahn, I. E. *et al.* Depth and durability of response to ibrutinib in CLL: 5-year follow-up of  
573 a phase 2 study. *Blood* **131**, 2357–2366 (2018).
- 574 14. Chen, Z. *et al.* LINKING MICROENVIRONMENTAL SIGNALS TO METABOLIC SWITCHES  
575 AND IBRUTINIB RESPONSE IN CHRONIC LYMPHOCYTIC LEUKEMIA: PS1125.



- 576 *HemaSphere* **3**, 509–510 (2019).
- 577 15. Jayappa, K. D. *et al.* Microenvironmental agonists generate phenotypic resistance to  
578 combined ibrutinib plus venetoclax in CLL and MCL. *Blood Adv* **1**, 933–946 (2017).
- 579 16. Chatzouli, M. *et al.* Heterogeneous functional effects of concomitant B cell receptor and  
580 TLR stimulation in chronic lymphocytic leukemia with mutated versus unmutated Ig  
581 genes. *J. Immunol.* **192**, 4518–4524 (2014).
- 582 17. Dietrich, S. *et al.* Leflunomide induces apoptosis in fludarabine-resistant and clinically  
583 refractory CLL cells. *Clin. Cancer Res.* **18**, 417–431 (2012).
- 584 18. Aguilar-Hernandez, M. M. *et al.* IL-4 enhances expression and function of surface IgM in  
585 CLL cells. *Blood* **127**, 3015–3025 (2016).
- 586 19. Carey, A. *et al.* Identification of Interleukin-1 by Functional Screening as a Key Mediator  
587 of Cellular Expansion and Disease Progression in Acute Myeloid Leukemia. *Cell Rep.* **18**,  
588 3204–3218 (2017).
- 589 20. Dietrich, S. *et al.* Drug-perturbation-based stratification of blood cancer. *J. Clin. Invest.*  
590 **128**, 427–445 (2018).
- 591 21. Bankhead, P. *et al.* QuPath: Open source software for digital pathology image analysis.  
592 *Sci. Rep.* **7**, 1–7 (2017).
- 593 22. Love, M. I., Huber, W. & Anders, S. Moderated estimation of fold change and dispersion  
594 for RNA-seq data with DESeq2. *Genome Biol.* **15**, 550 (2014).
- 595 23. Therneau, T. M. & Grambsch, P. M. *Modeling Survival Data: Extending the Cox Model.*  
596 (Springer Science & Business Media, 2000).
- 597 24. Friedman, J., Hastie, T. & Tibshirani, R. Regularization Paths for Generalized Linear  
598 Models via Coordinate Descent. *J. Stat. Softw.* **33**, 1–22 (2010).
- 599 25. Wilkerson, M. D. & Hayes, D. N. ConsensusClusterPlus: a class discovery tool with  
600 confidence assessments and item tracking. *Bioinformatics* **26**, 1572–1573 (2010).
- 601 26. Yu, G., Wang, L.-G., Han, Y. & He, Q.-Y. clusterProfiler: an R Package for Comparing  
602 Biological Themes Among Gene Clusters. *OMICS: A Journal of Integrative Biology* vol.

- 603 16 284–287 (2012).
- 604 27. Yu, G., Wang, L.-G. & He, Q.-Y. ChIPseeker: an R/Bioconductor package for ChIP peak  
605 annotation, comparison and visualization. *Bioinformatics* **31**, 2382–2383 (2015).
- 606 28. Akalin, A., Franke, V., Vlahoviček, K., Mason, C. E. & Schübeler, D. Genomation: a  
607 toolkit to summarize, annotate and visualize genomic intervals. *Bioinformatics* **31**,  
608 1127–1129 (2015).
- 609 29. Malgorzata Oles, Sascha Dietrich, Junyan Lu, Britta Velten, Andreas Mock, Vladislav Kim,  
610 Wolfgang Huber. *BloodCancerMultiOmics2017*. (Bioconductor, 2018).  
611 doi:10.18129/B9.BIOC.BLOODCANCERMULTIOMICS2017.
- 612 30. Lu, J. *et al.* Multi-omics reveals clinically relevant proliferative drive associated with  
613 mTOR-MYC-OXPHOS activity in chronic lymphocytic leukemia. *Nat Cancer* (2021)  
614 doi:10.1038/s43018-021-00216-6.
- 615 31. Rendeiro, A. F. *et al.* Chromatin accessibility maps of chronic lymphocytic leukaemia  
616 identify subtype-specific epigenome signatures and transcription regulatory networks.  
617 *Nat. Commun.* **7**, 11938 (2016).
- 618 32. Berest, I. *et al.* Quantification of Differential Transcription Factor Activity and  
619 Multiomics-Based Classification into Activators and Repressors: diffTF. *Cell Rep.* **29**,  
620 3147–3159.e12 (2019).
- 621 33. Kulakovskiy, I. V. *et al.* HOCOMOCO: expansion and enhancement of the collection of  
622 transcription factor binding sites models. *Nucleic Acids Res.* **44**, D116–25 (2016).
- 623 34. Care, M. A. *et al.* SPIB and BATF provide alternate determinants of IRF4 occupancy in  
624 diffuse large B-cell lymphoma linked to disease heterogeneity. *Nucleic Acids Res.* **42**,  
625 7591–7610 (2014).
- 626 35. Edgar, R., Domrachev, M. & Lash, A. E. Gene Expression Omnibus: NCBI gene  
627 expression and hybridization array data repository. *Nucleic Acids Res.* **30**, 207–210  
628 (2002).
- 629 36. Baumann, T. *et al.* Lymphocyte doubling time in chronic lymphocytic leukemia modern

- 630 era: a real-life study in 848 unselected patients. *Leukemia* (2021) doi:10.1038/s41375-  
631 021-01149-w.
- 632 37. Garrett-Sinha, L. A., Dahl, R., Rao, S., Barton, K. P. & Simon, M. C. PU.1 exhibits partial  
633 functional redundancy with Spi-B, but not with Ets-1 or Elf-1. *Blood* **97**, 2908–2912  
634 (2001).
- 635 38. Turkistany, S. A. & DeKoter, R. P. The Transcription Factor PU.1 is a Critical Regulator of  
636 Cellular Communication in the Immune System. *Arch. Immunol. Ther. Exp.* **59**, 431–  
637 440 (2011).
- 638 39. Ray-Gallet, D., Mao, C., Tavitian, A. & Moreau-Gachelin, F. DNA binding specificities of  
639 Spi-1/PU.1 and Spi-B transcription factors and identification of a Spi-1/Spi-B binding site  
640 in the *c-fes/c-fps* promoter. *Oncogene* **11**, 303–313 (1995).
- 641 40. Willis, S. N. *et al.* Environmental sensing by mature B cells is controlled by the  
642 transcription factors PU.1 and SpiB. *Nat. Commun.* **8**, 1426 (2017).
- 643 41. Hayden, R. E., Pratt, G., Roberts, C., Drayson, M. T. & Bunce, C. M. Treatment of  
644 chronic lymphocytic leukemia requires targeting of the protective lymph node  
645 environment with novel therapeutic approaches. *Leuk. Lymphoma* **53**, 537–549 (2012).
- 646 42. Mittal, A. K. *et al.* Chronic lymphocytic leukemia cells in a lymph node microenvironment  
647 depict molecular signature associated with an aggressive disease. *Mol. Med.* **20**, 290–  
648 301 (2014).
- 649 43. Yan, X.-J. *et al.* Identification of outcome-correlated cytokine clusters in chronic  
650 lymphocytic leukemia. *Blood* **118**, 5201–5210 (2011).
- 651 44. Roider, T. *et al.* Dissecting intratumour heterogeneity of nodal B-cell lymphomas at the  
652 transcriptional, genetic and drug-response levels. *Nature Cell Biology* vol. 22 896–906  
653 (2020).
- 654 45. Spaner, D. E., McCaw, L., Wang, G., Tsui, H. & Shi, Y. Persistent janus kinase-signaling  
655 in chronic lymphocytic leukemia patients on ibrutinib: Results of a phase I trial. *Cancer*  
656 *Med.* **8**, 1540–1550 (2019).

Figure 1

A

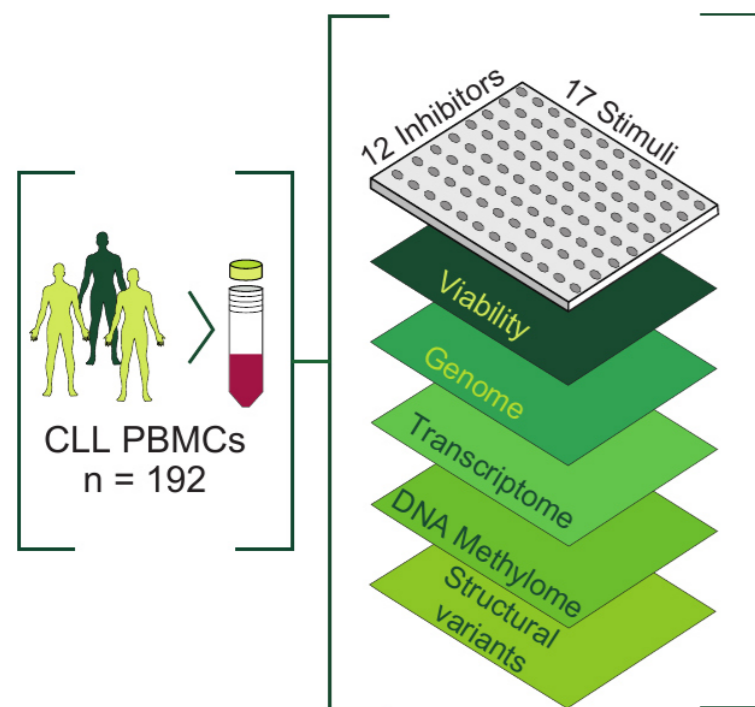

B

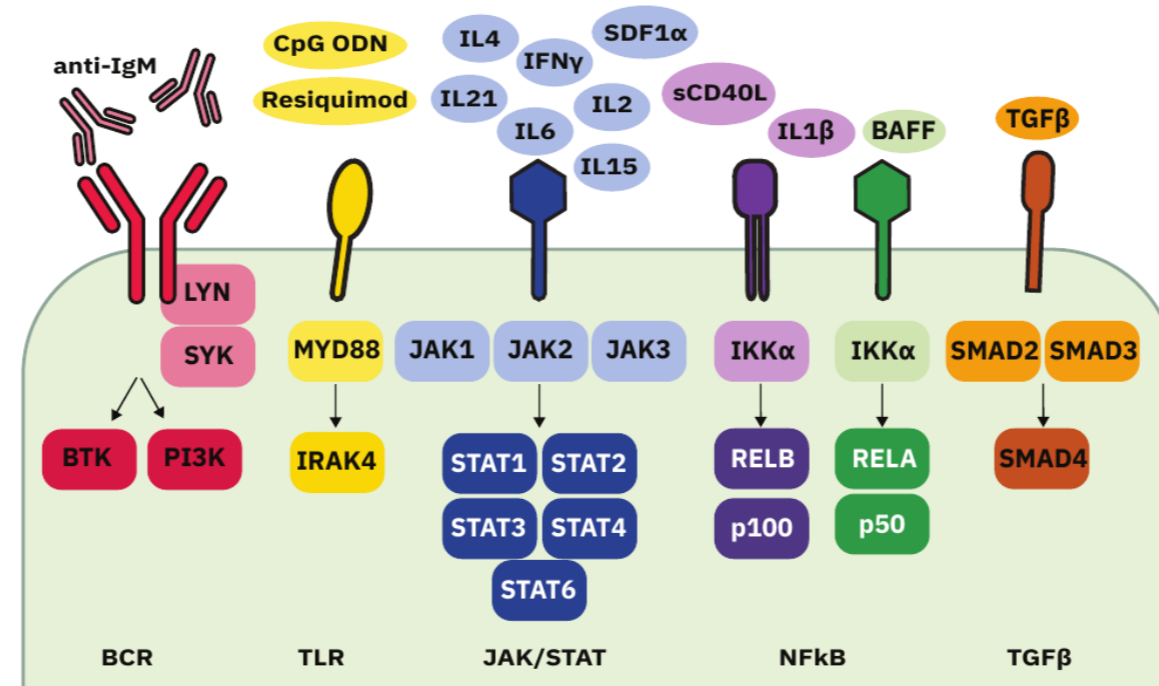

C

| Drug        | Target          | Category      |
|-------------|-----------------|---------------|
| Ibrutinib   | BTK             | BCR           |
| Idelalisib  | PI3K delta      | BCR           |
| PRT062607   | SYK             | BCR           |
| Fludarabine | Purine analogue | DDR           |
| Nutlin-3a   | MDM2            | DDR           |
| I-BET 762   | BRD2/3/4        | Epigenome     |
| Luminespib  | HSP90           | HSP90         |
| Pyridone-6  | JAK1/2/3        | JAK/STAT      |
| Selumetinib | MEK1/2          | MAPK          |
| Ralimetinib | p38 MAPK        | MAPK          |
| Everolimus  | mTOR            | mTOR          |
| BAY-11-7085 | NF $\kappa$ B   | NF $\kappa$ B |

D

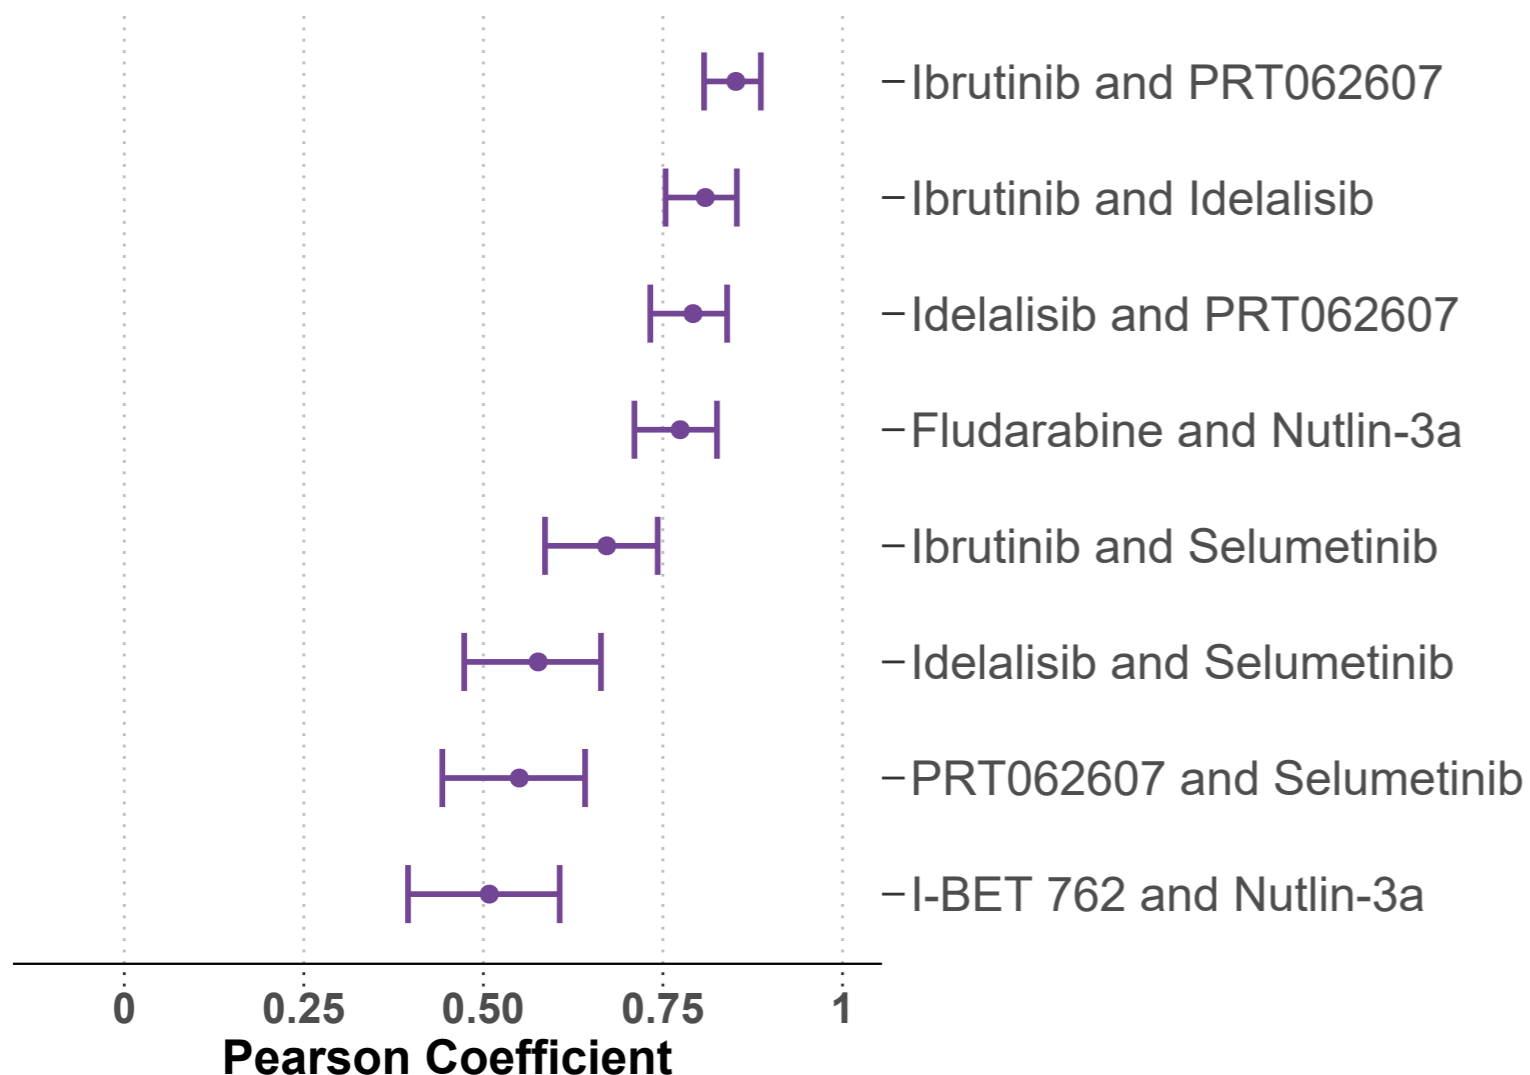

E

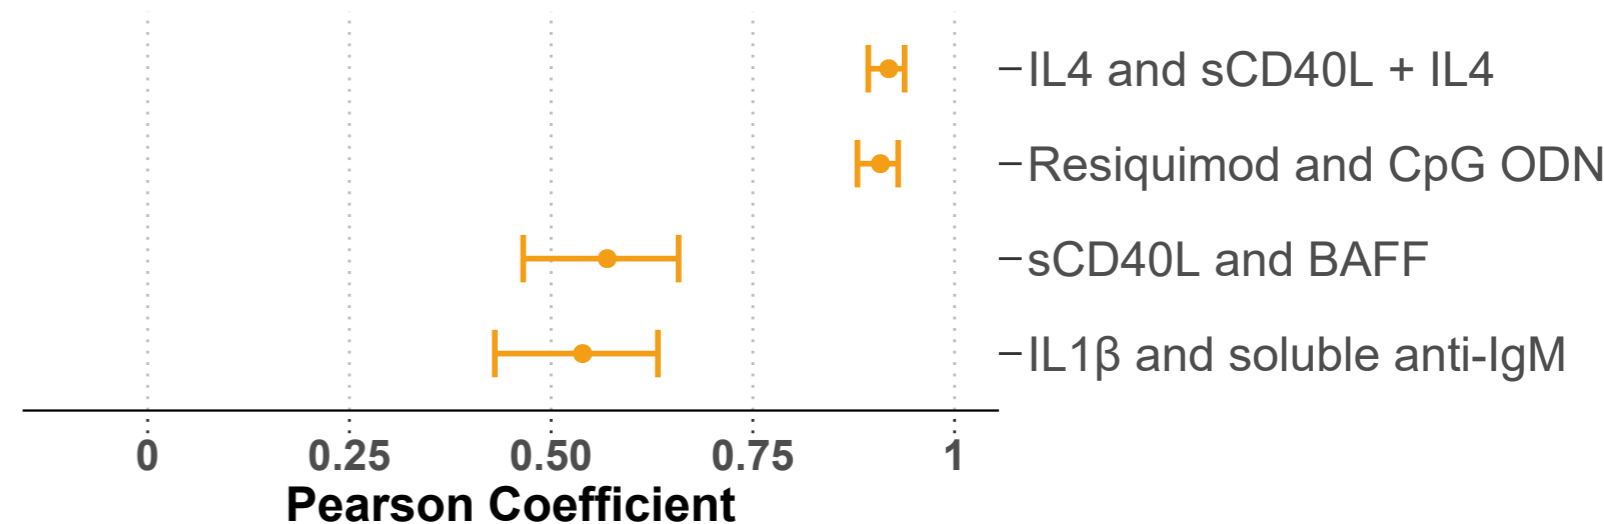

F

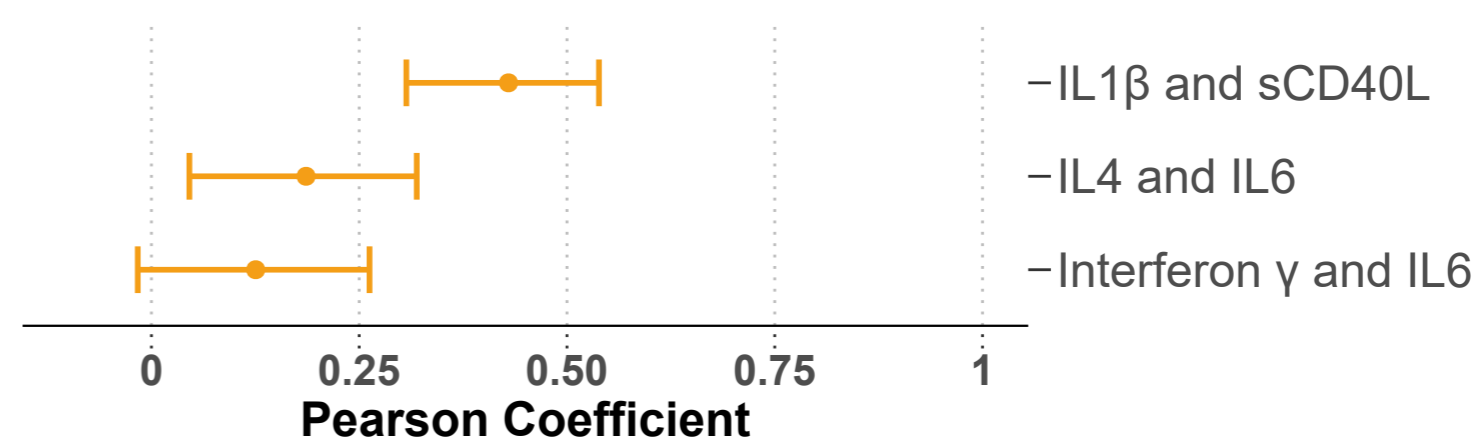

## **Figure 1. Study outline and overview of drugs and stimuli.**

(A) Schematic of experimental protocol. By combining 12 drugs and 17 stimuli, we systematically queried the effects of simultaneous stimulation and inhibition of critical pathways in CLL (n=192). Integrating functional drug-stimulus response profiling with four additional omics layers, we identified pro-survival pathways, underlying molecular modulators of drug and microenvironment responses, and drug-stimulus interactions in CLL. All screening data can be explored either manually ([github.com/Huber-group-EMBL/CLLCytokineScreen2021](https://github.com/Huber-group-EMBL/CLLCytokineScreen2021)) or interactively, via the shiny app ([www.dietrichlab.de/CLL\\_Microenvironment/](http://www.dietrichlab.de/CLL_Microenvironment/)).

(B) Overview of stimuli included in the screen and summary of their associated targets. HS-5 conditioned medium is omitted, as no specific target can be shown.

(C) Table of drugs included in the screen. Drug target, and category of target are also shown.

(D - F) Pearson correlation coefficients of drug-drug and stimulus-stimulus correlations. (D) and (E) show highest drug -drug and stimulus-stimulus correlations, (F) shows selected combinations of stimuli targeting the NfKB and JAK-STAT pathways as examples of stimuli which share very similar receptors and downstream target profiles but show a divergence of effects.

Figure 2

A

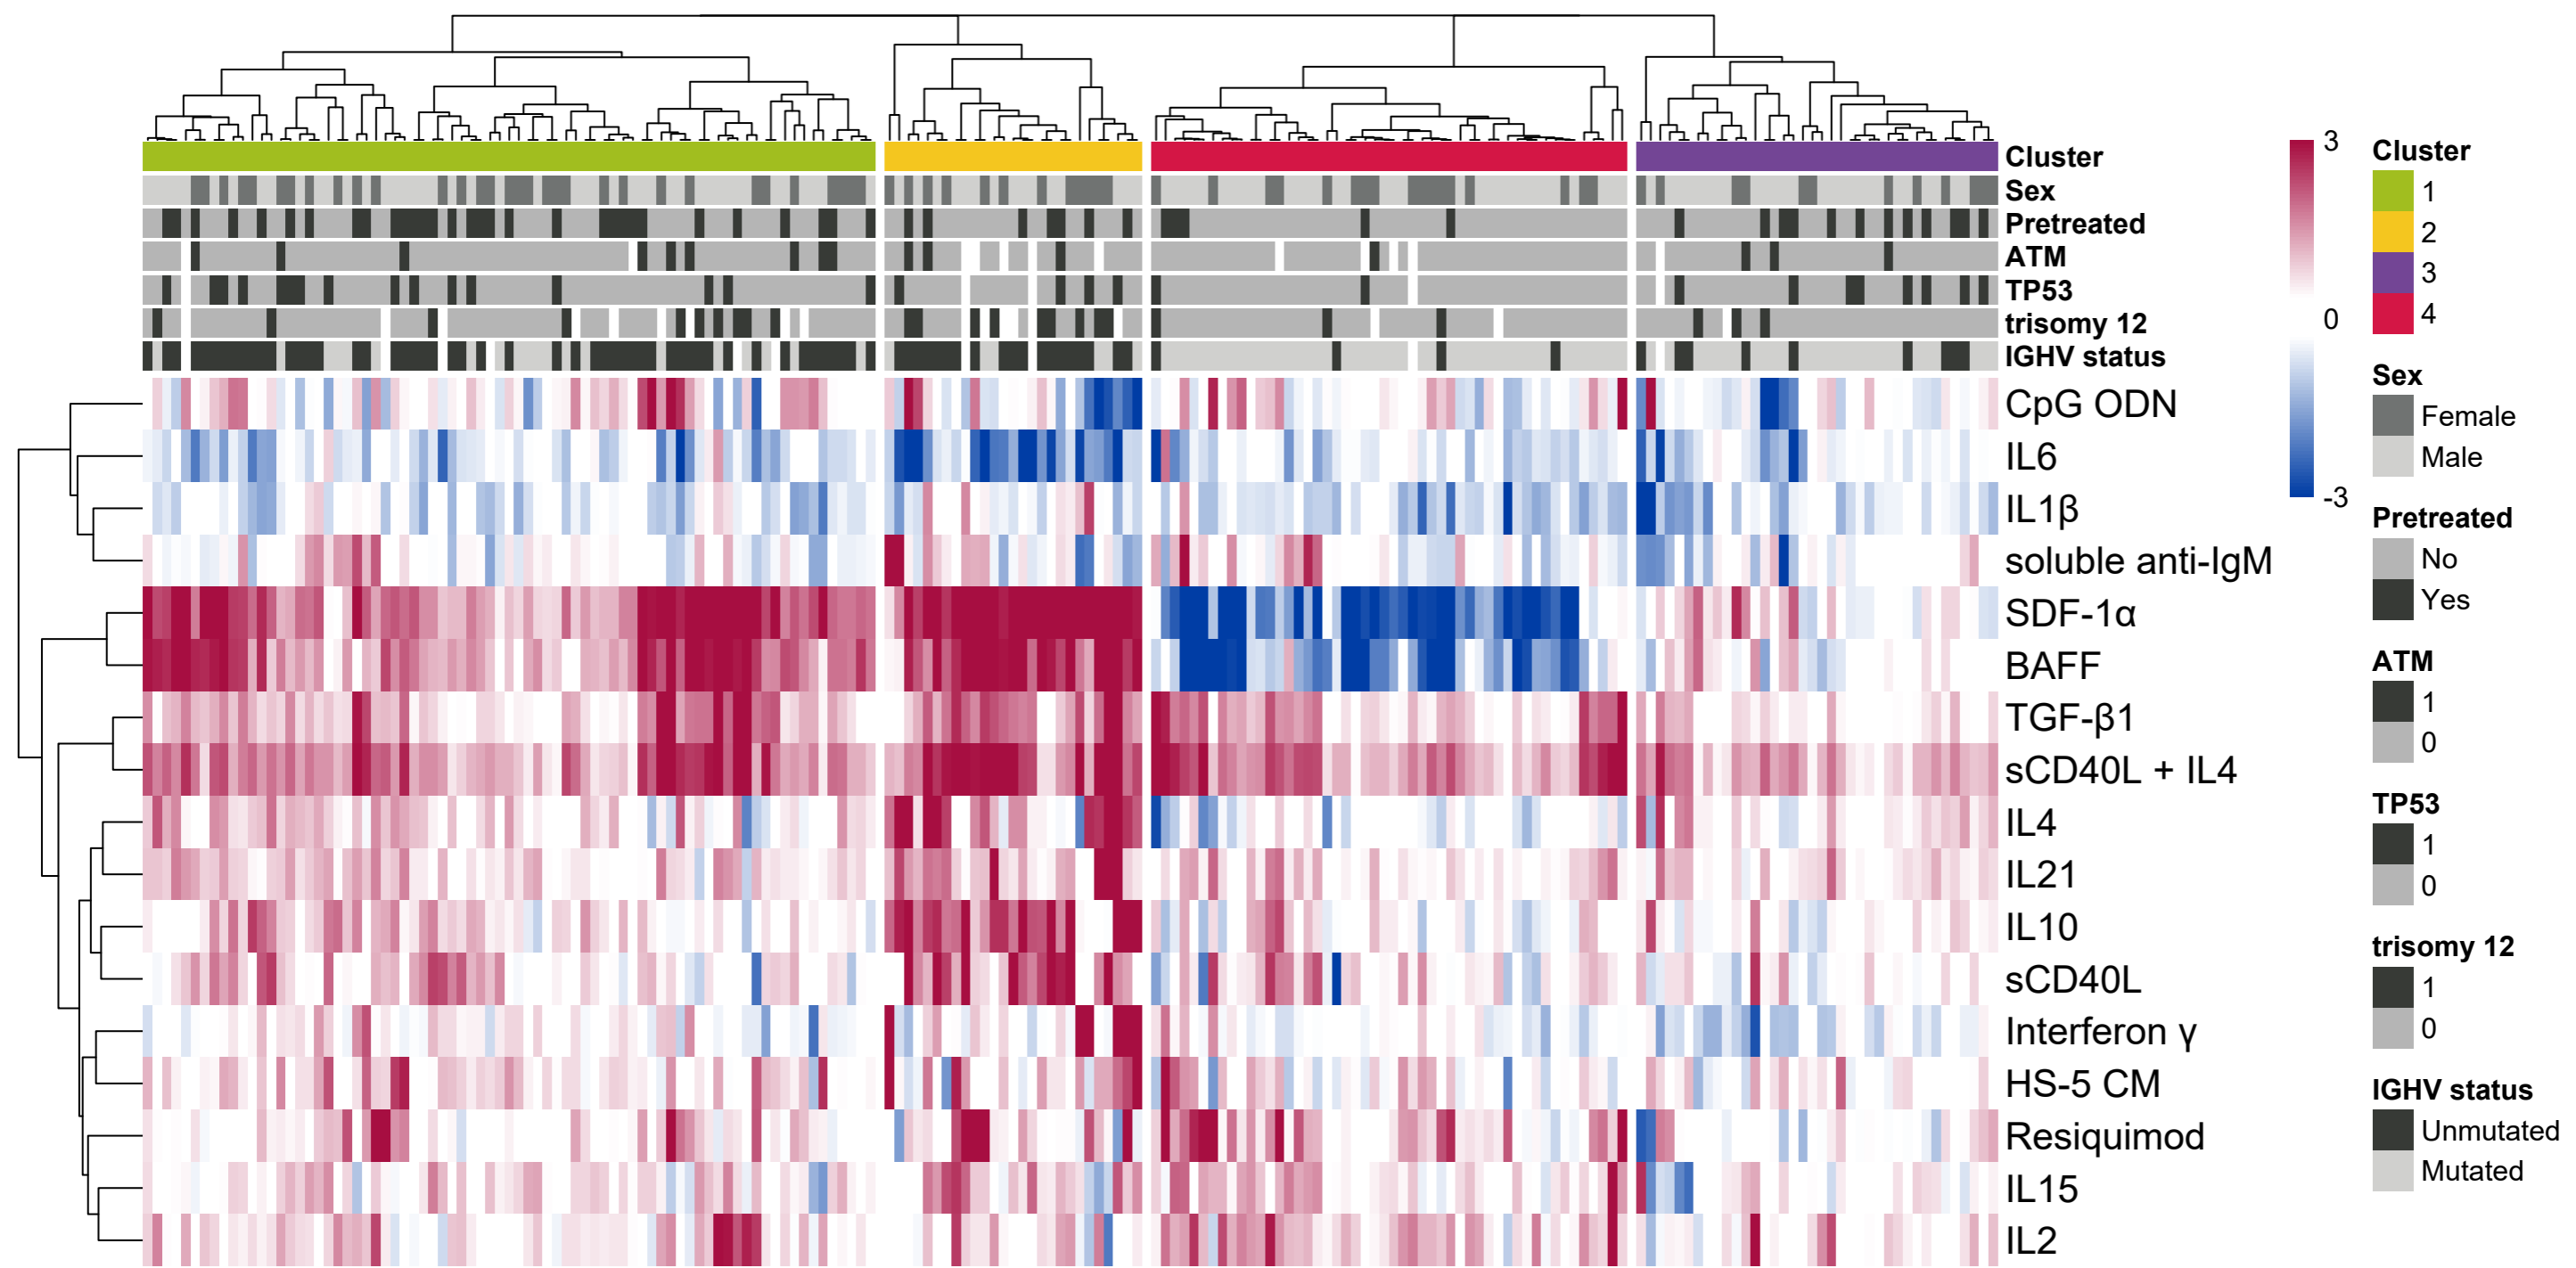

B

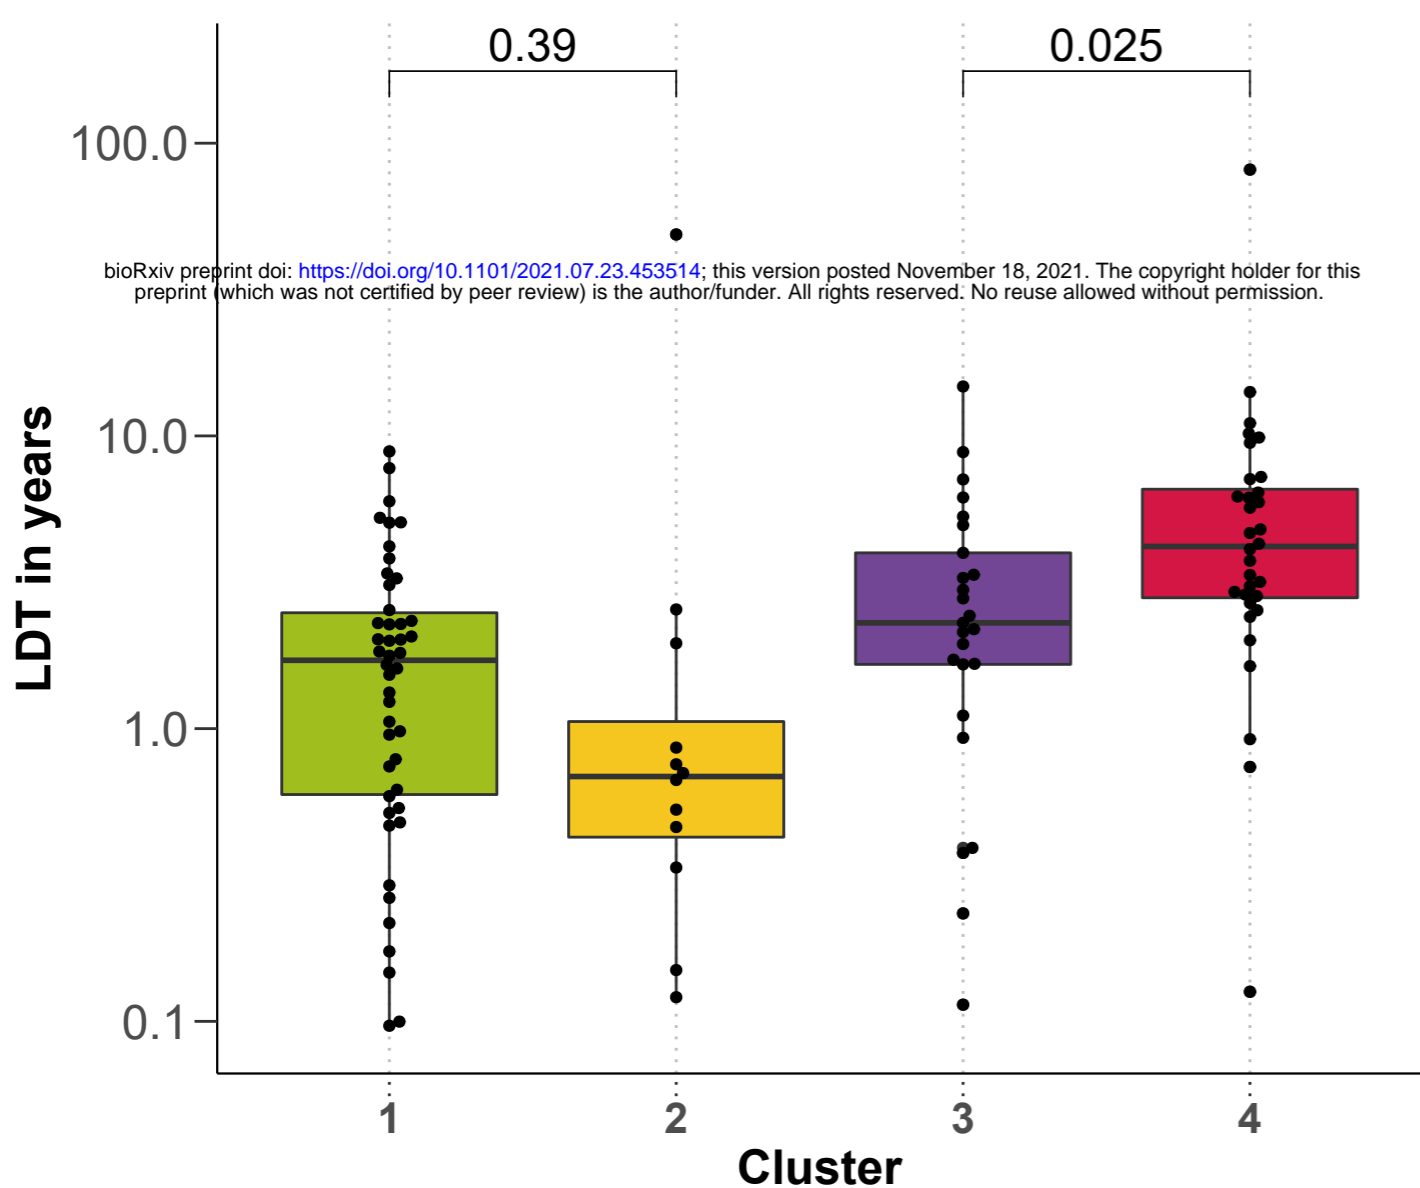

C

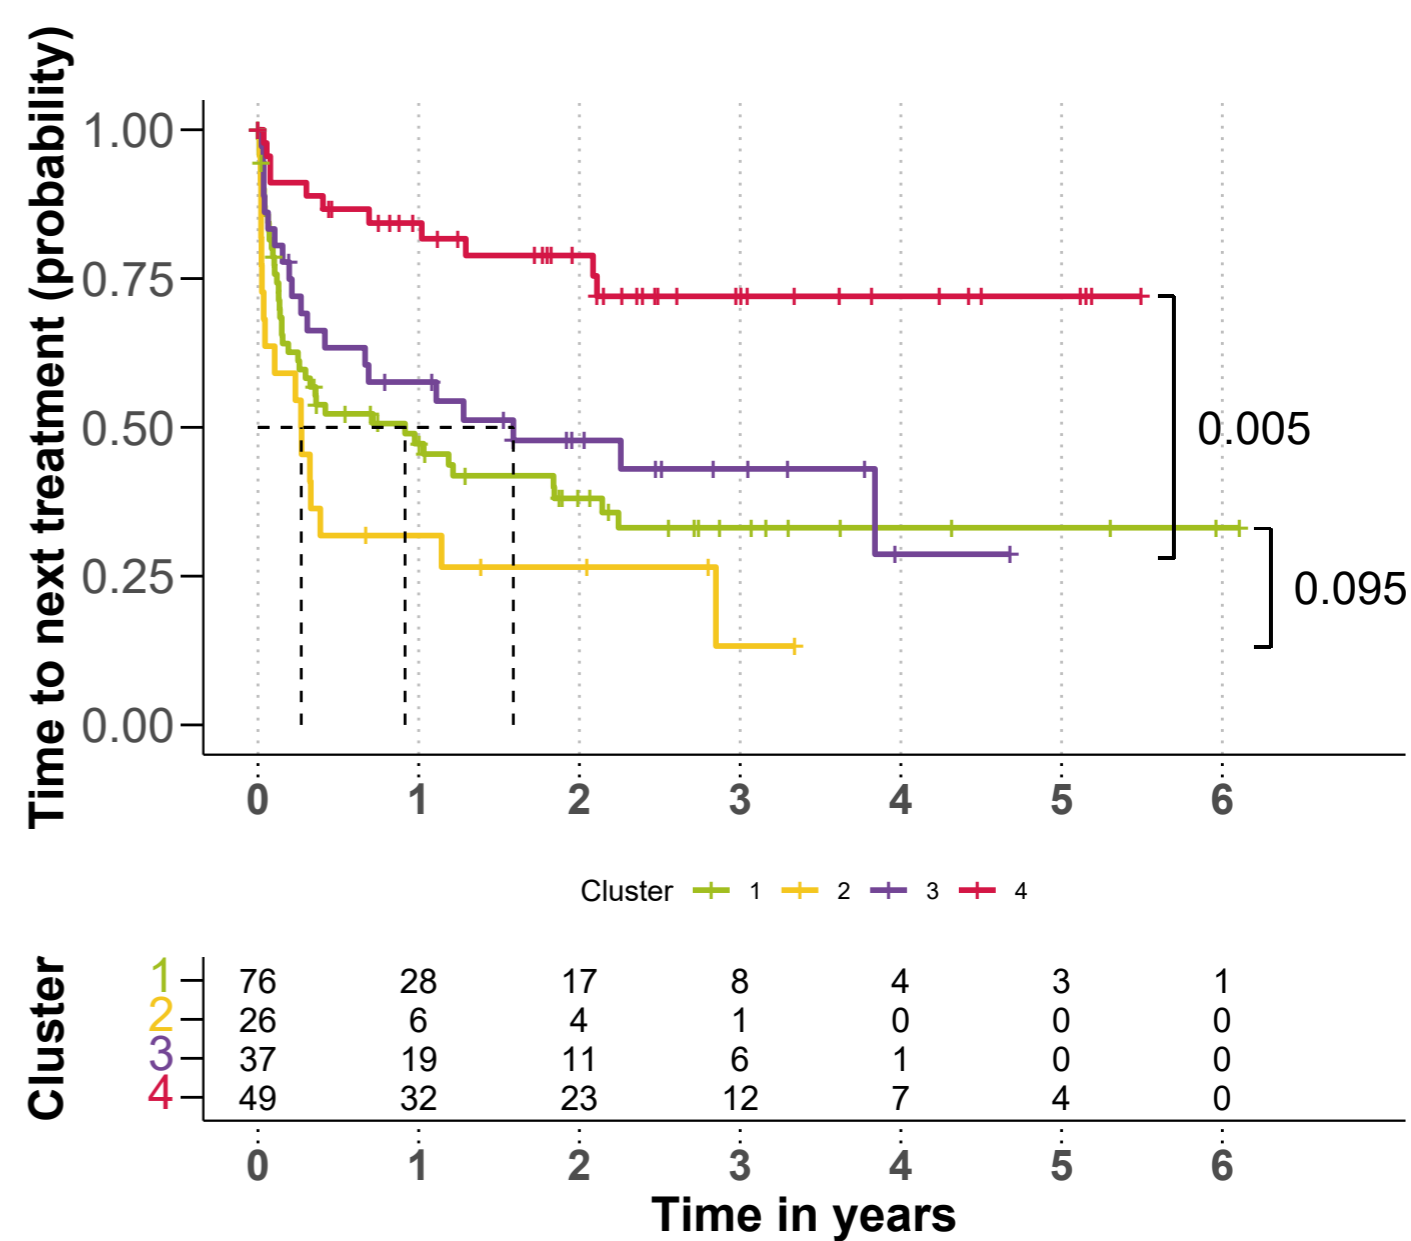

D

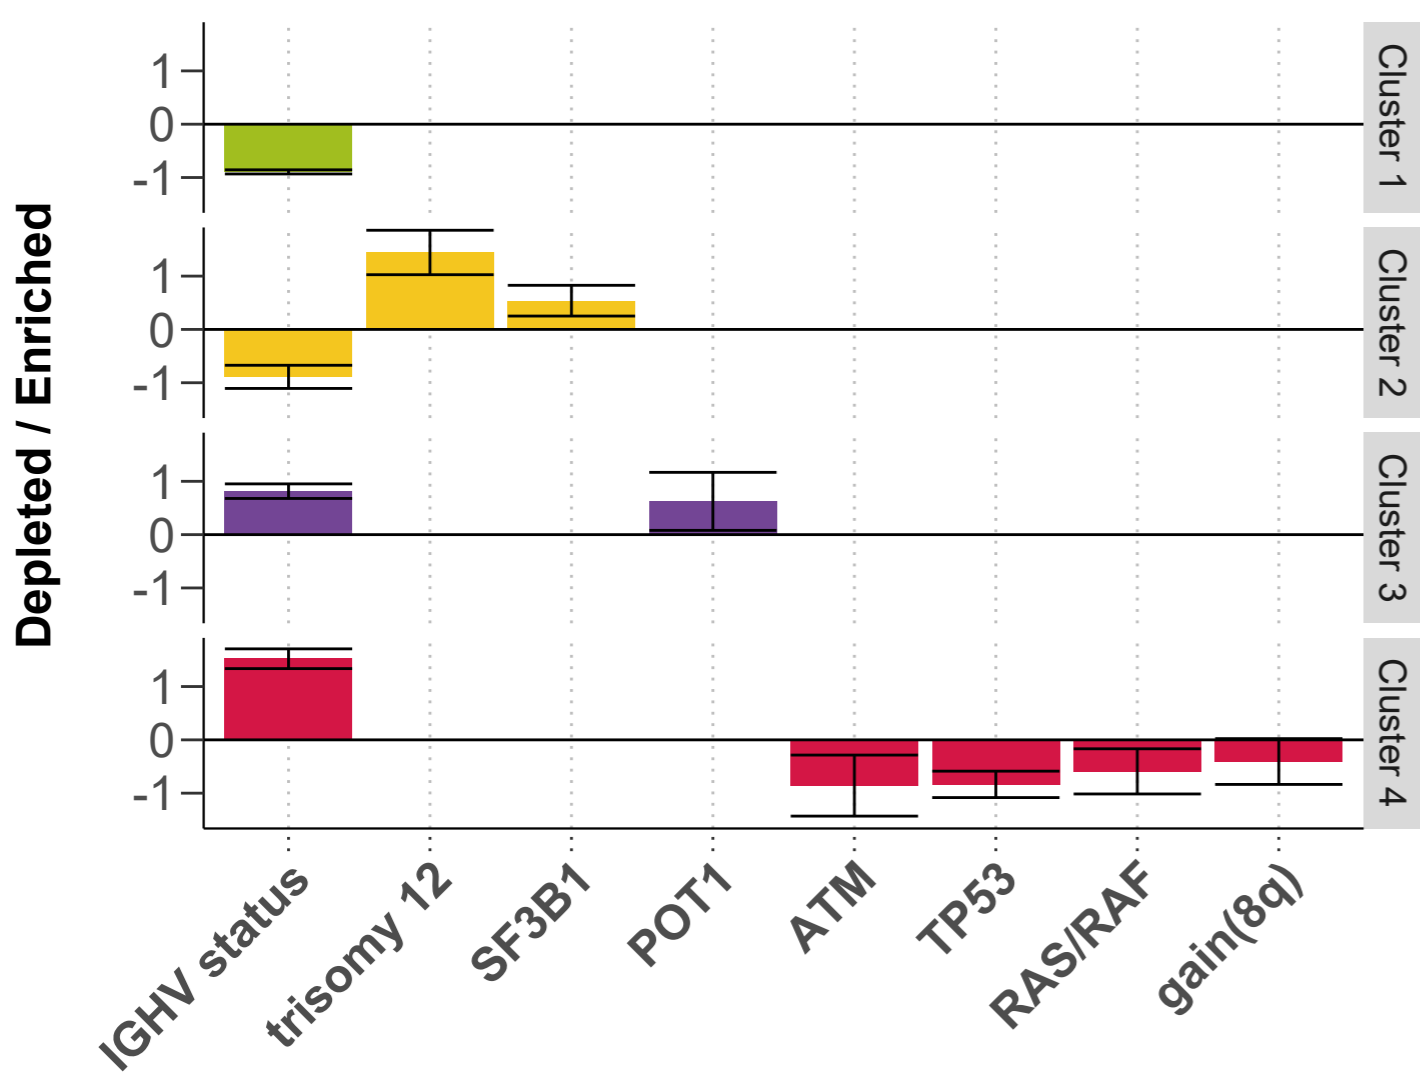

E

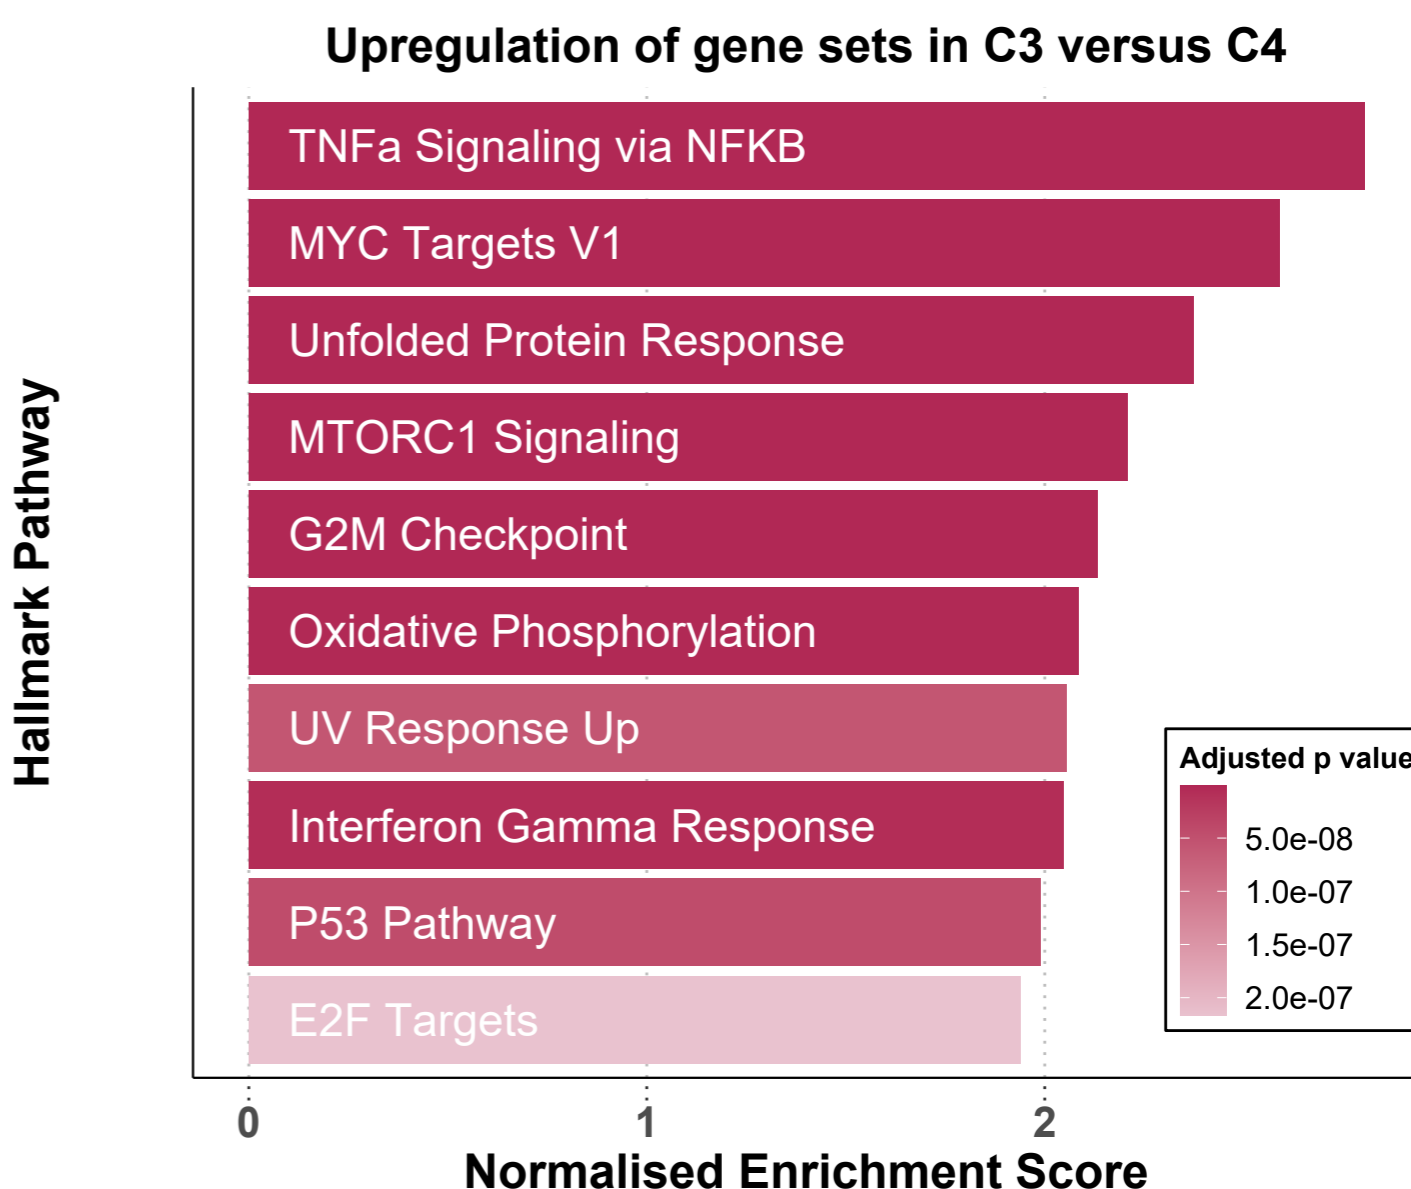

**Figure 2. Ex vivo microenvironmental response profiling reveals subgroups with distinct molecular profiles and disease progression.**

(A) Heatmap showing the viability after treatment with microenvironmental stimuli. Rows represent microenvironmental stimuli and columns represent primary CLL samples, annotated for their genetic background, sex and pre-treatment status above. Red values indicate increased viability upon treatment, blue indicates decreased viability. Data is row-scaled.

(B) Lymphocyte doubling time, a clinical marker for disease progression, plotted for each cluster. P-values from Student's t-tests.

(C) Kaplan-Meier curves of time to next treatment for each cluster. P-values from univariate Cox proportional hazard models comparing IGHV-U enriched C1 with C2, and IGHV-M enriched C3 with C4.

(D) Multinomial regression with lasso penalisation to identify enrichment or depletion of genetic features within each cluster.

(E) Gene set enrichment analysis (GSEA) comparing on expression of genes in samples from C3 and C4. Normalised enrichment scores are shown for top 10 most significant pathways upregulated in C3 versus C4.

Figure 3

A

bioRxiv preprint doi: <https://doi.org/10.1101/2021.07.23.453514>; this version posted November 18, 2021. The copyright holder for this preprint (which was not certified by peer review) is the author/funder. All rights reserved. No reuse allowed without permission.

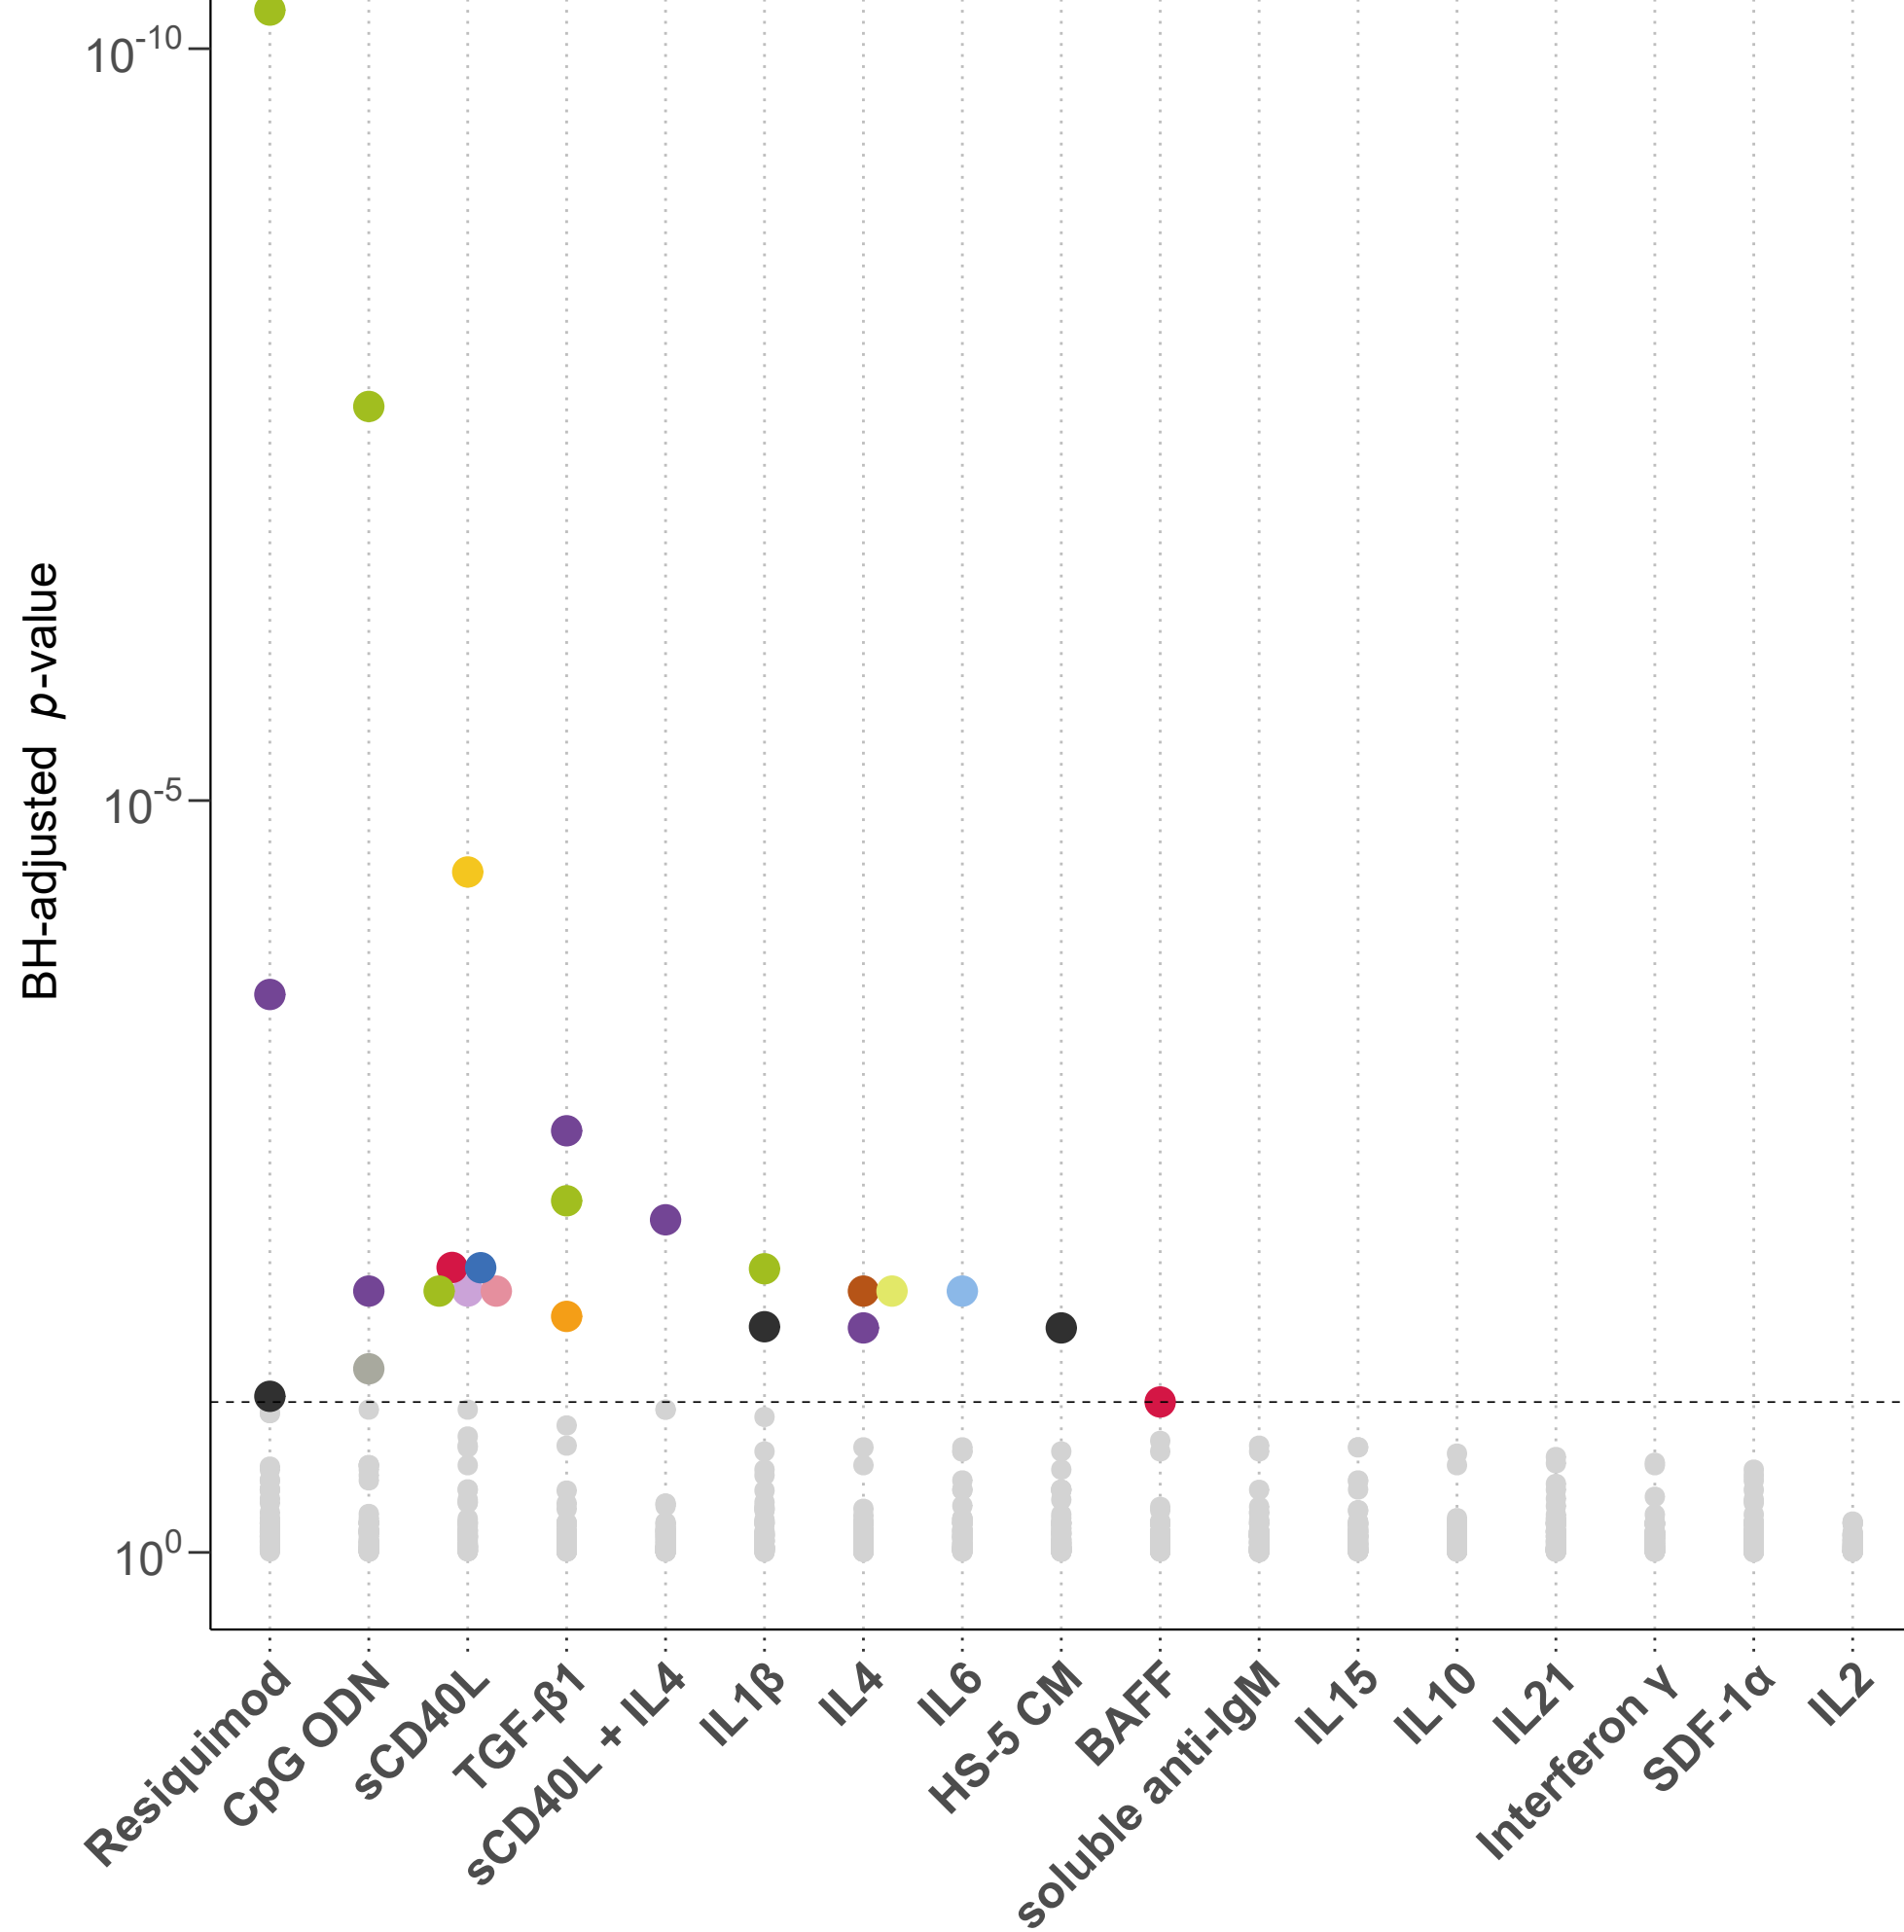

B

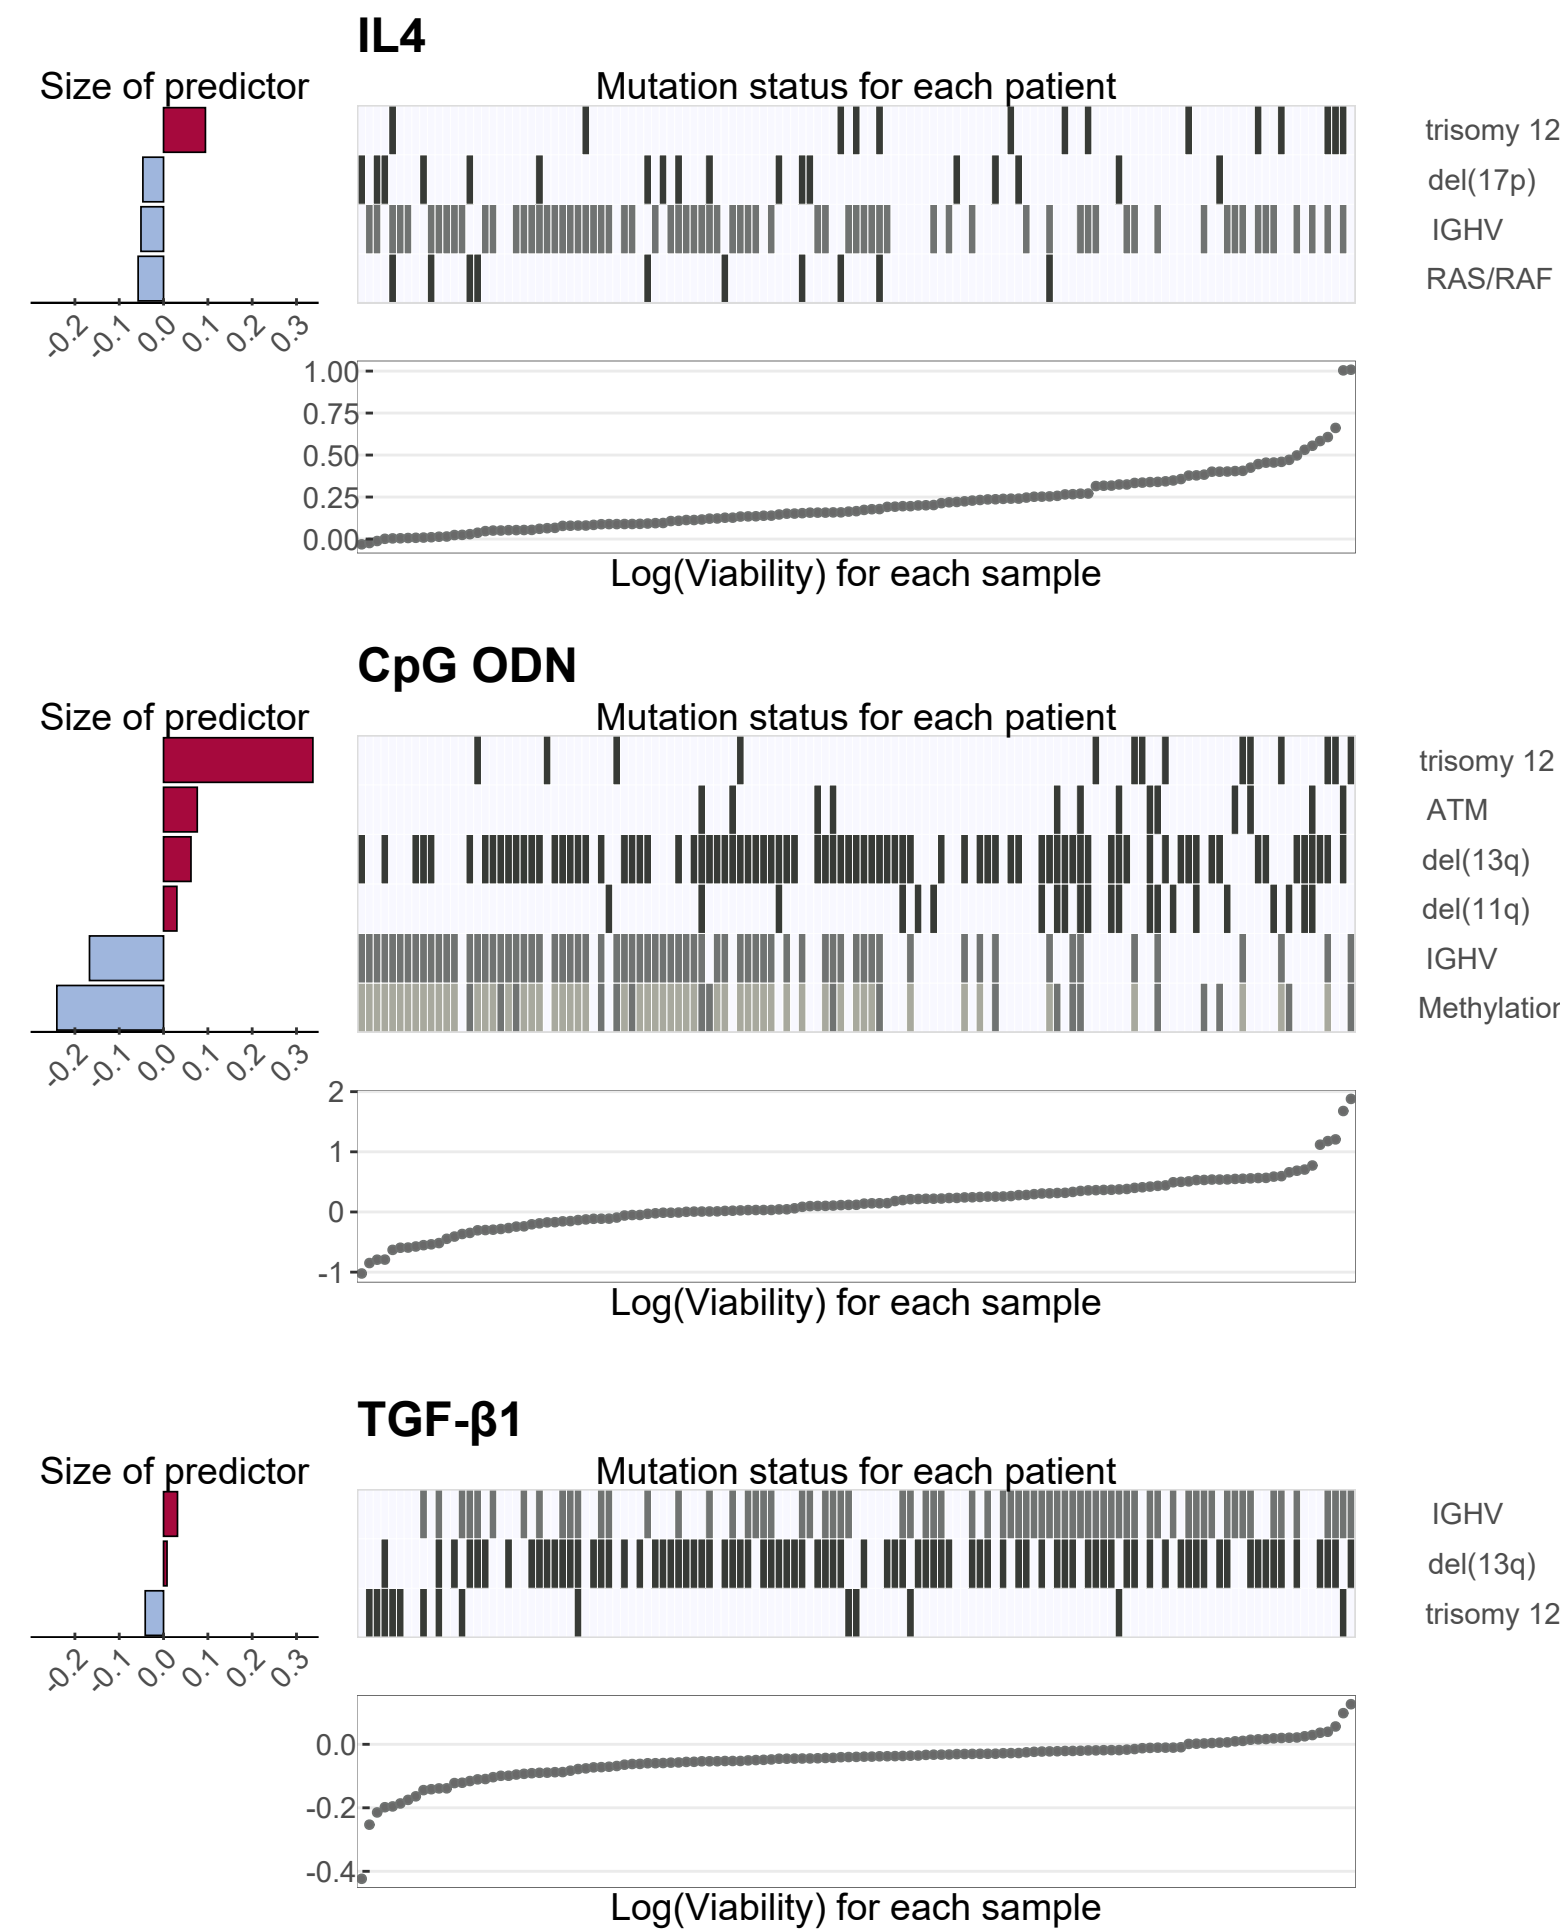



**Figure 3. Responses to microenvironmental signals are modulated by genetic alterations recurrent in CLL.**

(A) Overview of results of all tested gene - stimulus associations. x-axis shows stimuli, y-axis shows p-values from Student's t-test (two-sided, with equal variance). Each dot represents a gene-stimulus association. Tests with p-values smaller than the threshold corresponding to a false discovery rate (FDR) of 10% (method of Benjamini and Hochberg) are indicated by coloured circles, where the colours represent the gene mutations and structural aberrations.

(B) Predictor profiles for selected stimuli to represent gene - stimulus associations identified through Gaussian linear modelling with L1-penalty. Within the plots, the bar plots on the left indicate size and sign of coefficients assigned to the named predictors. Positive coefficients indicate higher viability after stimulation if the feature is present. Scatter plots indicate log(viability) values, in order of magnitude, for each individual sample. Heatmaps show mutation status for each of the genetic predictors for the corresponding samples in the scatter plot.

Figure 4

A

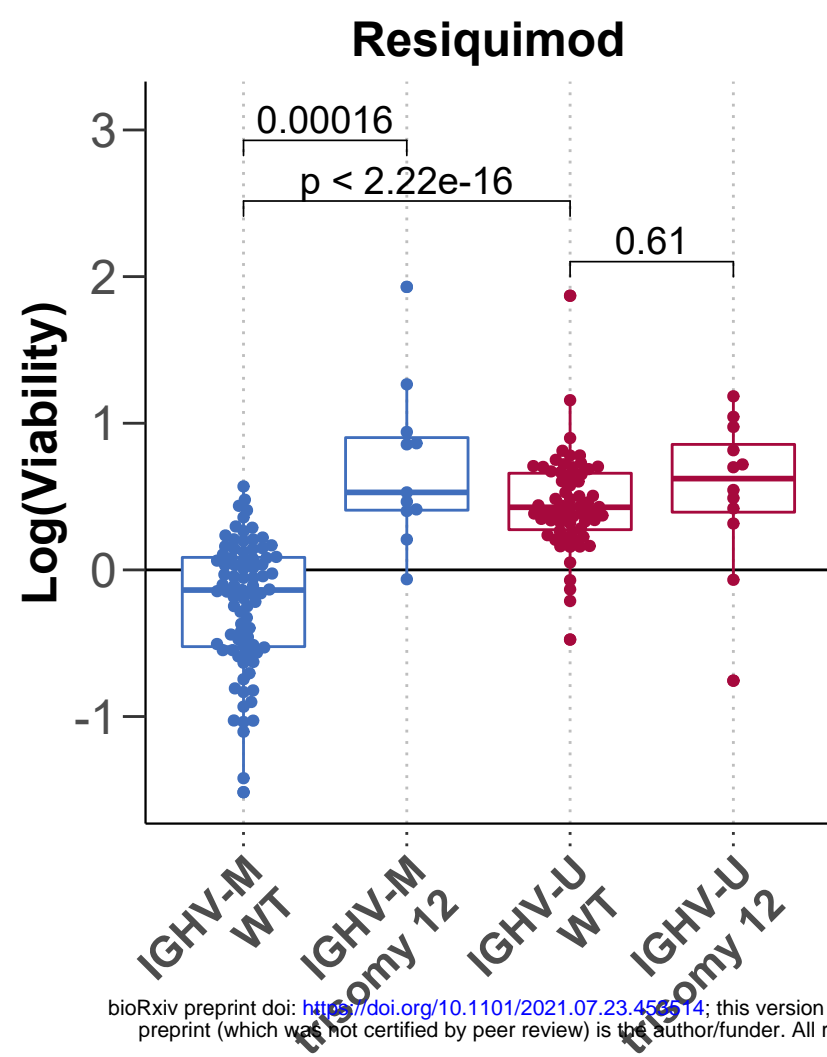

B

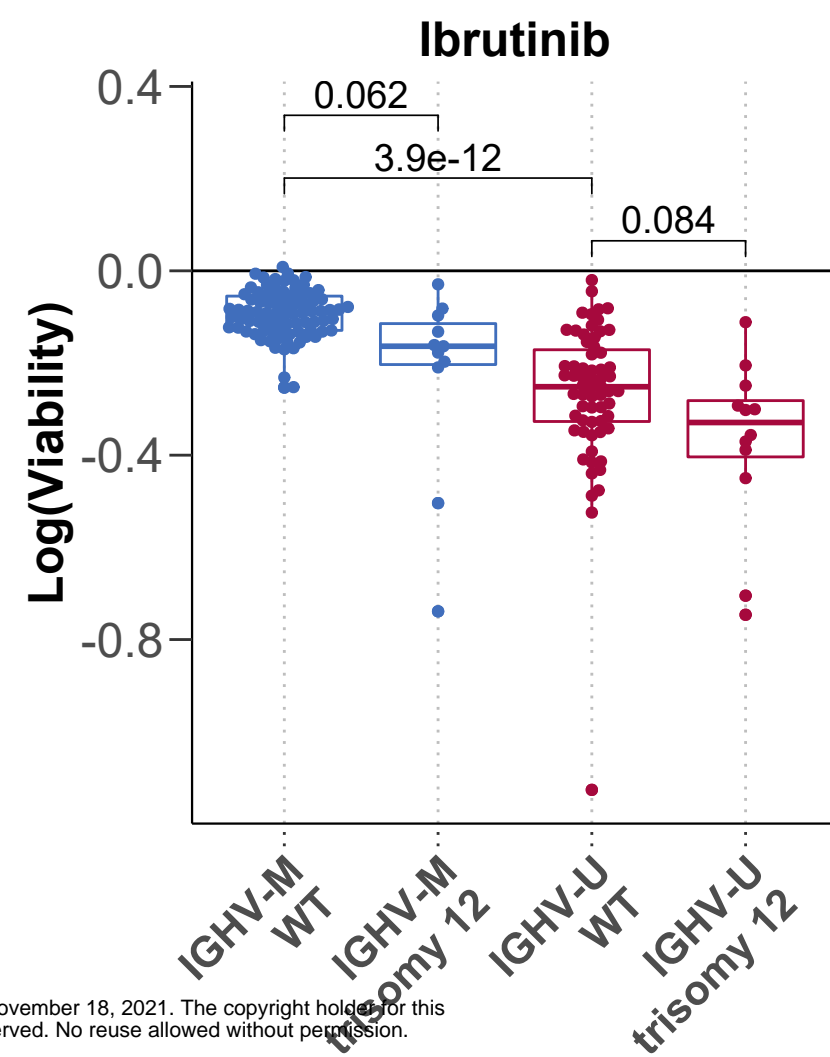

C

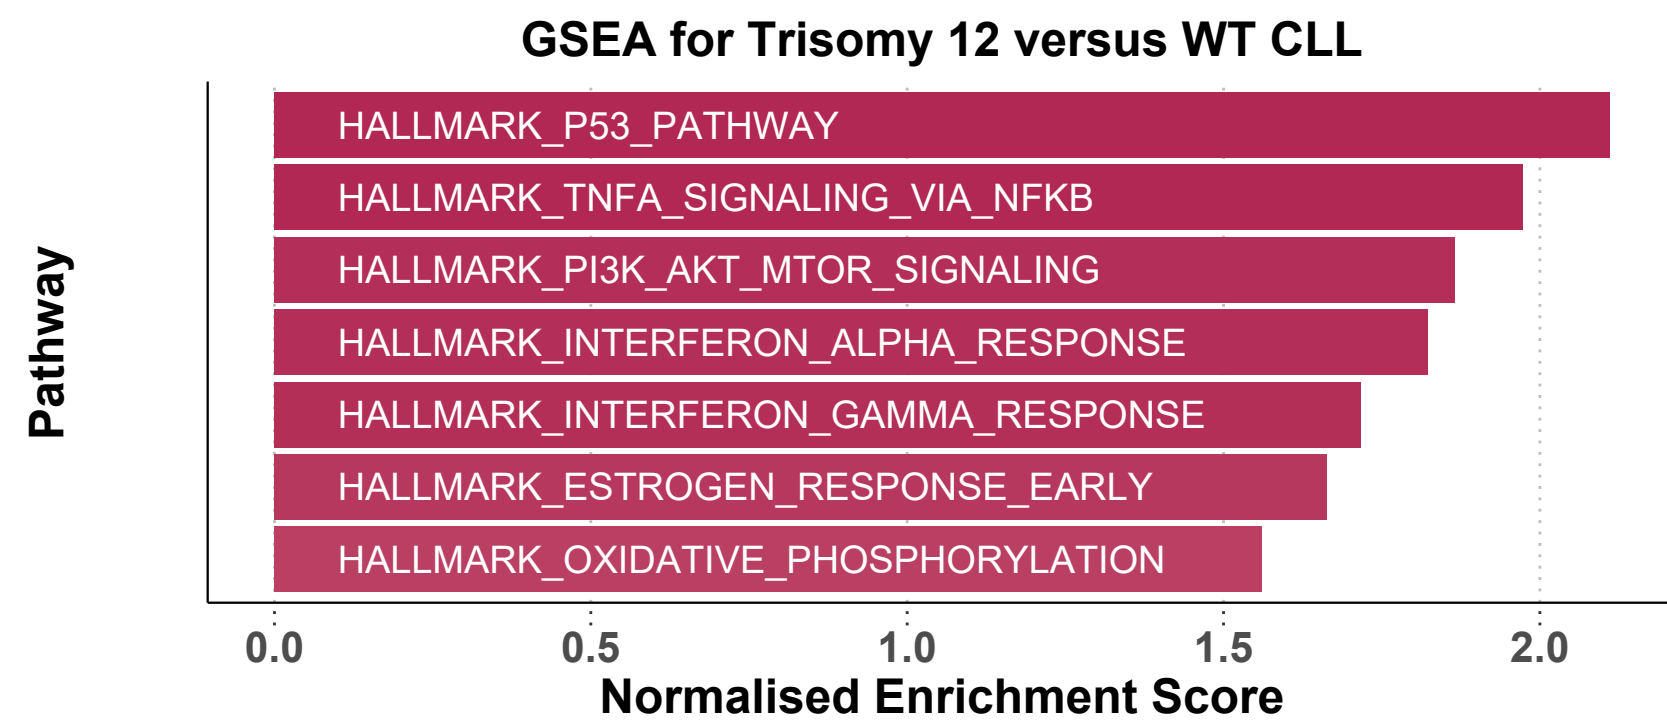

D

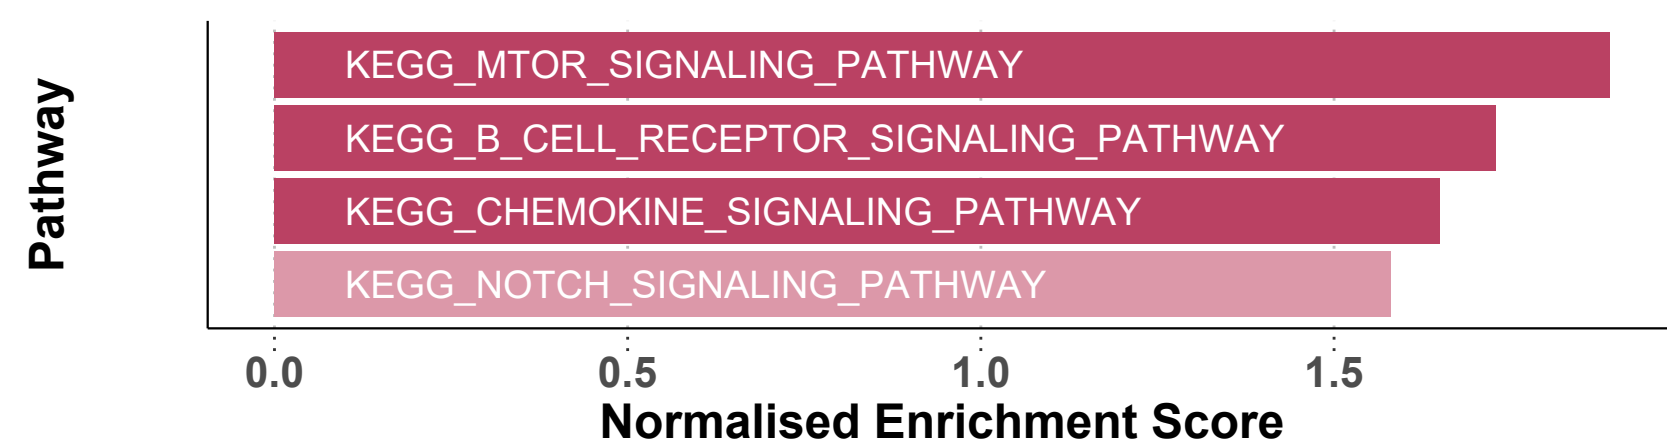

E

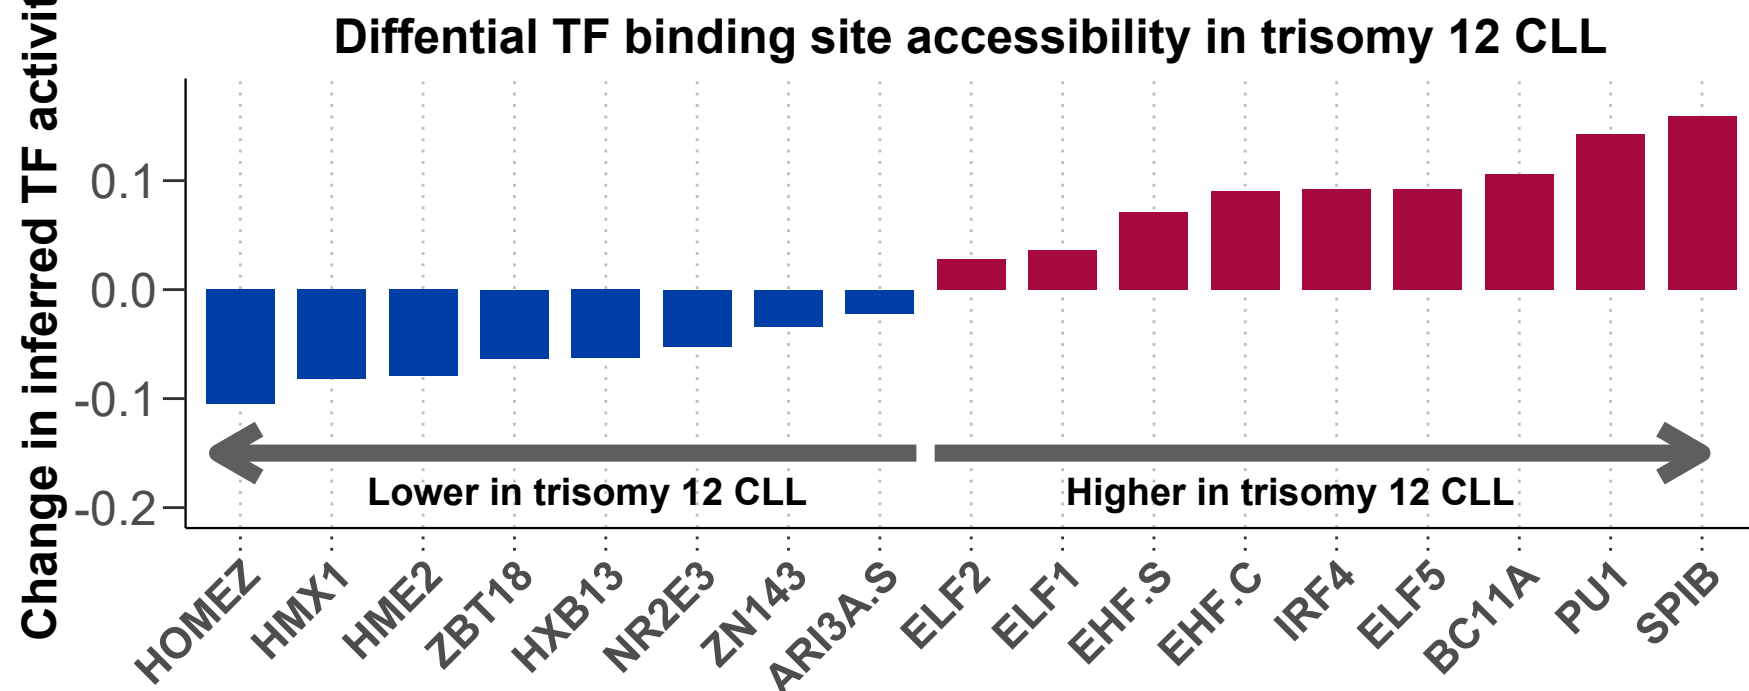

F

Adjusted p value

| Pathway                               | Geneset Database | Geneset Size | Spi-B targets (/3253) | SPIB p-value |
|---------------------------------------|------------------|--------------|-----------------------|--------------|
| BCR Signaling Pathway                 | KEGG             | 75           | 36                    | 0.000        |
| TLR Signaling Pathway                 | KEGG             | 102          | 40                    | 0.000        |
| Signaling by TGFbeta Receptor Complex | Reactome         | 73           | 26                    | 0.007        |

G

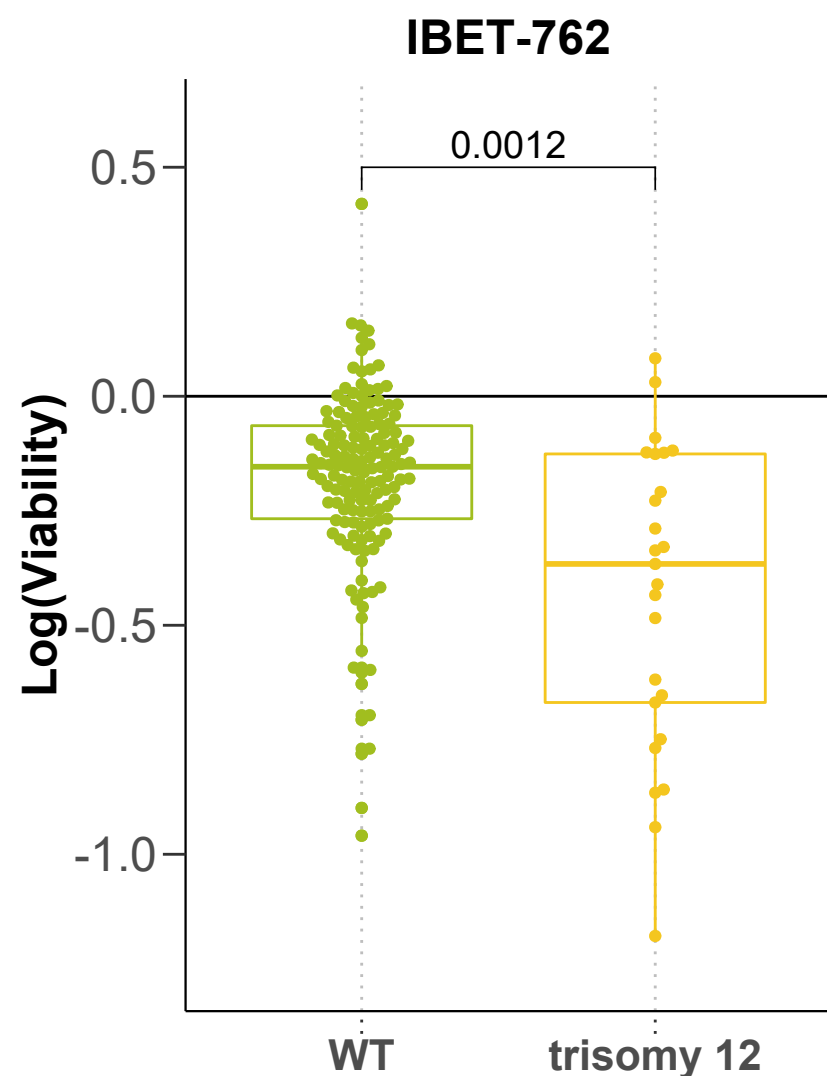

H

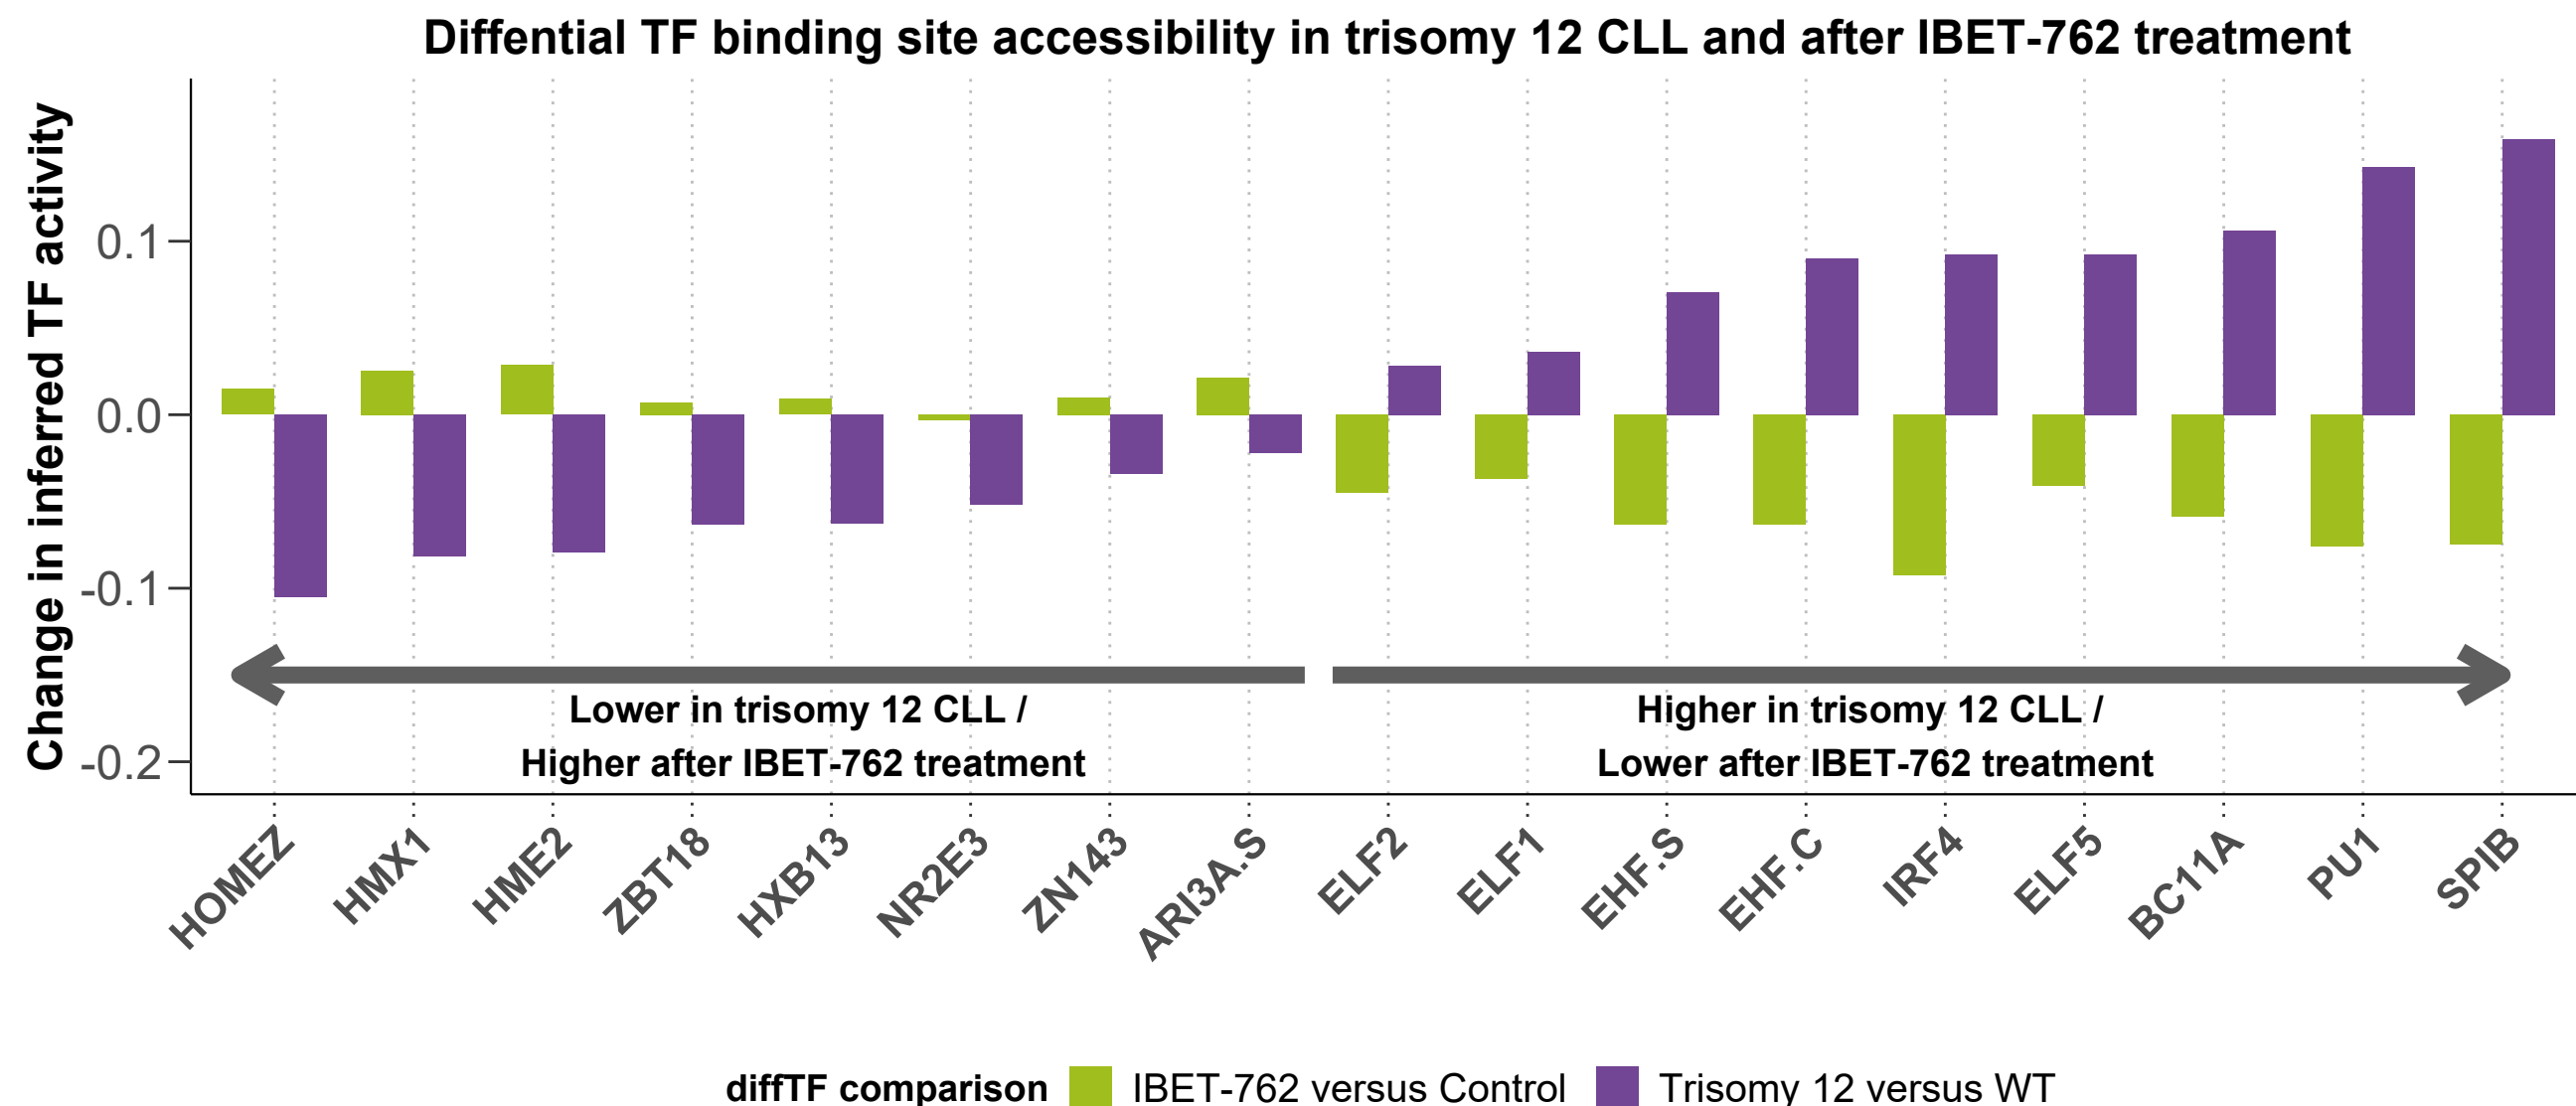

#### **Figure 4. Trisomy 12 modulates responses to microenvironmental signals.**

(A+B) Log normalised viability after treatment with resiquimod (TLR 7/8 stimulus) (A) and ibrutinib (B) in the genetic subgroups of IGHV status and trisomy 12. P-values from Student's t-tests.

(C+D) GSEA comparing trisomy 12 samples to non-trisomy 12 samples in Hallmark genesets (C) and selected KEGG genesets of microenvironmental signalling pathways (D).

(E) Differential TF accessibility (y axis) between trisomy 12 (n = 9) and non-trisomy 12 (n = 43) samples, data taken from Rendeiro et al<sup>32</sup>. TFs with adjusted p-value <0.05 are shown and ordered by change in inferred TF activity (x-axis). Spi-B and PU.1 TF binding sites show higher accessibility in trisomy 12 CLL.

(F) Over-representation tests of selected KEGG and Reactome pathways in ChIPseq analysis of Spi-B binding in lymphoma cell lines indicates involvement in coordinating transcriptional response to microenvironmental signals, including BCR and TLR signalling.

(G) Log normalised viability after treatment with the bromodomain inhibitor IBET-762 in trisomy 12 and non-trisomy 12 samples. P-value from Student's t-tests.

(H) Differential TF binding site accessibility (y axis) in trisomy 12 vs non-trisomy 12 CLL samples (purple) and for IBET-762 vs DMSO treated CLL samples (green). Direction of differential accessibility values are shown for two independent datasets comparing trisomy 12 vs non-trisomy 12 CLL and IBET-762 vs control-treated CLL, for all TFs with adjusted p value <0.05 in the trisomy 12 comparison. Absolute change in TF accessibility can not be compared between the two experiments.

Figure 5

A

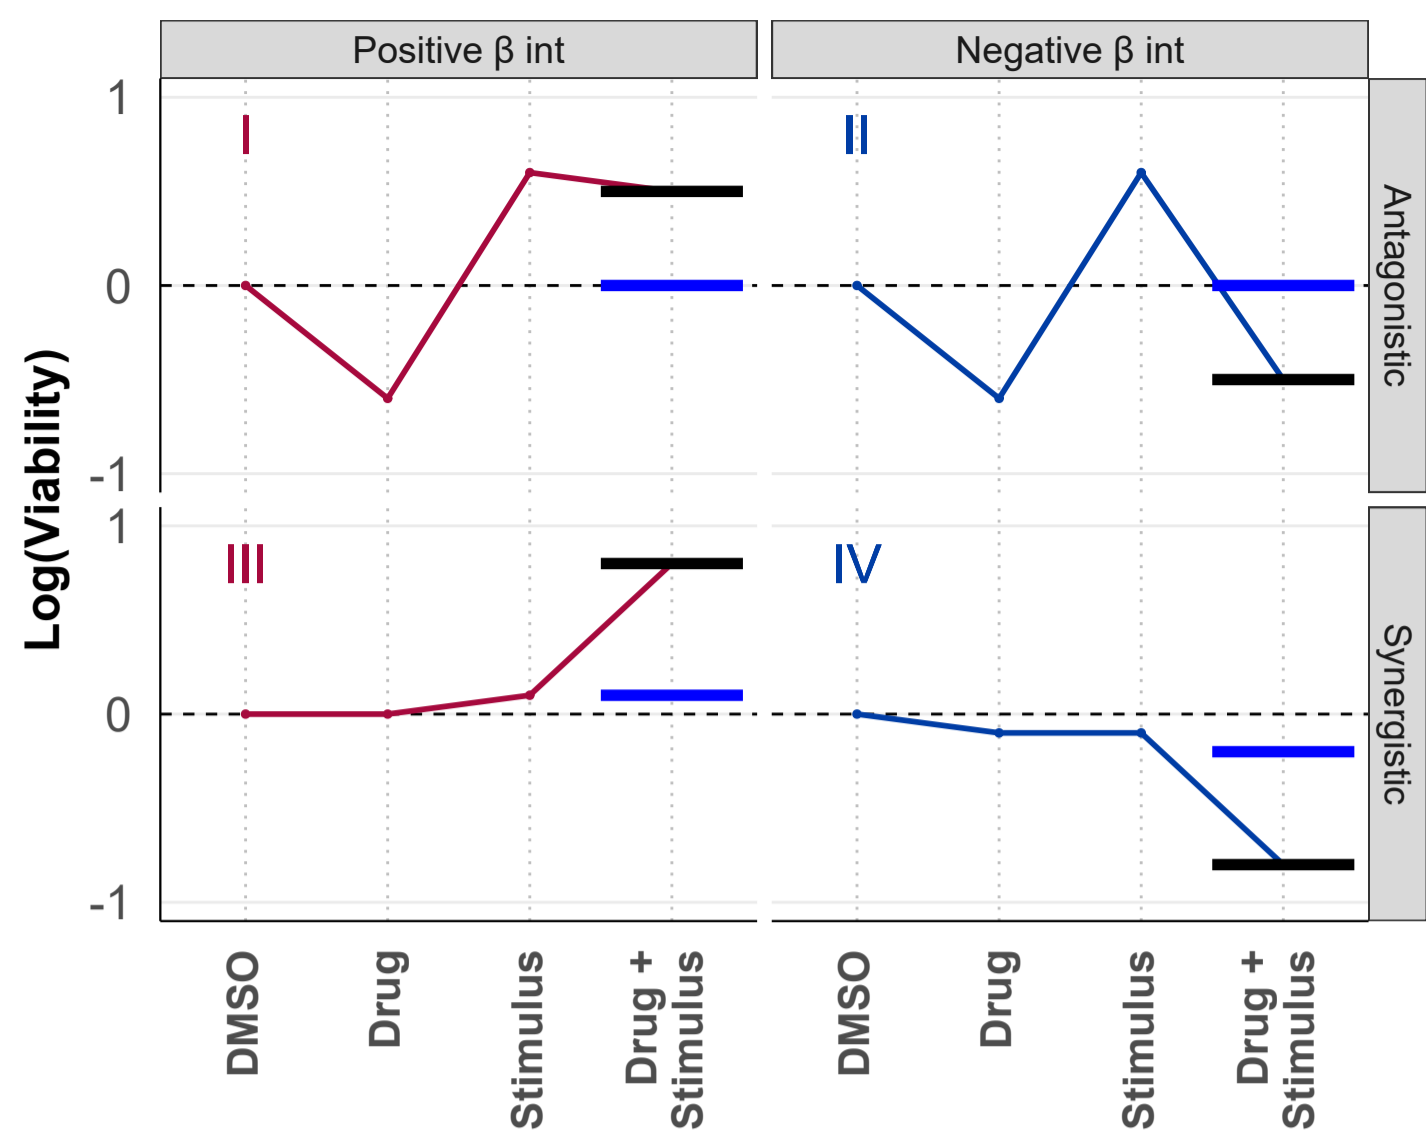

B

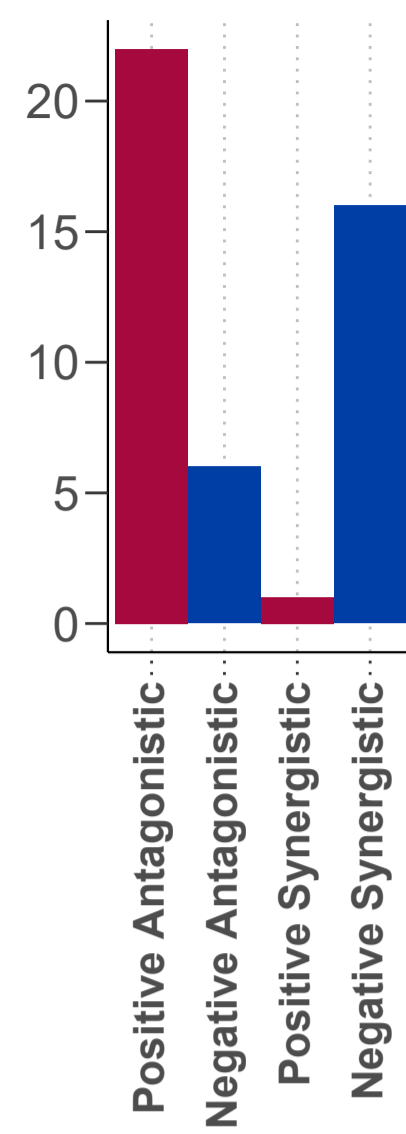

C

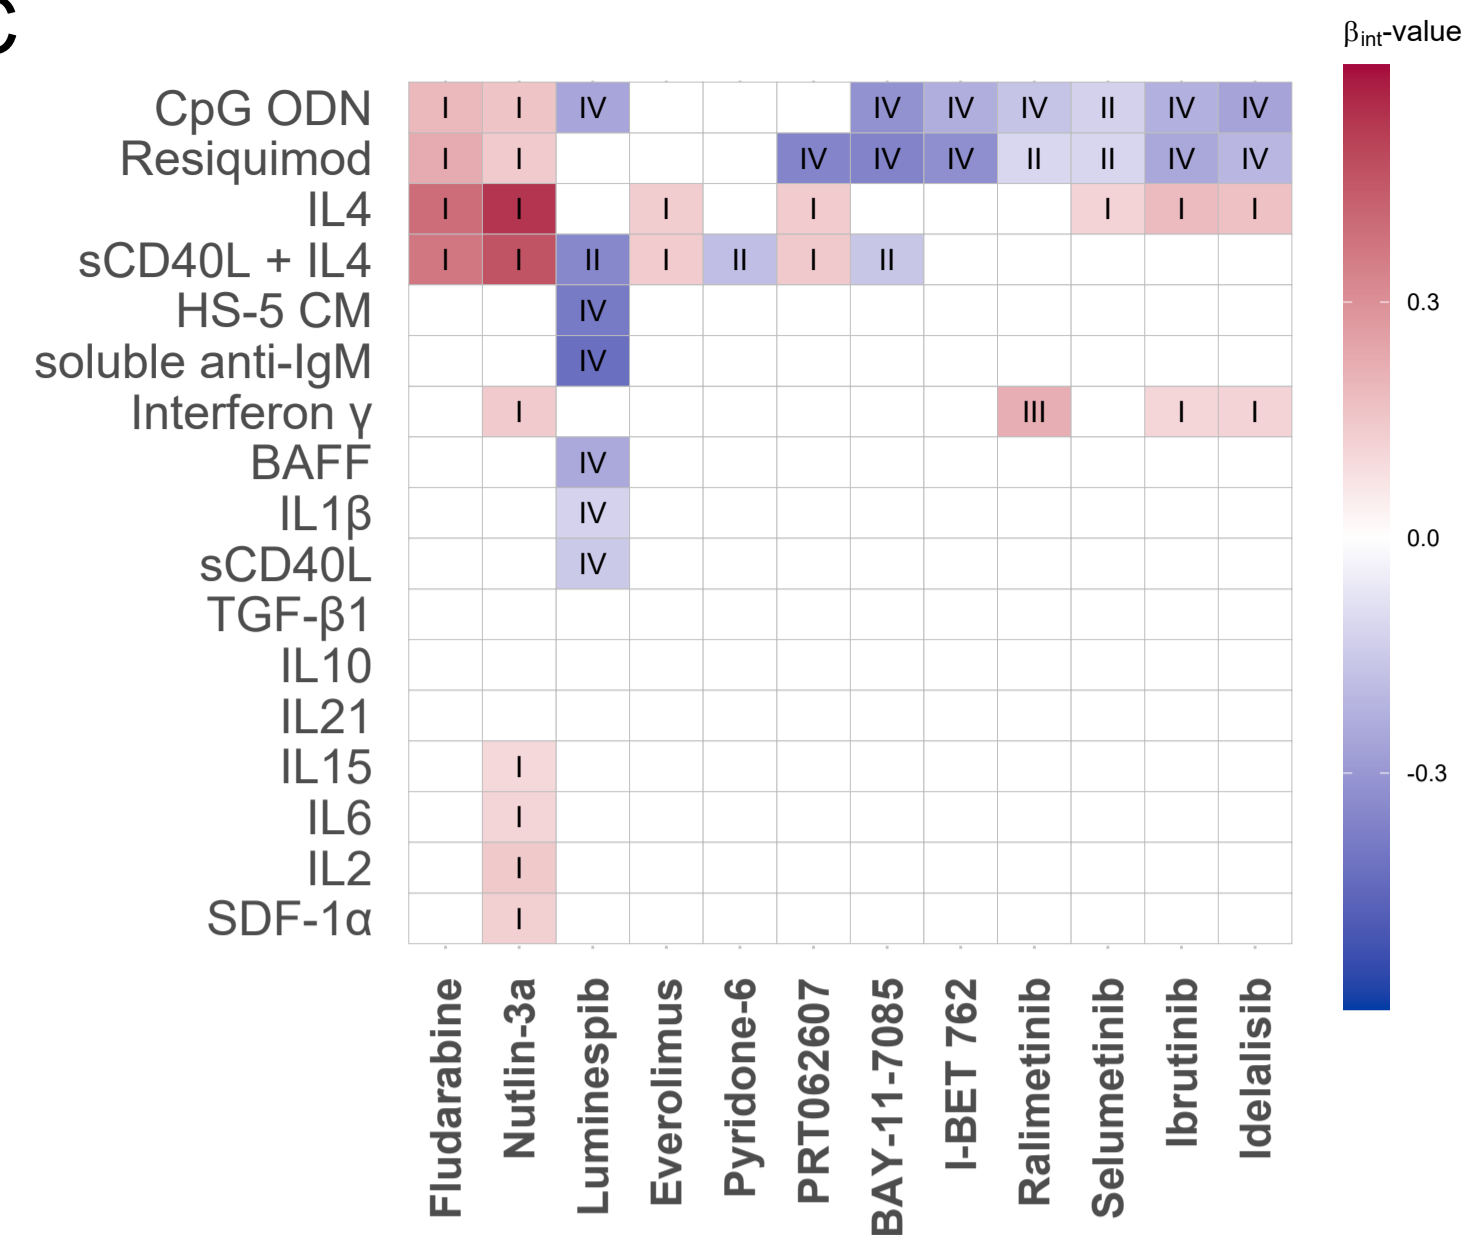

D

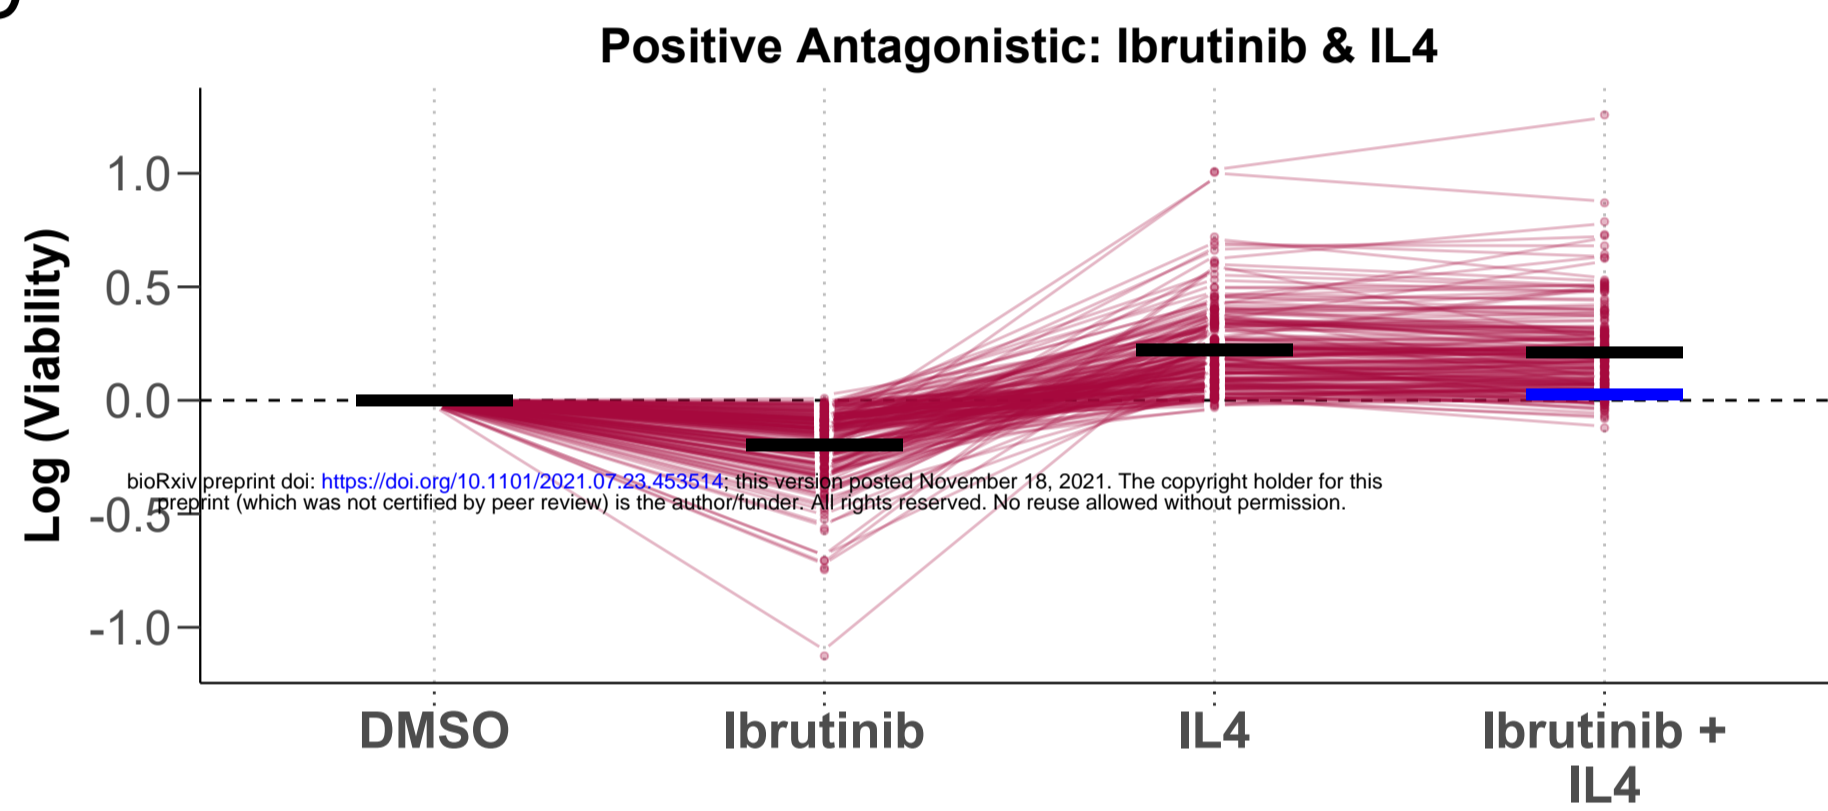

E

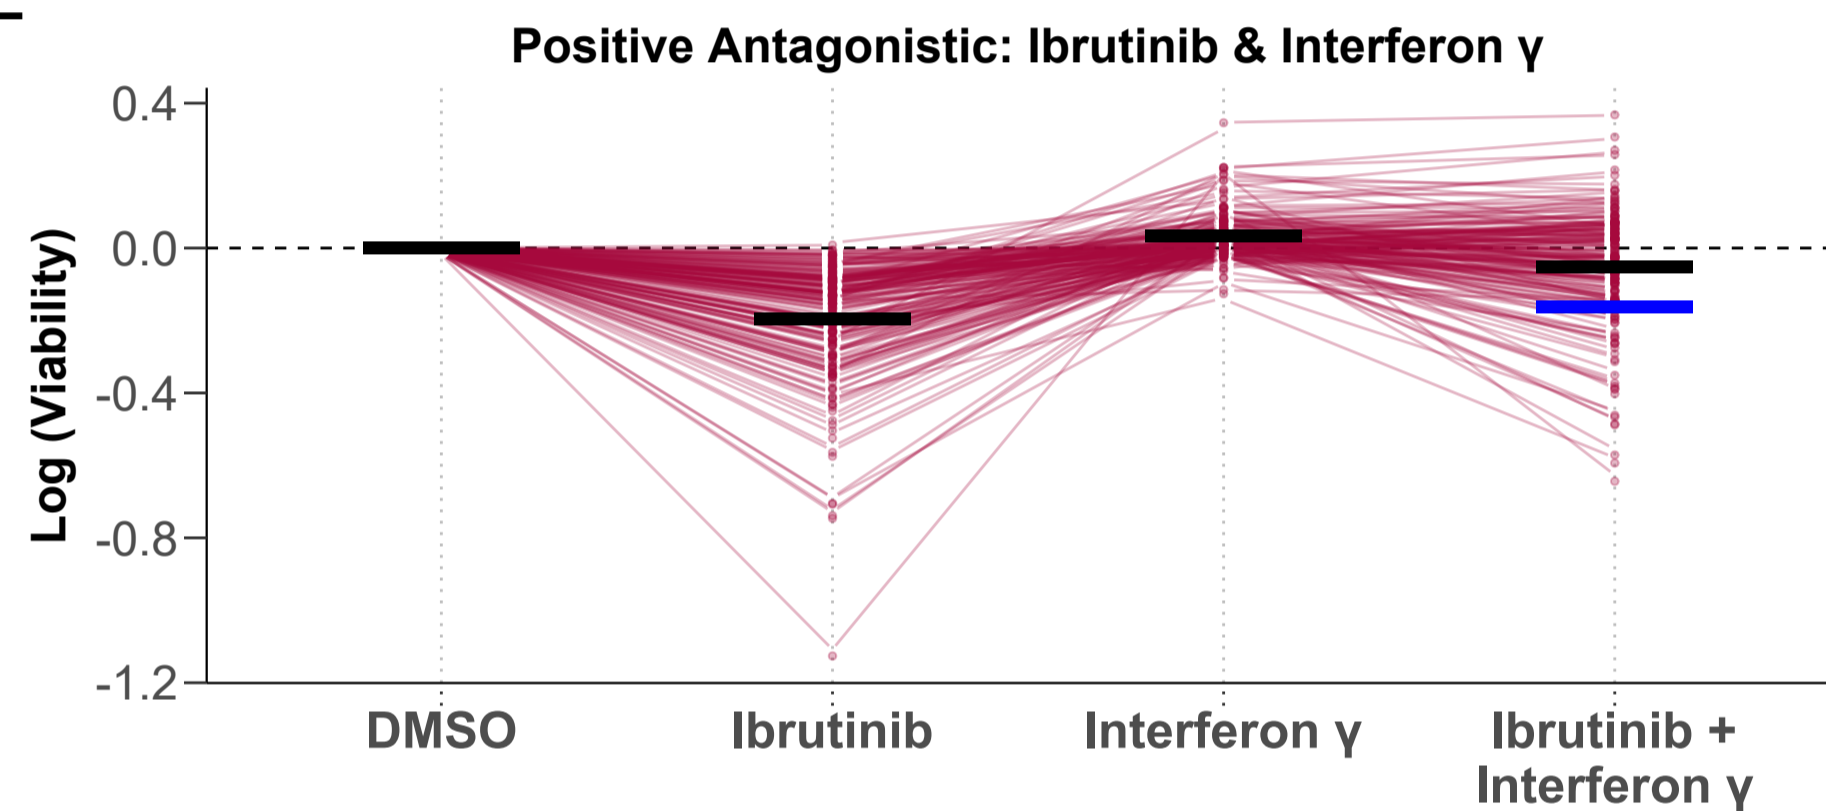

F

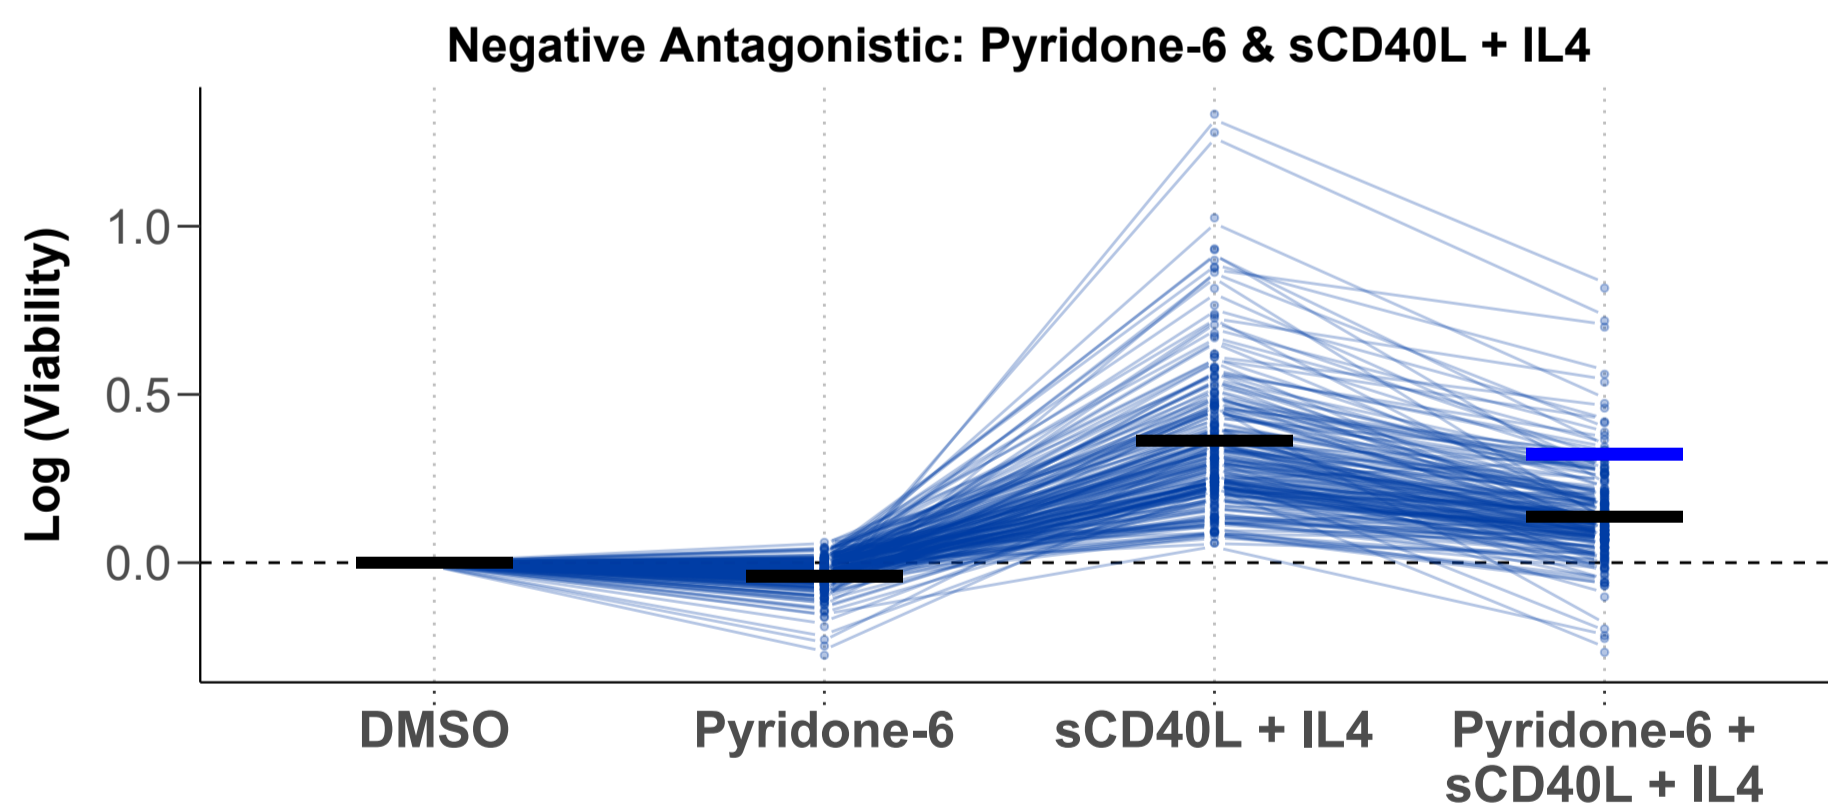

G

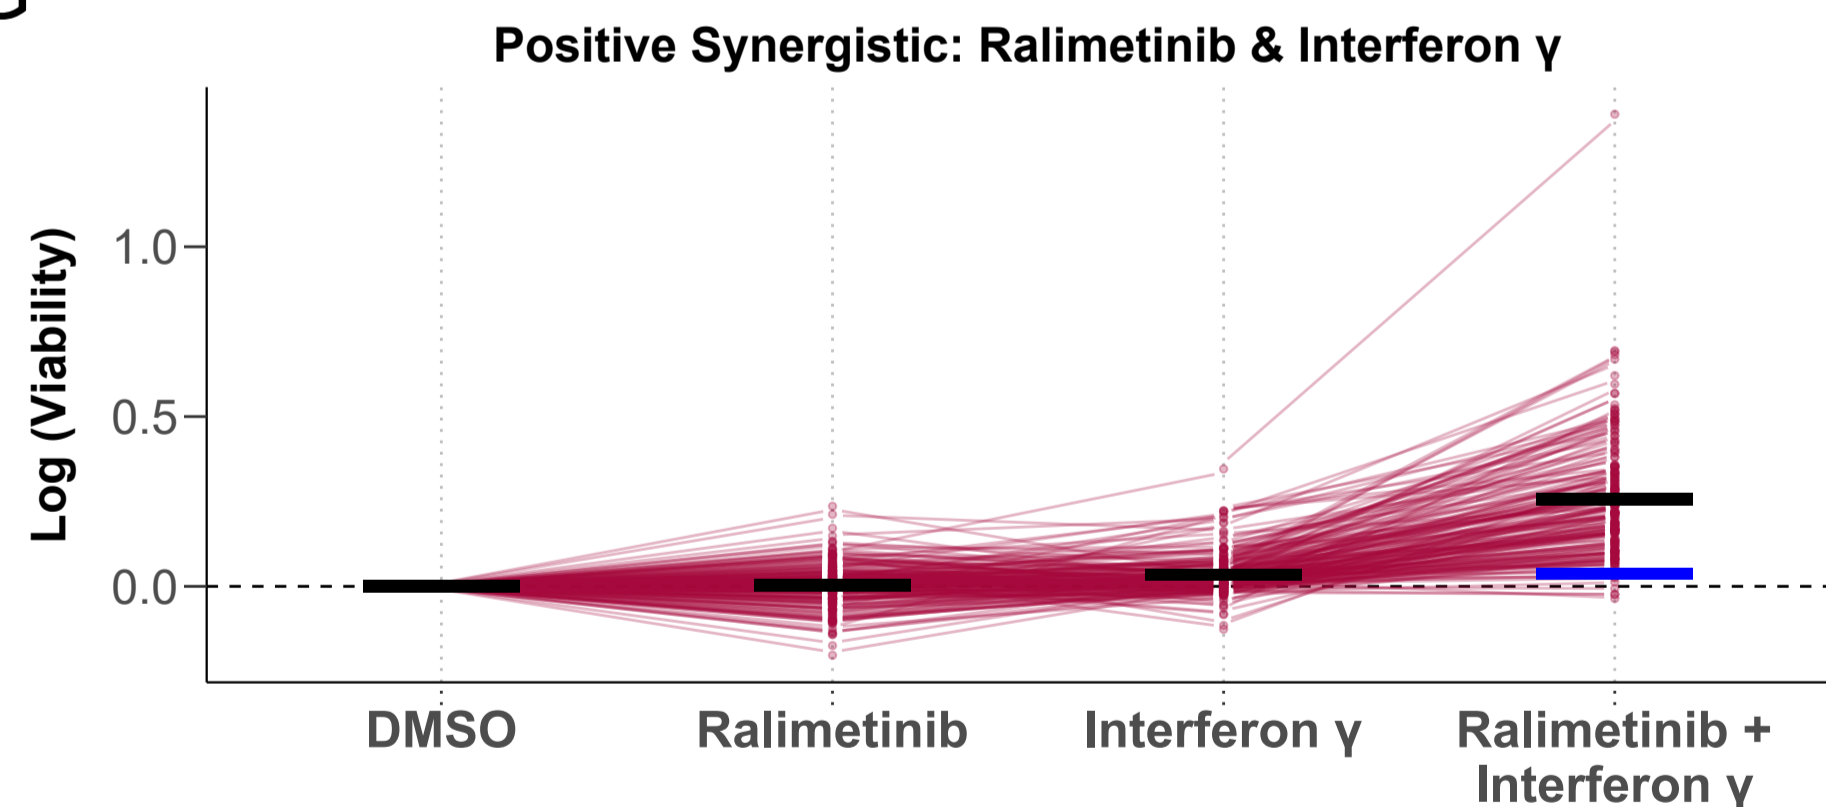

H

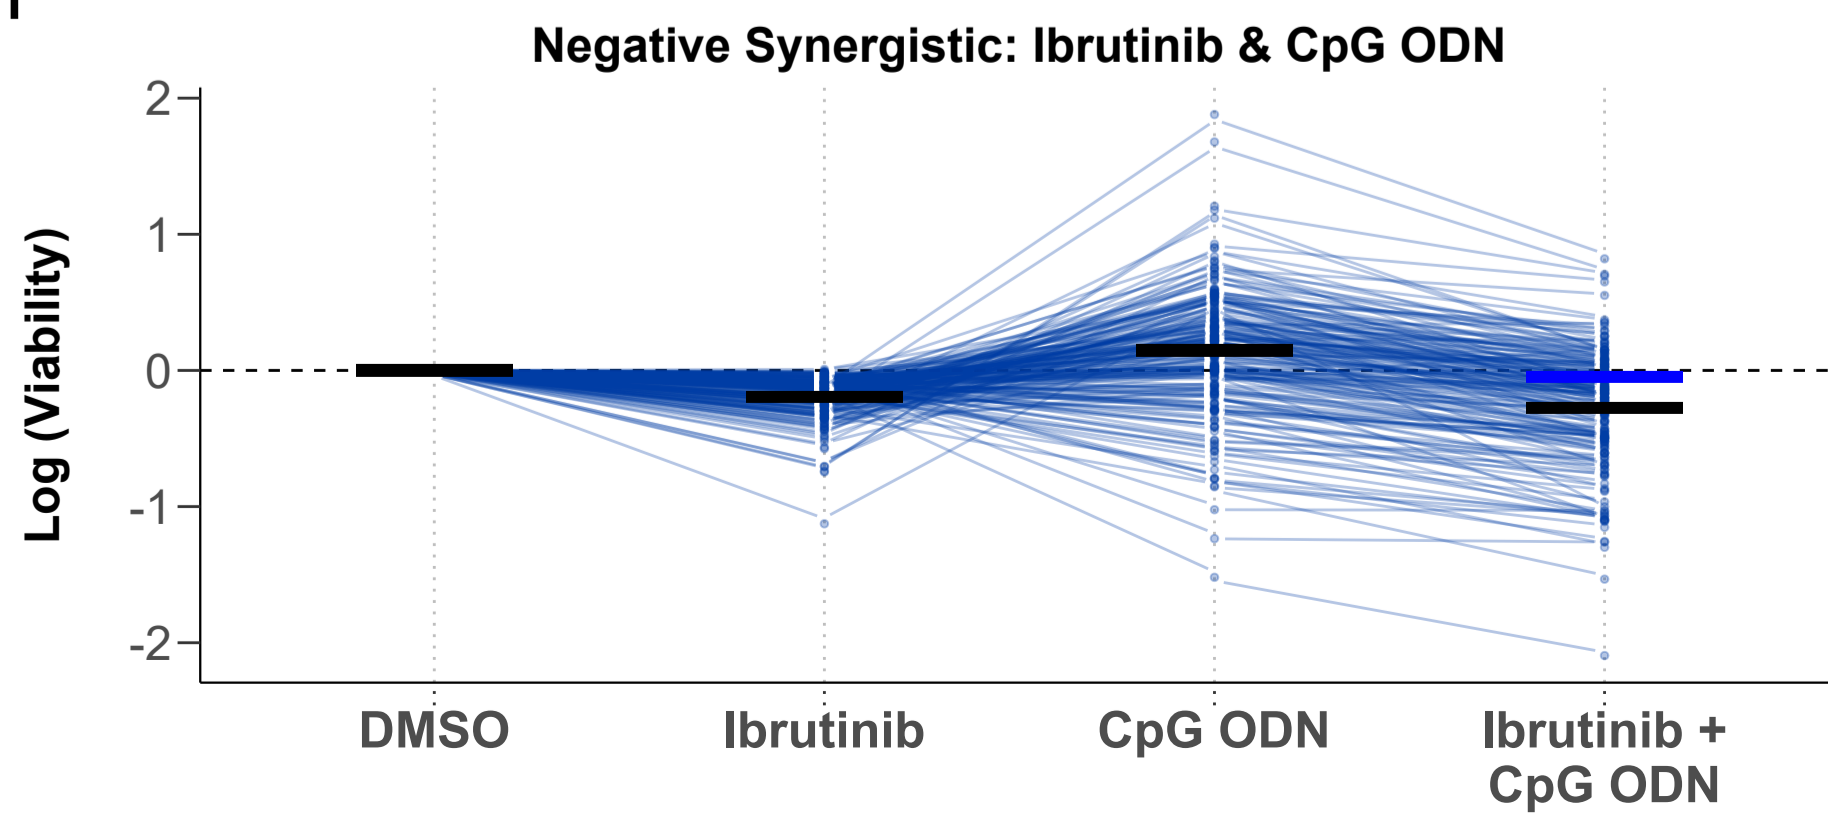

I

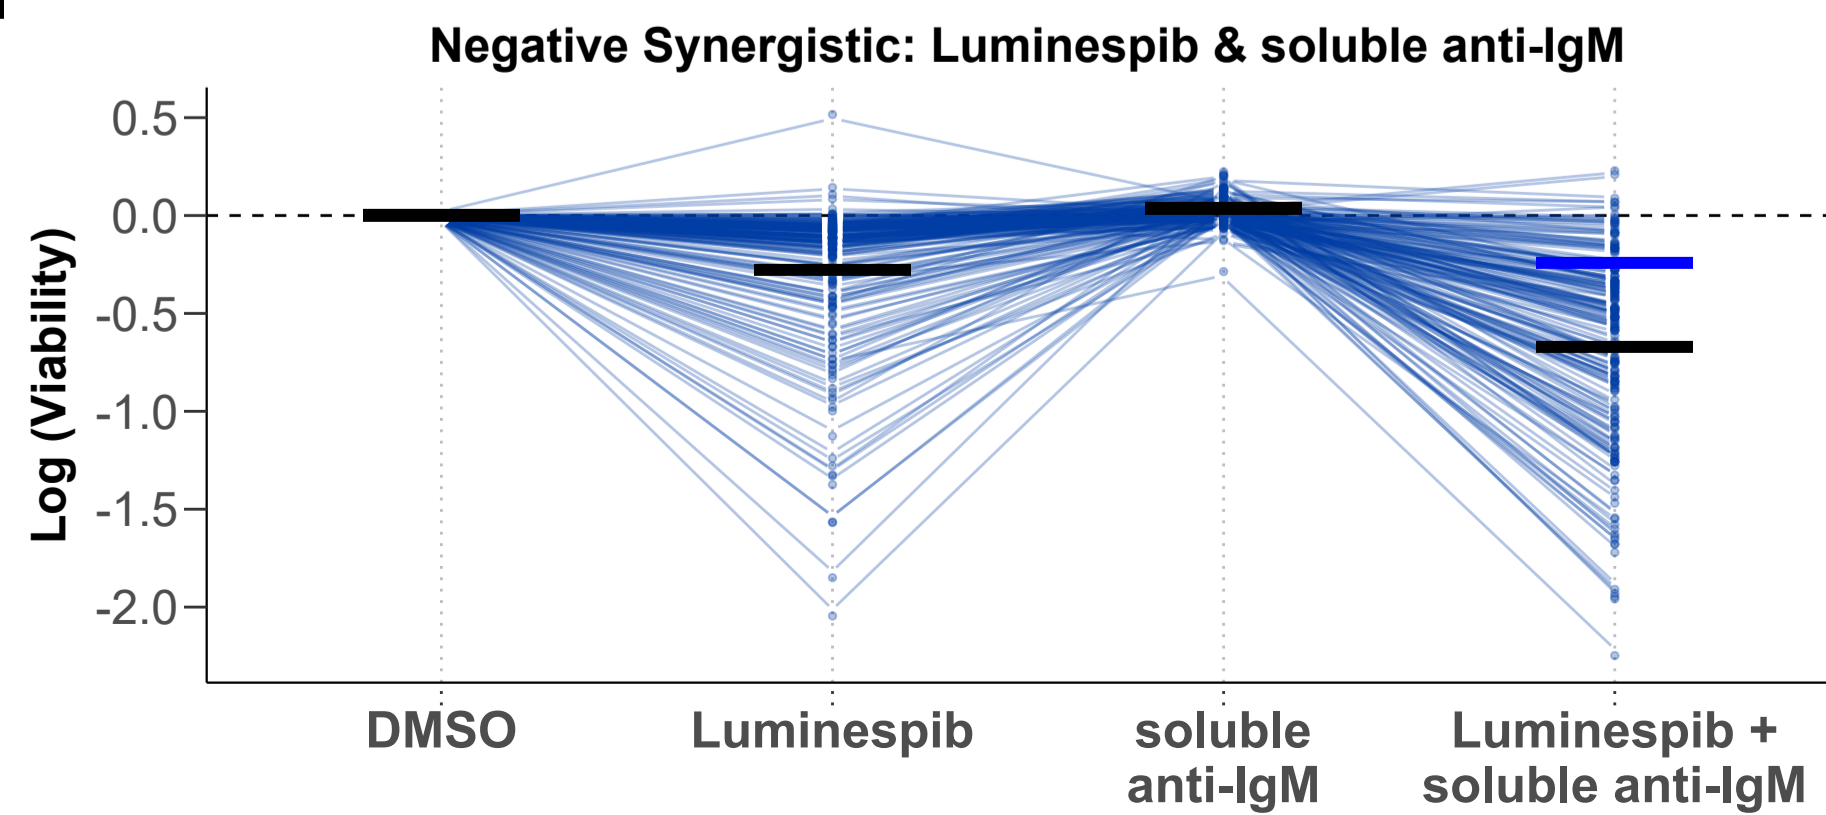

## Figure 5. Microenvironmental stimuli influence ex-vivo drug response.

(A) Graphical representation of the four drug-stimulus interaction categories. Categories are defined according to the nature of the interaction (synergistic or antagonistic), and whether the viability is increased or decreased by the stimulus (positive or negative). x-axis shows treatment type, y-axis shows viability with each treatment. Red and blue points and lines depict a representative treatment response pattern for given interaction type. Blue horizontal lines represent the expected viability for combinatorial treatment in the absence of an interaction between drug-stimulus (i.e. additive effects), black horizontal lines represent the measured viability after combinatorial treatment. The difference between the black and blue lines represents the drug - stimulus interaction.

(B) Bar plot of significant interactions in all four categories (p-value for  $\beta_{int}$  is  $<0.05$ ).

(C) Heatmap of all  $\beta_{int}$  values for which p-value  $<0.05$  for drug-stimulus combinations, annotated with interaction type. Scale indicates size and sign of  $\beta_{int}$ . Rows and columns clustered according to hierarchical clustering.

I: Positive  $\beta_{int}$  and antagonistic (Microenvironmental stimulation reduces drug effect)

II: Negative  $\beta_{int}$  and antagonistic (Drug reduces stimuli effect)

III: Positive  $\beta_{int}$  and synergistic (Microenvironmental stimulation and drug have synergistic pro-survival effect)

IV: Negative  $\beta_{int}$  and synergistic (Microenvironmental stimulation and drug show synergistic toxicity)

(D - I) Examples of drug-stimulus interactions, for each category. Plots show log transformed viability values with each treatment, for all samples. Each line represents one patient sample linked across treatments. Black lines in single treatments indicate viability predicted by the linear model. In combinatorial treatment, the expected viability based on the additive effect of drug and stimulus (blue), and the viability with interaction (black), are shown to indicate the impact of the interaction.

(D+E) Ibrutinib, a clinically used BTK inhibitor, is blocked by IL4 and IFN $\gamma$ .

(F) The JAK inhibitor pyridone-6 inhibits the pro-survival effect of sCD40L + IL4 stimulation.

(G) The p38 inhibitor ralimetinib and IFN $\gamma$  show a synergistic pro-survival effect not seen in either single treatment.

(H) TLR agonists, including CpG ODN (shown) increase sensitivity to BTK inhibition by ibrutinib, despite increasing viability as single treatments.

(I) Soluble anti-IgM sensitises CLL samples to HSP90 inhibition by luminespib.

Figure 6

A

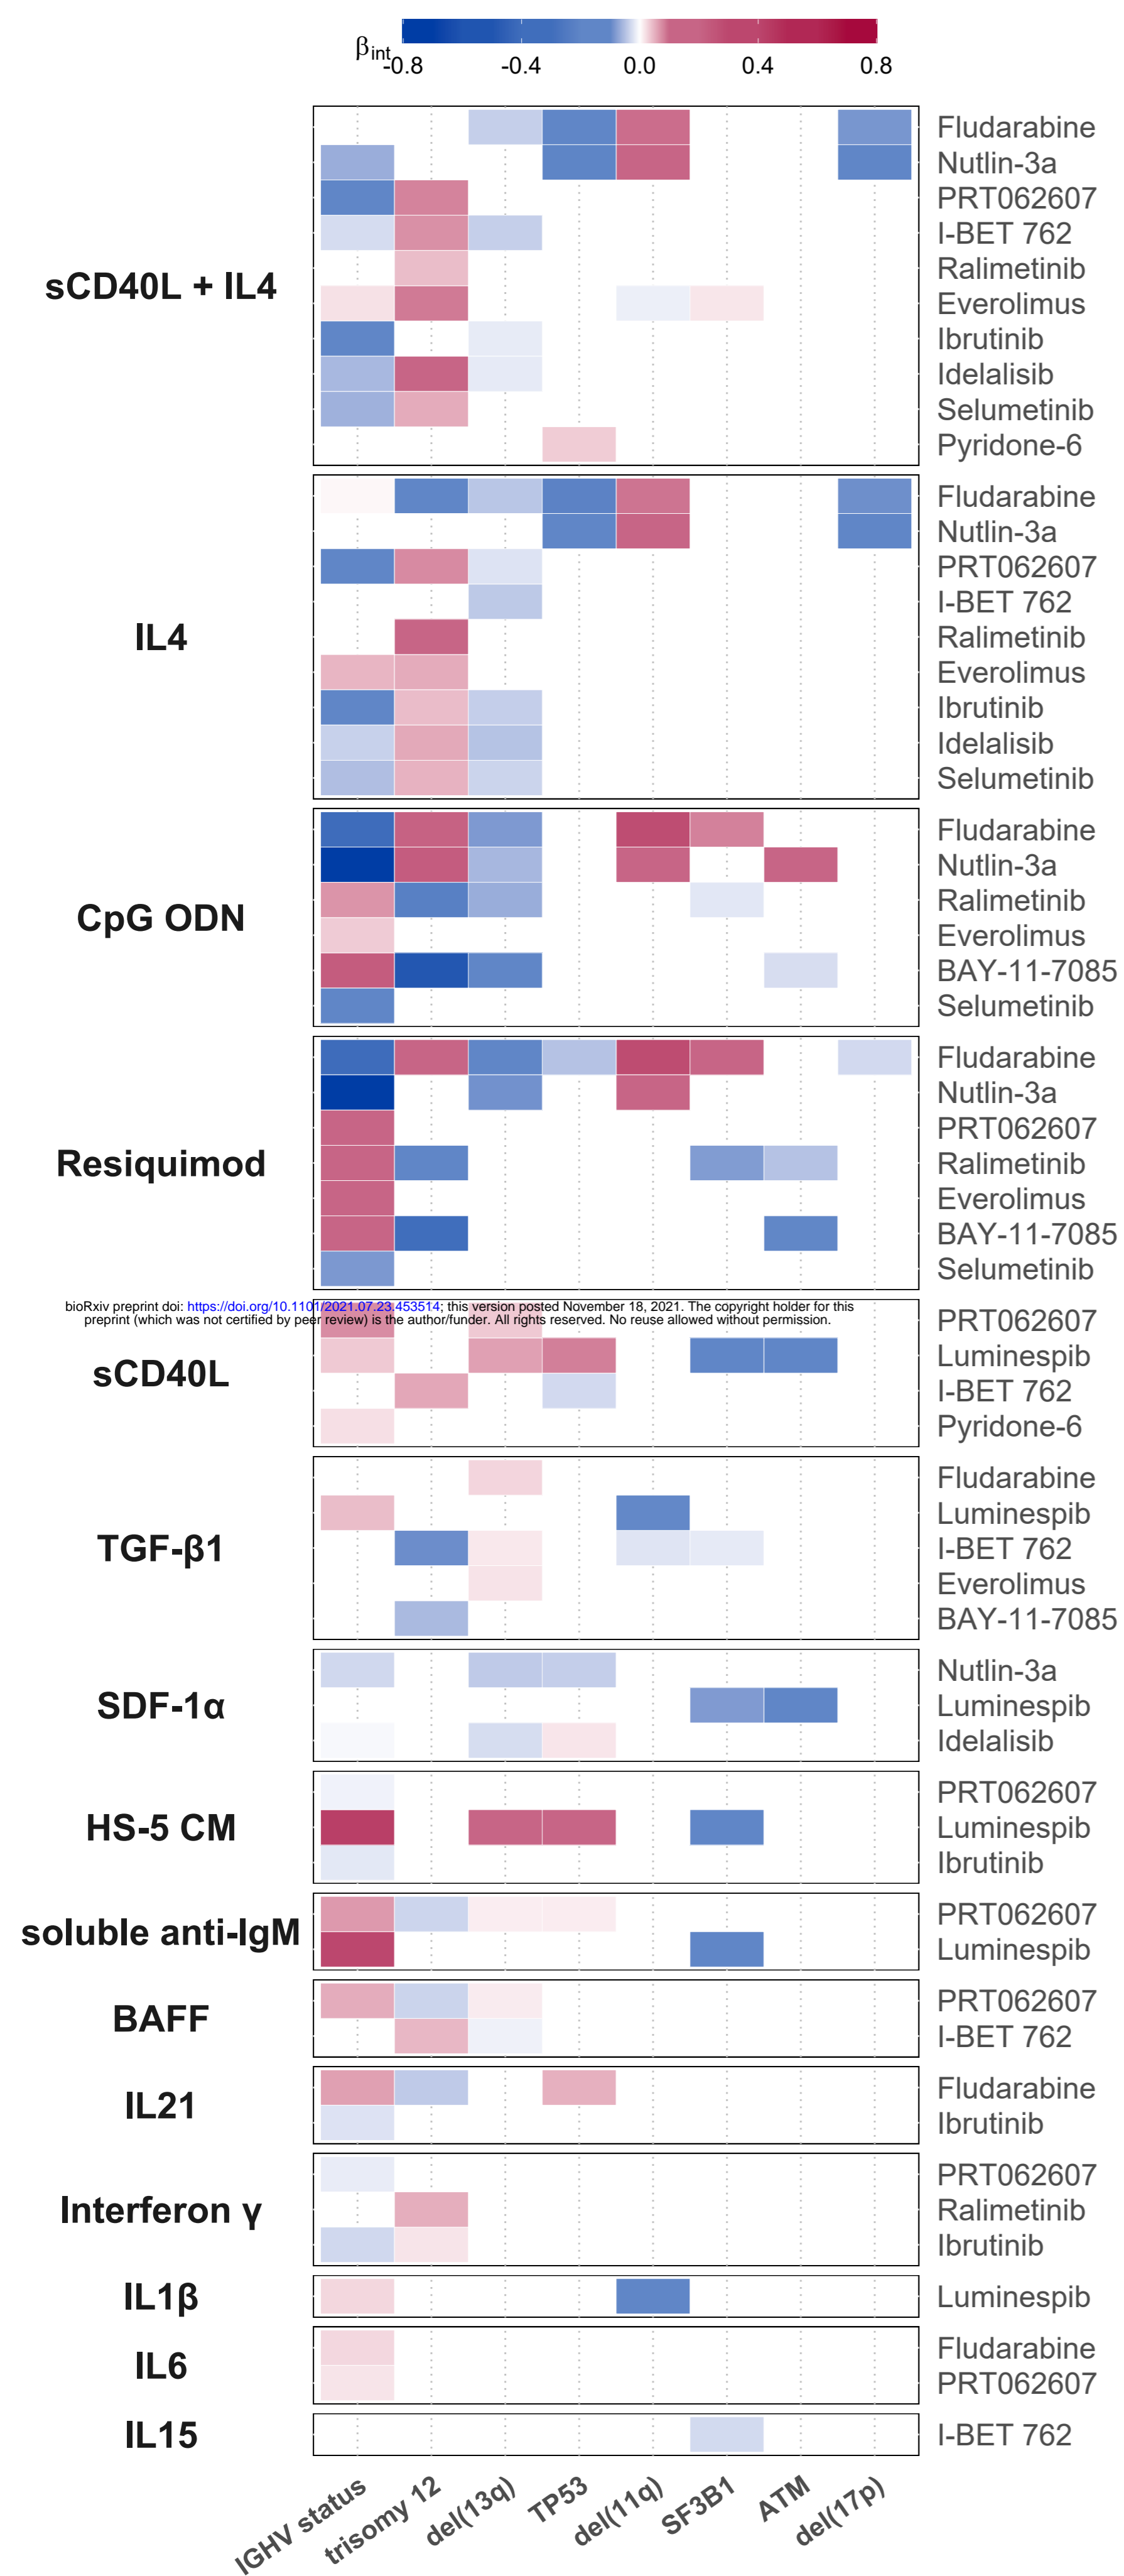

B

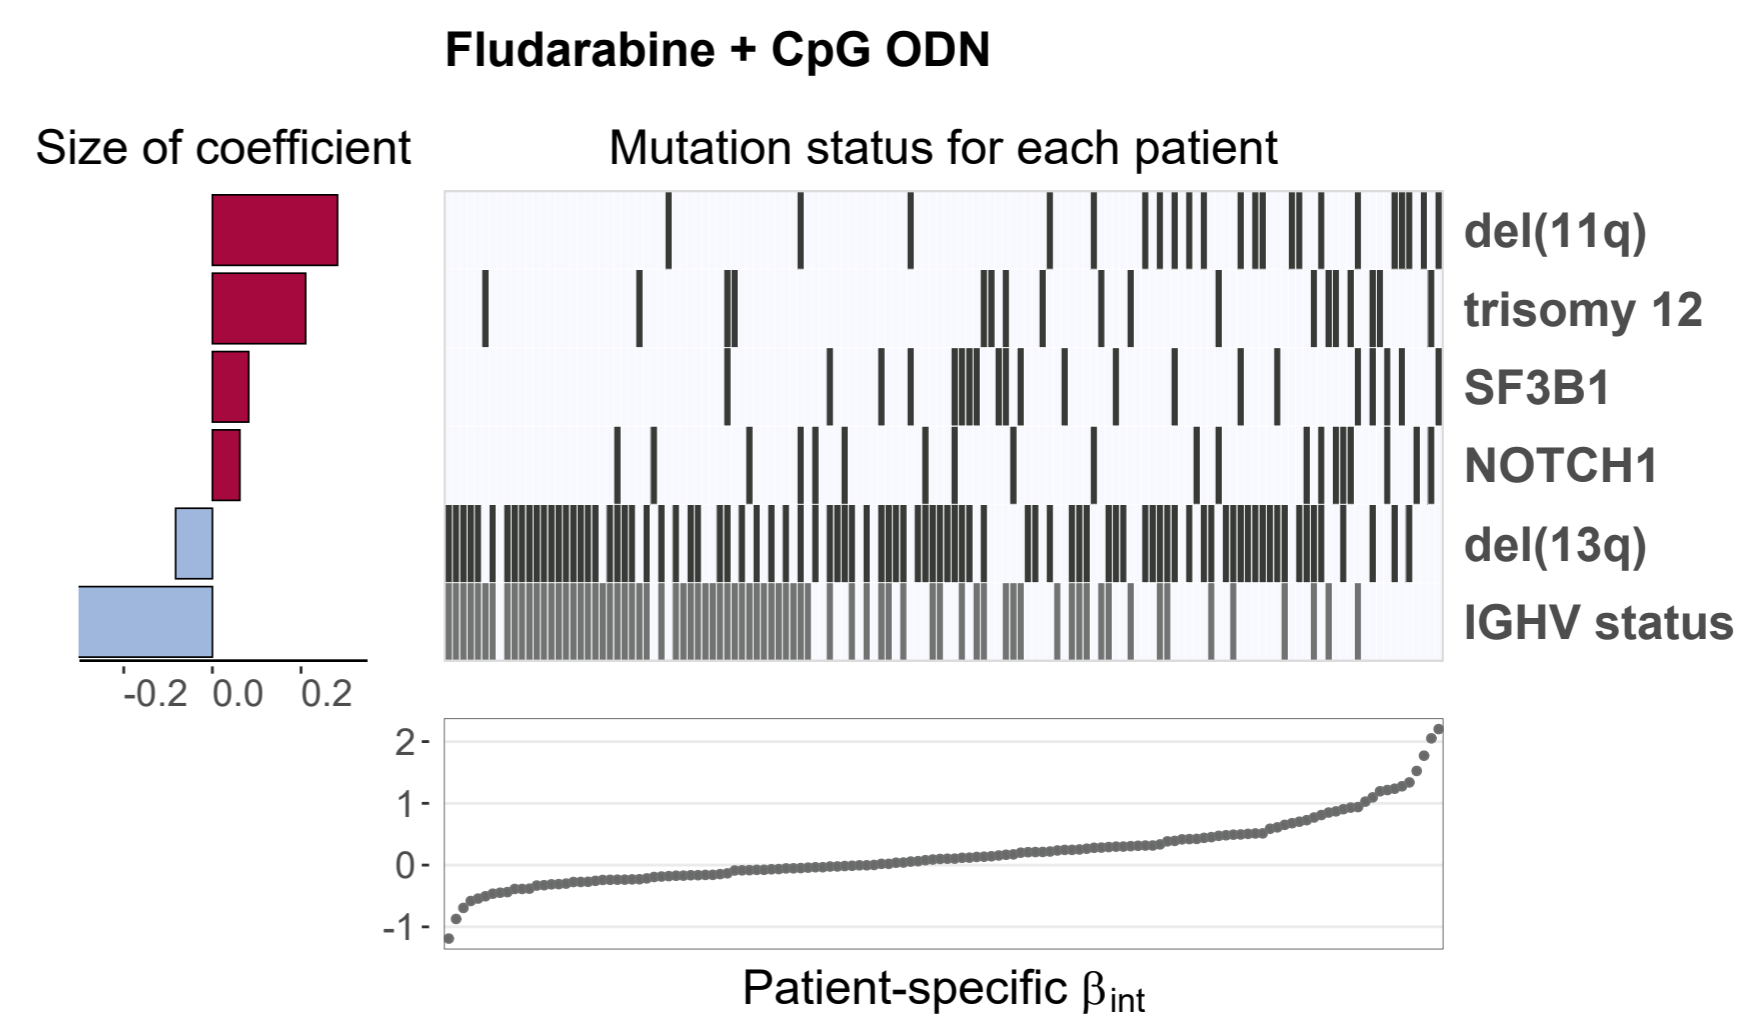

C

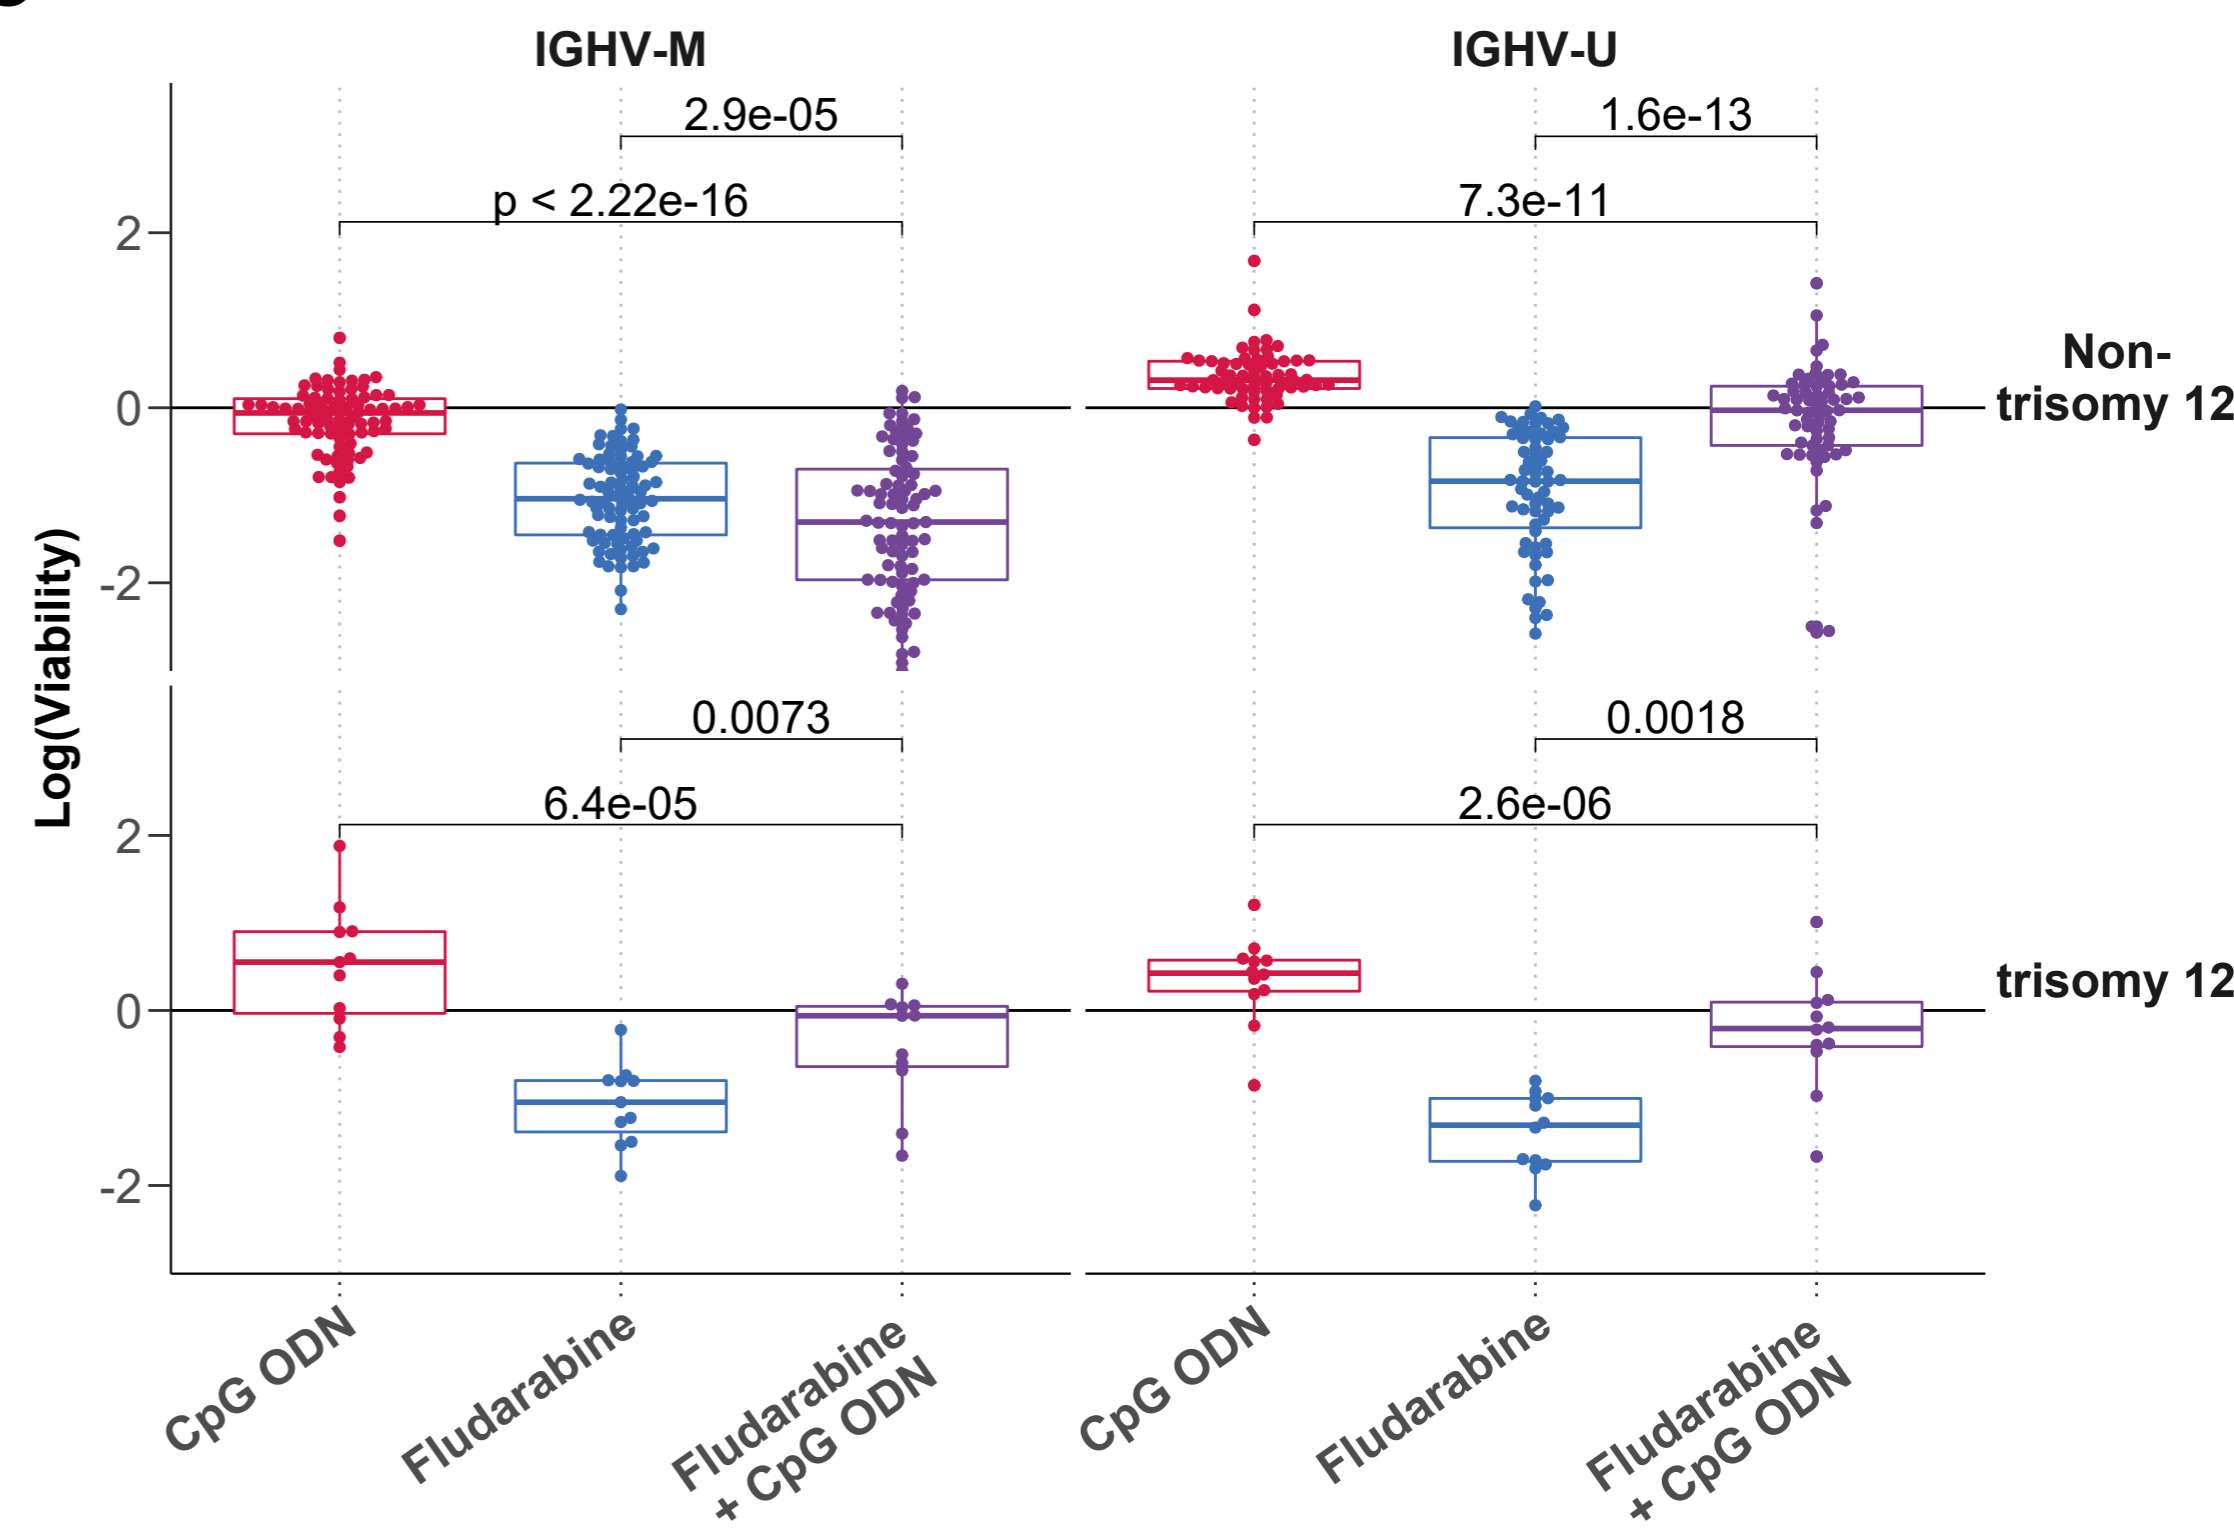

D

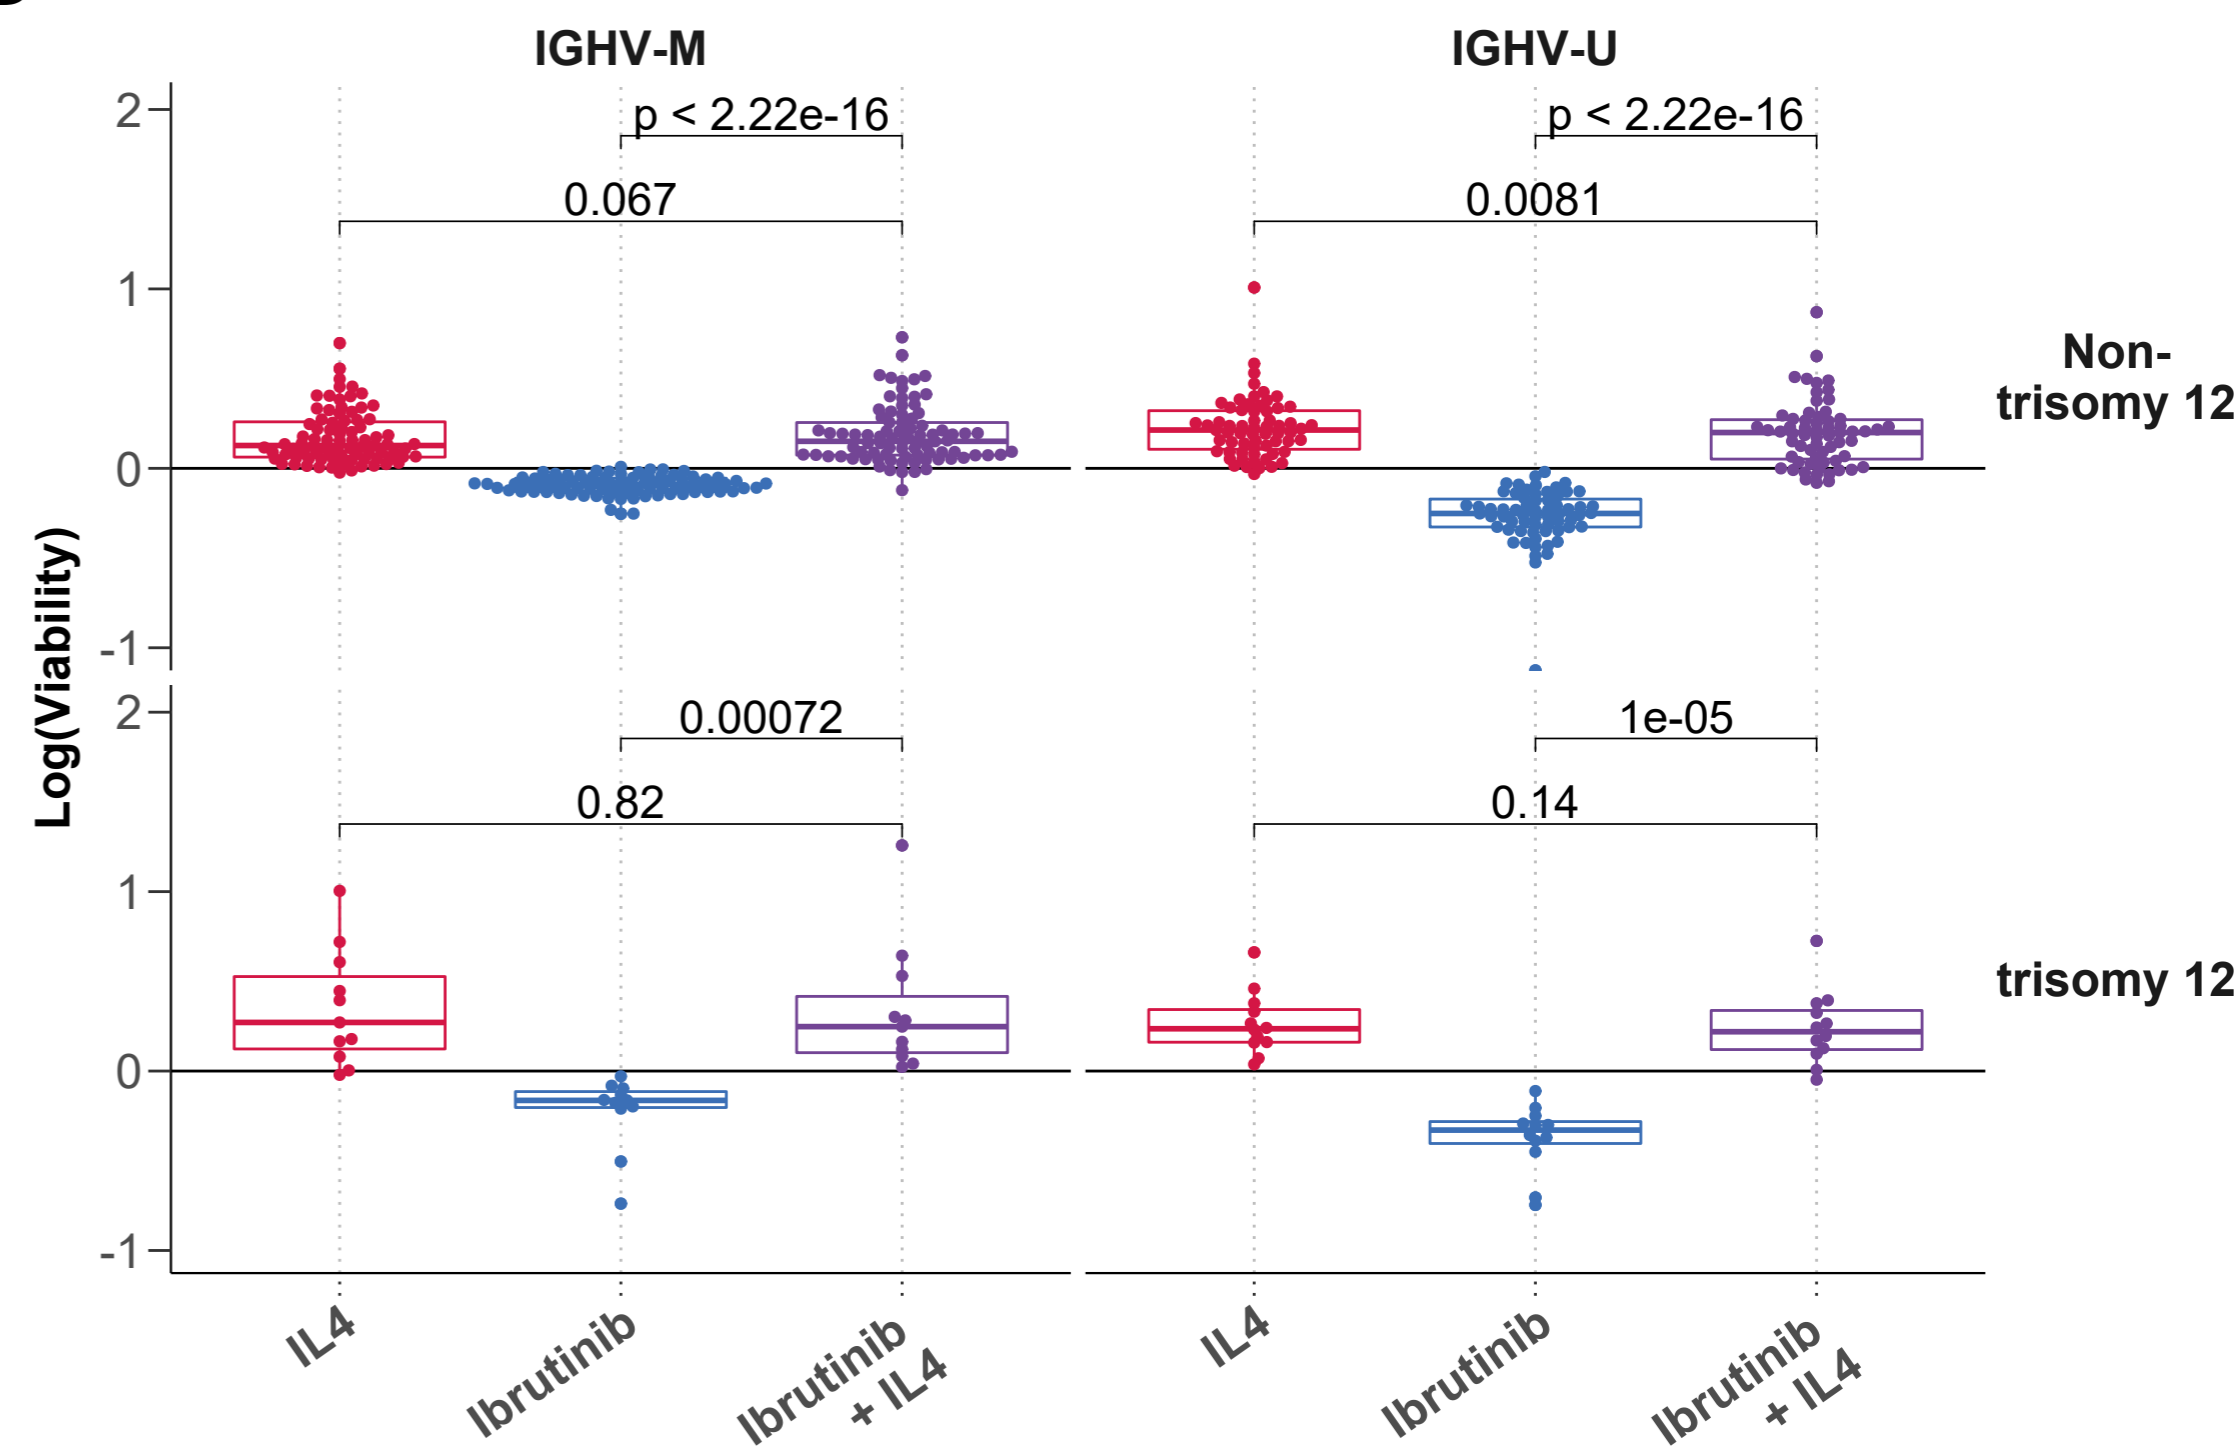

**Figure 6. Integrating the effects of genetic features and stimuli on drug response.**

(A) Heatmap depicting the eight most commonly selected genetic predictors of drug-stimulus interactions (each row represents the coefficients of a single multivariate model, as in (B)). Stimuli are shown on left, and corresponding drugs on right. Coloured fields indicate that  $\beta_{int}$  for given drug and stimulus is modulated by corresponding genetic feature. Positive coefficients are shown in red, indicating a more positive  $\beta_{int}$  if the feature is present. Drug-stimulus combinations with no genetic predictors of  $\beta_{int}$  amongst shown genetic factors are omitted for clarity.

(B) Predictor profile depicting genetic features that modulate the interaction between fludarabine and CpG ODN. The horizontal bars on left show the size of fitted coefficients assigned to genetic features. The matrix in the centre indicates patient mutation status for the selected genetic features aligned with the scatter plot indicating the size of  $\beta_{int}$  for each patient. Grey lines indicate the presence of genetic feature/IGHV mutated.

(C-D) Beeswarm boxplots of log(viability) values, for fludarabine + CpG ODN (C) and ibrutinib + IL4 (D) single and combinatorial treatments, faceted by IGHV status and trisomy 12 status. P-values from paired Student's t-tests.



Figure 7

A

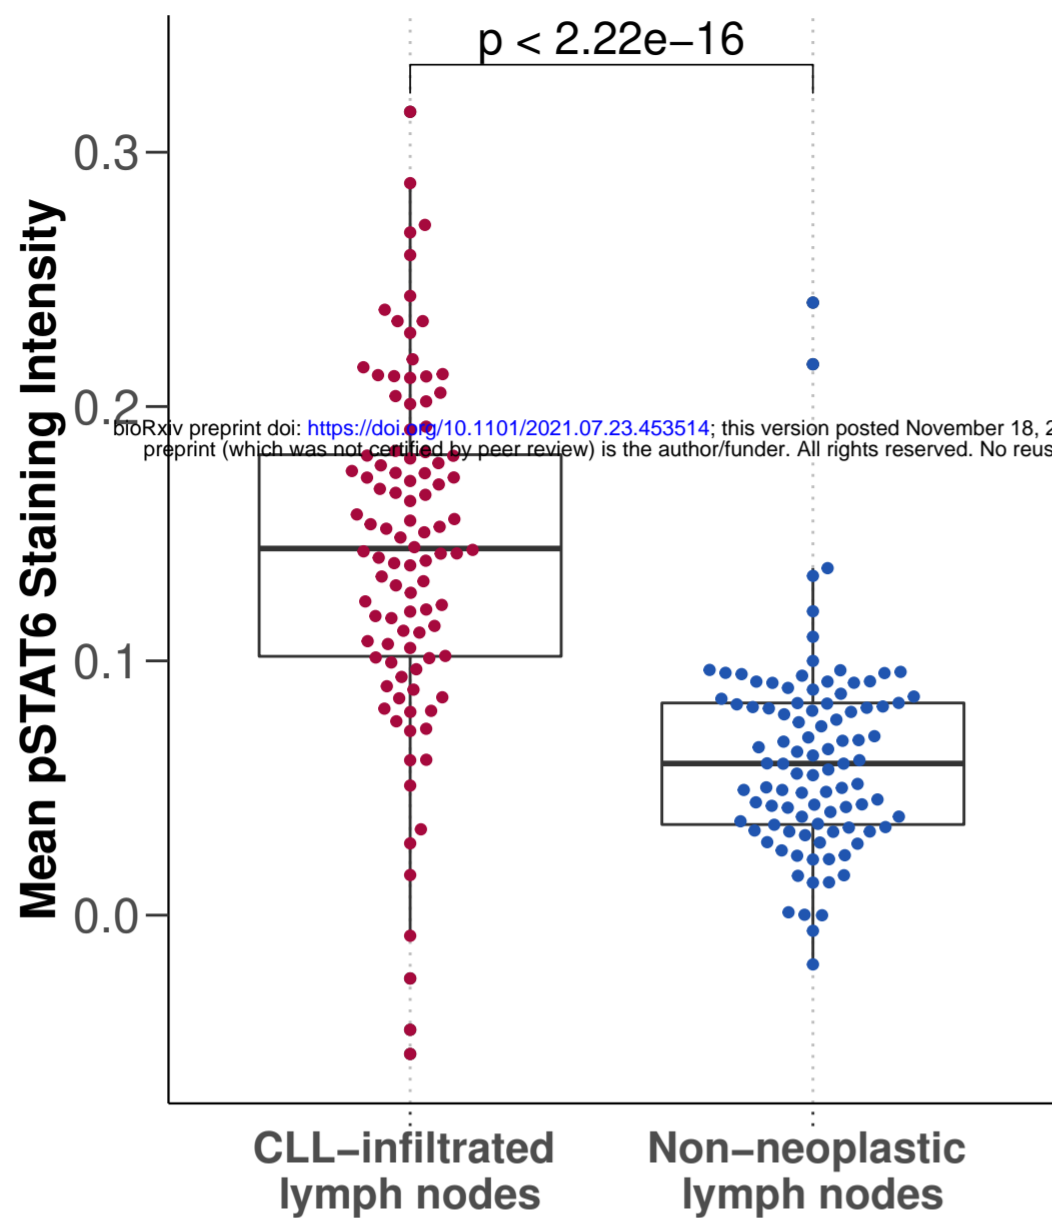

C

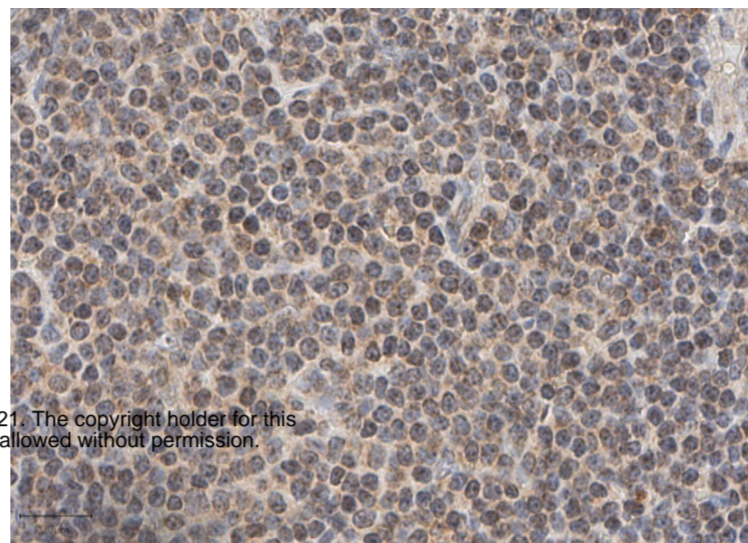

D

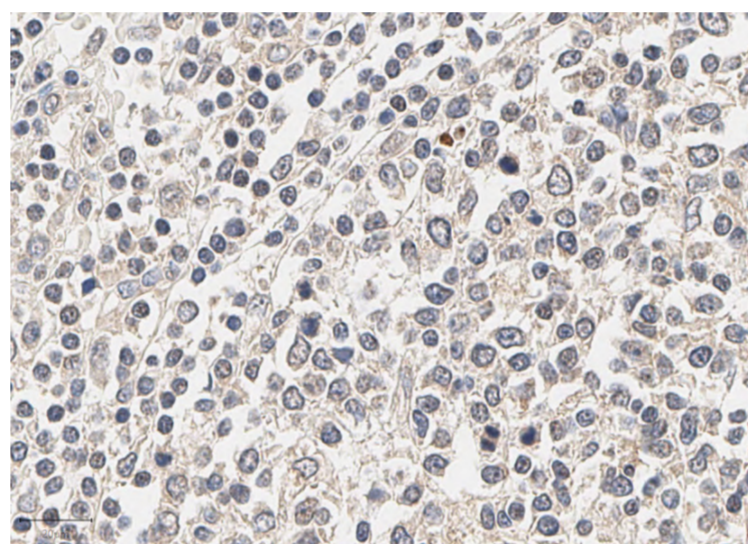

G

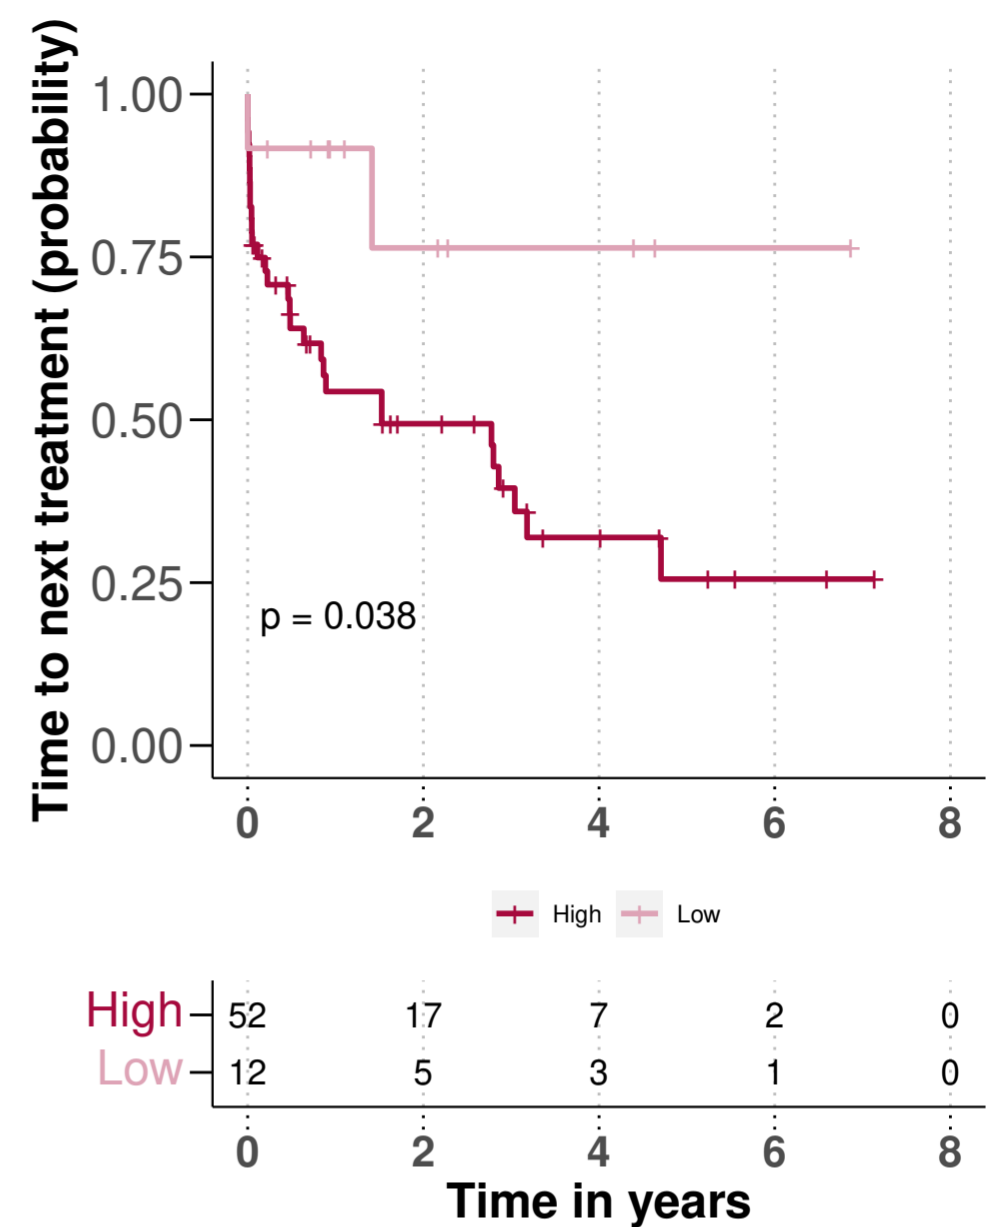

B

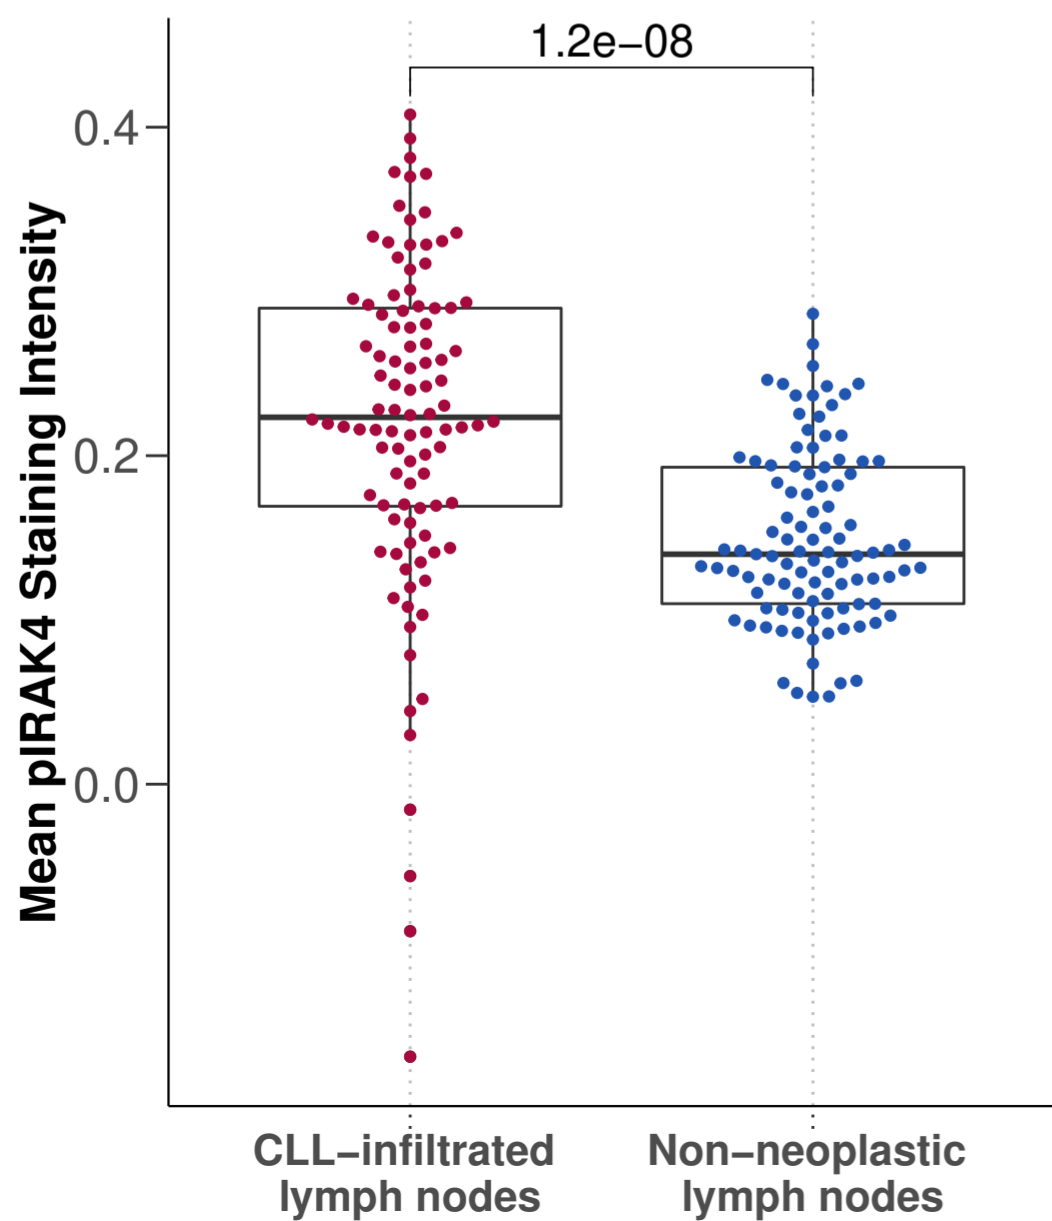

E

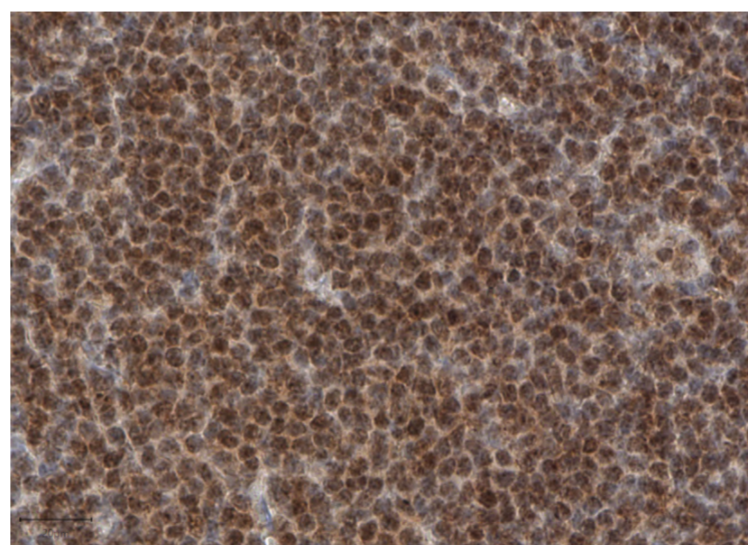

F

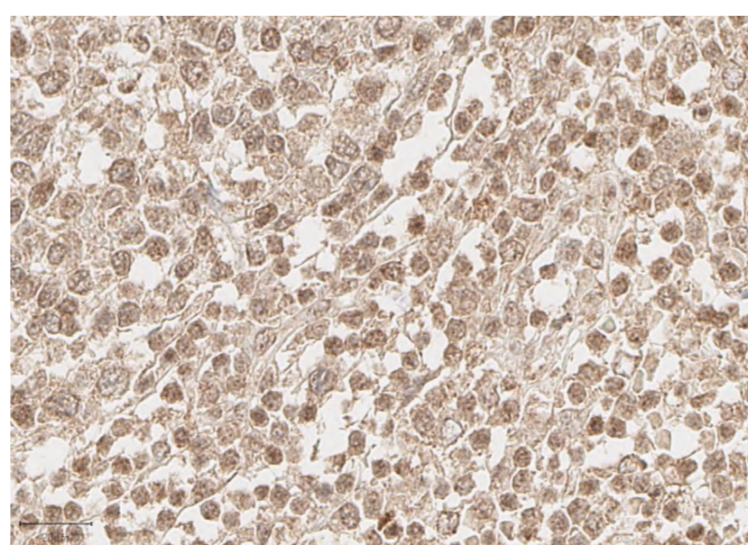

H

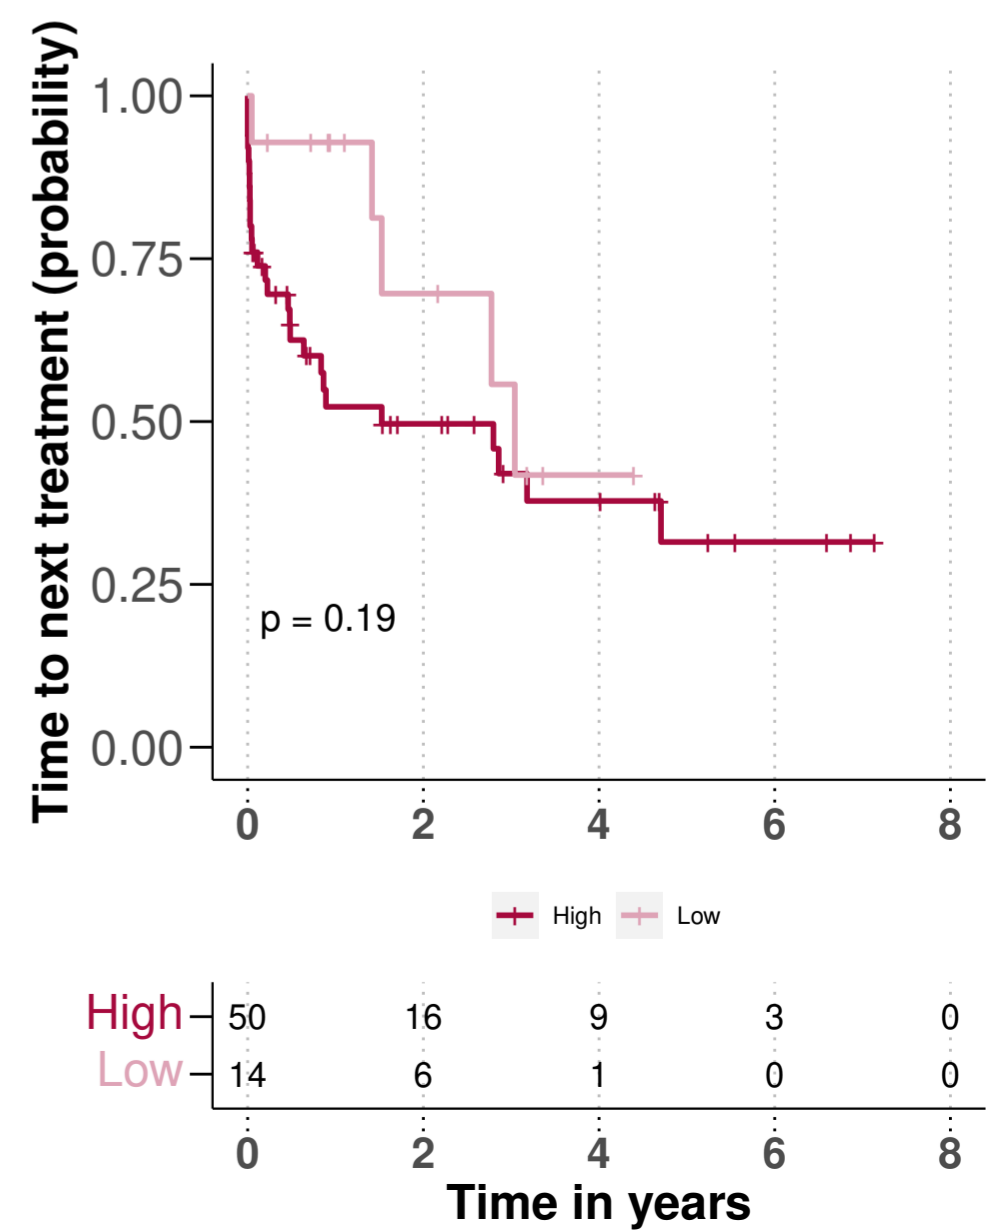

**Figure 7. IL4 and TLR signalling are upregulated in CLL-infiltrated lymph nodes.**

(A-B) Mean pSTAT6 (A) and pIRAK4 (B) staining intensity in CLL-infiltrated and non-neoplastic lymph node biopsies after background subtraction (y axis), p-values from Student's t-test.

Each dot represents the mean of all cells in TMA cores per patient sample.

(C-F) Example images of IHC sections.

(C + D) show pSTAT6 levels in (C) CLL-infiltrated and (D) non-neoplastic samples.

(E + F) show pIRAK4 levels in (E) CLL-infiltrated and (F) non-neoplastic samples.

(G + H) Kaplan-Meier plots for time to next treatment stratified by levels (high / low) of pSTAT6 (G) and pIRAK4 (H).
